# Supplementary material
Source: PubMed Central journal article supplement (PMC4934178)
Supplement: NIHMS797224-supplement-Supporting_Info.pdf [file NIHMS797224-supplement-Supporting_Info.pdf]

# Ligand-Enabled Stereoselective $\beta$ -C(sp<sup>3</sup>)-H Fluorination: Synthesis of Unnatural Enantiopure *anti*- $\beta$ -Fluoro- $\alpha$ -Amino Acids

Ru-Yi Zhu, Keita Tanaka, Gen-Cheng Li, Jian He, Hai-Yan Fu, Su-Hua Li, and Jin-Quan Yu\*  
Department of Chemistry, The Scripps Research Institute, 10550 North Torrey Pines Road,  
La Jolla, California 92037

## Table of Contents

|                                                |     |
|------------------------------------------------|-----|
| General Information                            | S1  |
| Substrate Structures                           | S2  |
| Experimental Section                           |     |
| Substrate Preparation                          | S3  |
| Ligand Synthesis                               | S4  |
| C(sp <sup>3</sup> )-H Fluorination             | S4  |
| References                                     | S14 |
| <sup>1</sup> H and <sup>13</sup> C NMR Spectra | S14 |
| X-ray Crystallographic Data of <b>2c</b>       | S47 |

## General Information

$\alpha$ -Amino acids and 2,3,5,6-tetrafluoro-4-(trifluoromethyl)aniline were obtained from the commercial sources or synthesized following literature procedures, and used to prepare the corresponding amides. Selectfluor was obtained from Oakwood. Pd(TFA)<sub>2</sub> was obtained from Strem. Ag<sub>2</sub>CO<sub>3</sub> was purchased from Alfa-Aesar. Solvents were obtained from Sigma-Aldrich, Alfa-Aesar and Acros and used directly without further purification. Analytical thin layer chromatography was performed on 0.25 mm silica gel 60-F254. Visualization was carried out with UV light and Vogel's permanganate. <sup>1</sup>H NMR was recorded on Bruker AMX-400 instrument (400 MHz) or Bruker DRX-600 instrument (600 MHz). Chemical shifts were quoted in parts per million (ppm) referenced to 0.0 ppm for tetramethylsilane. The following abbreviations (or combinations thereof) were used to explain multiplicities: s = singlet, d = doublet, t = triplet, q = quartet, m = multiplet, br = broad. Coupling constants, *J*, were reported in Hertz unit (Hz). <sup>13</sup>C NMR spectra were recorded on Bruker AMX-400 instrument (100 MHz) or Bruker DRX-600 instrument (150 MHz), and were fully decoupled by broad band proton decoupling. <sup>19</sup>F NMR spectra were recorded on Bruker AMX-400 instrument (376 MHz), and were fully decoupled by broad band proton decoupling. Chemical shifts were reported in ppm referenced to either the center line of a triplet at 77.0 ppm of chloroform-*d* or the center line of a multiplet at 29.84 ppm of acetone-*d*<sup>6</sup>. In the <sup>13</sup>C NMR analysis, peaks that correspond to those of the polyfluoroarylamide auxiliary appeared as nearly invisible, complex sets of multiplets; they were omitted in the following spectroscopic analysis. High-resolution mass spectra (HRMS) were recorded on an Agilent Mass spectrometer using ESI-TOF (electrospray ionization-time of flight).

## Substrate Structures

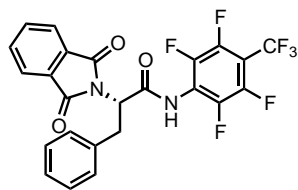

1a

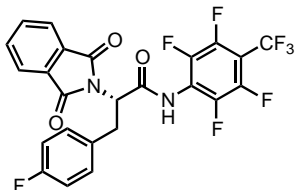

1b

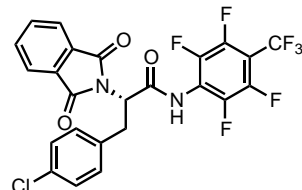

1c

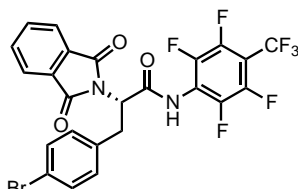

1d

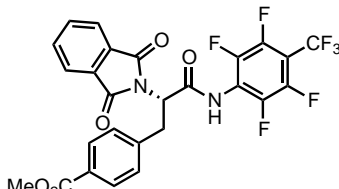

1e

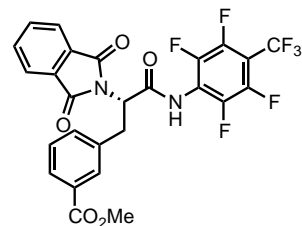

1f

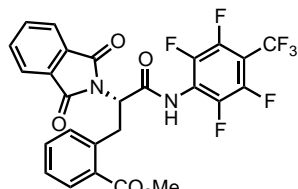

1g

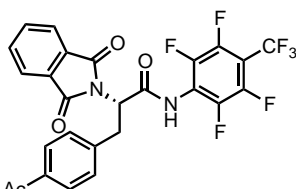

1h

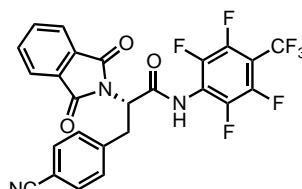

1i

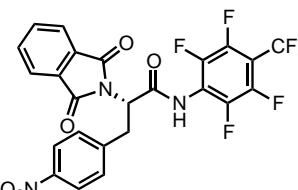

1j

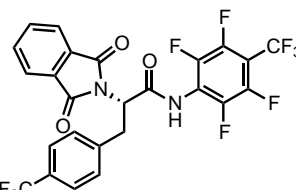

1k

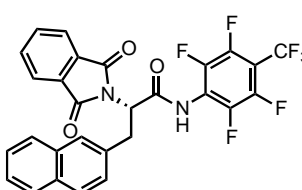

1l

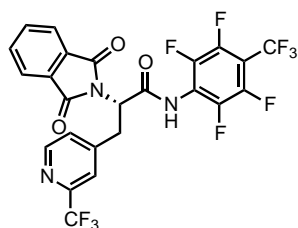

1m

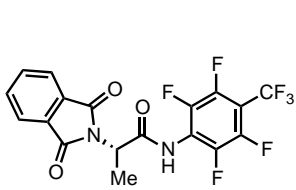

1n

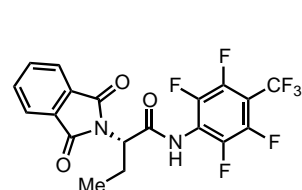

1o

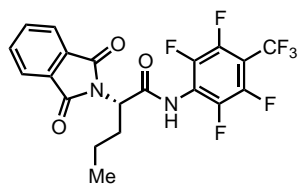

1p

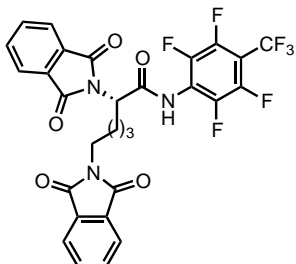

1q

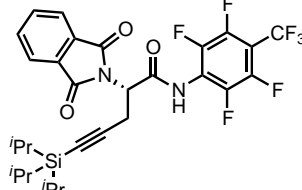

1r

## Experimental Section

### Substrate Preparation

Substrates **1a**, **1n-q** were prepared through traditional synthesis following literature procedure.<sup>1</sup> Substrates **1b-m** were prepared through C–H arylation method following literature procedure.<sup>1</sup> Substrate **1r** was prepared through C–H alkynylation method which is an unpublished result.

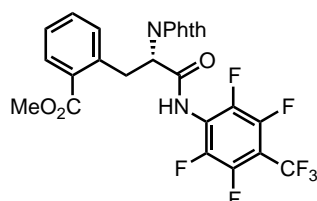

#### (S)-methyl

#### 2-(2-(1,3-dioxisoindolin-2-yl)-3-oxo-3-((2,3,5,6-tetrafluoro-4-(trifluoromethyl)phenyl)amino)propyl)benzoate (**1g**)

<sup>1</sup>H NMR (400 MHz, CDCl<sub>3</sub>) δ 9.23 (br s, 1H), 8.14-8.11 (m, 1H), 7.85-7.83 (m, 2H), 7.74-7.72 (m, 2H), 7.36-7.30 (m, 2H), 7.11-7.09 (m, 1H), 5.38 (dd, *J*<sub>1</sub> = 2.4 Hz, *J*<sub>2</sub> = 10.4 Hz, 1H), 4.17-4.02 (m, 2H), 4.01 (s, 3H). <sup>13</sup>C NMR (150 MHz, CDCl<sub>3</sub>) δ 168.28, 168.08, 166.46, 140.22, 134.28, 133.26, 132.20, 131.55, 127.78, 127.58, 123.65, 56.29, 52.72, 34.28. HRMS (ESI-TOF) Calcd for C<sub>26</sub>H<sub>14</sub>F<sub>7</sub>N<sub>2</sub>O<sub>5</sub> [M-H]<sup>-</sup>: 567.0796, found: 567.0800.

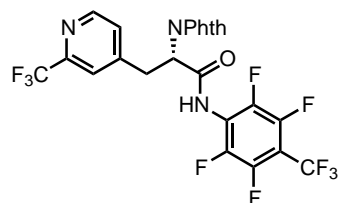

#### (S)-2-(1,3-dioxisoindolin-2-yl)-N-(2,3,5,6-tetrafluoro-4-(trifluoromethyl)phenyl)-3-(2-(trifluoromethyl)pyridin-4-yl)propanamide (**1m**)

<sup>1</sup>H NMR (600 MHz, CDCl<sub>3</sub>) δ 8.59 (d, *J* = 5.4 Hz, 1H), 8.21 (br s, 1H), 7.86-7.85 (m, 2H), 7.80-7.79 (m, 2H), 7.51 (s, 1H), 7.38 (d, *J* = 4.8 Hz, 1H), 5.38 (dd, *J*<sub>1</sub> = 6.0 Hz, *J*<sub>2</sub> = 10.2 Hz, 1H), 3.78-3.68 (m, 2H). <sup>13</sup>C NMR (150 MHz, CDCl<sub>3</sub>) δ 167.72, 165.58, 150.42, 148.77 (q, *J* = 34.6 Hz), 146.95, 135.23, 130.69, 126.77, 124.20, 123.01 (q, *J* = 278.2 Hz), 120.98 (q, *J* = 2.7 Hz), 54.72, 34.37. HRMS (ESI-TOF) Calcd for C<sub>24</sub>H<sub>10</sub>F<sub>10</sub>N<sub>3</sub>O<sub>3</sub> [M-H]<sup>-</sup>: 578.0568, found: 578.0570.

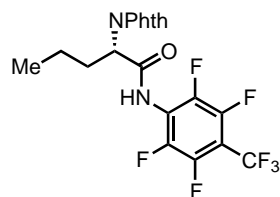

#### (S)-2-(1,3-dioxisoindolin-2-yl)-N-(2,3,5,6-tetrafluoro-4-(trifluoromethyl)phenyl)pentanamide (**1p**)

<sup>1</sup>H NMR (400 MHz, CDCl<sub>3</sub>) δ 8.63 (br s, 1H), 7.93-7.91 (m, 2H), 7.82-7.80 (m, 2H), 5.09 (dd,

$J_1 = 6.4$  Hz,  $J_2 = 10.0$  Hz, 1H), 2.37-2.19 (m, 2H), 1.44-1.34 (m, 2H), 0.98 (t,  $J = 7.2$  Hz, 3H).  $^{13}\text{C}$  NMR (150 MHz,  $\text{CDCl}_3$ )  $\delta$  168.35, 167.19, 134.84, 131.25, 124.01, 55.59, 31.43, 19.41, 13.34. HRMS (ESI-TOF) Calcd for  $\text{C}_{20}\text{H}_{12}\text{F}_7\text{N}_2\text{O}_3$   $[\text{M}-\text{H}]^-$ : 461.0742, found: 461.0745.

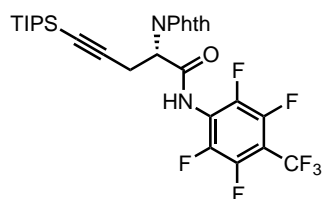

**(S)-2-(1,3-dioxoisindolin-2-yl)-N-(2,3,5,6-tetrafluoro-4-(trifluoromethyl)phenyl)-5-(triisopropylsilyl)pent-4-ynamide (1r)**

$^1\text{H}$  NMR (400 MHz,  $\text{CDCl}_3$ )  $\delta$  8.41 (br s, 1H), 7.90-7.88 (m, 2H), 7.79-7.77 (m, 2H), 5.26 (dd,  $J_1 = 6.8$  Hz,  $J_2 = 10.0$  Hz, 1H), 3.41-3.24 (m, 2H), 0.87-0.85 (m, 21H).  $^{13}\text{C}$  NMR (150 MHz,  $\text{CDCl}_3$ )  $\delta$  167.72, 165.78, 134.72, 131.47, 123.95, 101.83, 85.56, 53.22, 21.08, 18.26, 10.95. HRMS (ESI-TOF) Calcd for  $\text{C}_{29}\text{H}_{28}\text{F}_7\text{N}_2\text{O}_3\text{Si}$   $[\text{M}-\text{H}]^-$ : 613.1763, found: 613.1764.

### Ligand Synthesis

Ligands **4-10** were prepared following literature procedure.<sup>2</sup>

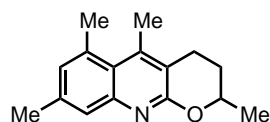

**2,5,6,8-tetramethyl-3,4-dihydro-2H-pyrano[2,3-b]quinoline (L10)**

$^1\text{H}$  NMR (400 MHz,  $\text{CDCl}_3$ )  $\delta$  7.46 (s, 1H), 6.96 (s, 1H), 4.37-4.29 (m, 1H), 2.96-2.90 (m, 1H), 2.85-2.76 (m, 1H), 2.82 (s, 3H), 2.70 (s, 3H), 2.40 (s, 3H), 2.16-2.10 (m, 1H), 1.84-1.73 (m, 1H), 1.50 (d,  $J = 6.0$  Hz, 3H).  $^{13}\text{C}$  NMR (150 MHz,  $\text{CDCl}_3$ )  $\delta$  159.22, 147.59, 145.73, 137.88, 134.13, 130.10, 126.25, 123.67, 115.63, 72.74, 29.31, 26.00, 23.98, 21.35, 21.17, 18.83. HRMS (ESI-TOF) Calcd for  $\text{C}_{16}\text{H}_{20}\text{NO}$   $[\text{M}+\text{H}]^+$ : 242.1539, found: 242.1545.

### $\text{C}(\text{sp}^3)\text{-H}$ Fluorination

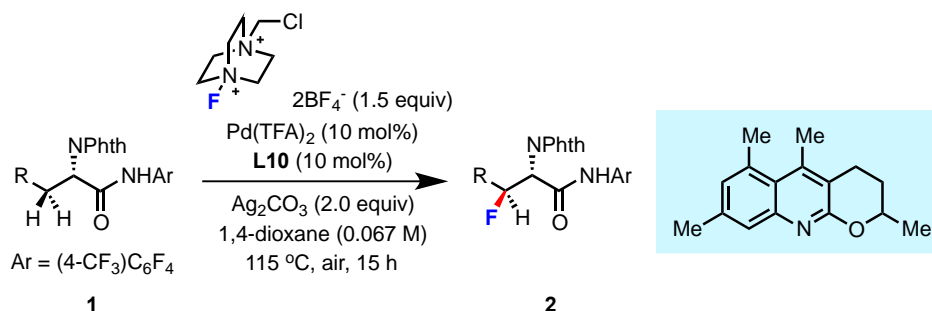

**General Procedures for the  $\text{C}(\text{sp}^3)\text{-H}$  Fluorination:** Substrate **1** (0.10 mmol), Selectfluor (0.15 mmol, 53.2 mg),  $\text{Pd}(\text{TFA})_2$  (0.01 mmol, 3.3 mg), **L10** (0.01 mmol, 2.4 mg) and  $\text{Ag}_2\text{CO}_3$  (0.20 mmol, 55.2 mg) were weighed into a tube (10 mL) with a magnetic stir bar under air. 1,4-Dioxane (1.5 mL) was added, and the tube was sealed with a cap. The reaction mixture was stirred at 115 °C for 15 hours. Upon completion, the reaction mixture was cooled to room temperature and diluted with EtOAc. Then the reaction mixture was filtered through

a short celite tube and purified by preparative thin-layer chromatography using hexane/DCM mixtures as the eluent.

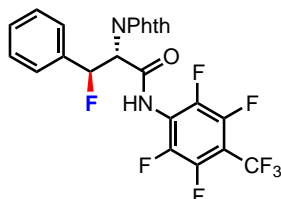

**(2R,3S)-2-(1,3-dioxoisindolin-2-yl)-3-fluoro-3-phenyl-N-(2,3,5,6-tetrafluoro-4-(trifluoromethyl)phenyl)propanamide (2a)**

Substrate **1a** was fluorinated following the general fluorination procedure. Analysis of crude reaction mixture by  $^1\text{H}$  NMR showed a > 20:1 diastereomer ratio. After purification by preparative thin-layer chromatography, **2a** was obtained as a colorless oil (41.9 mg, 79%).  $^1\text{H}$  NMR (400 MHz,  $\text{CDCl}_3$ )  $\delta$  8.33 (br d,  $J = 11.2$  Hz, 1H), 7.77-7.74 (m, 2H), 7.71-7.67 (m, 2H), 7.43-7.40 (m, 2H), 7.32-7.31 (m, 3H), 6.57 (dd,  $J_1 = 10.0$  Hz,  $J_2 = 47.6$  Hz, 1H), 5.53 (dd,  $J_1 = 9.6$  Hz,  $J_2 = 13.2$  Hz, 1H).  $^{13}\text{C}$  NMR (150 MHz,  $\text{CDCl}_3$ )  $\delta$  167.01, 163.93 (d,  $J = 2.7$  Hz), 134.52, 133.93 (d,  $J = 18.9$  Hz), 131.13, 130.34 (d,  $J = 2.6$  Hz), 128.90, 127.05 (d,  $J = 5.6$  Hz), 123.84, 91.96 (d,  $J = 169.2$  Hz), 56.42 (d,  $J = 36.2$  Hz).  $^{19}\text{F}$  NMR (376 MHz,  $\text{CDCl}_3$ )  $\delta$  -56.35 (t,  $J = 21.8$  Hz, 3F), -140.49-(-140.69) (m, 2F), -142.13-(-142.24) (m, 2F), -164.60 (s, 1F). HRMS (ESI-TOF) Calcd for  $\text{C}_{24}\text{H}_{11}\text{F}_8\text{N}_2\text{O}_3$   $[\text{M}-\text{H}]^-$ : 527.0647, found: 527.0644.

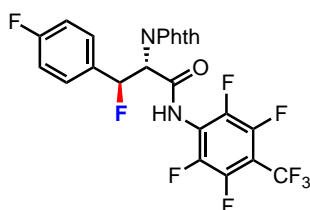

**(2R,3S)-2-(1,3-dioxoisindolin-2-yl)-3-fluoro-3-(4-fluorophenyl)-N-(2,3,5,6-tetrafluoro-4-(trifluoromethyl)phenyl)propanamide (2b)**

Substrate **1b** was fluorinated following the general fluorination procedure. Analysis of crude reaction mixture by  $^1\text{H}$  NMR showed a > 20:1 diastereomer ratio. After purification by preparative thin-layer chromatography, **2b** was obtained as a white solid (38.2 mg, 70%).  $^1\text{H}$  NMR (400 MHz,  $\text{CDCl}_3$ )  $\delta$  8.27 (br d,  $J = 10.8$  Hz, 1H), 7.79-7.75 (m, 2H), 7.73-7.69 (m, 2H), 7.43-7.40 (m, 2H), 7.01 (t,  $J = 8.6$  Hz, 2H), 6.57 (dd,  $J_1 = 9.6$  Hz,  $J_2 = 47.2$  Hz, 1H), 5.49 (dd,  $J_1 = 9.6$  Hz,  $J_2 = 13.2$  Hz, 1H).  $^{13}\text{C}$  NMR (150 MHz,  $\text{CDCl}_3$ )  $\delta$  167.01, 163.75 (d,  $J = 2.6$  Hz), 163.62 (dd,  $J_1 = 3.0$  Hz,  $J_2 = 249.0$  Hz), 134.66, 131.05, 129.92 (dd,  $J_1 = 19.2$  Hz,  $J_2 = 3.0$  Hz), 129.20 (dd,  $J_1 = 8.7$  Hz,  $J_2 = 5.4$  Hz), 123.92, 116.11 (d,  $J = 21.8$  Hz), 91.27 (d,  $J = 169.2$  Hz), 56.37 (d,  $J = 36.3$  Hz).  $^{19}\text{F}$  NMR (376 MHz,  $\text{CDCl}_3$ )  $\delta$  -56.36 (t,  $J = 22.2$  Hz, 3F), -109.92 (d,  $J = 5.3$  Hz, 1F), -140.42-(-140.62) (m, 2F), -142.17-(-142.29) (m, 2F), -163.03 (d,  $J = 4.5$  Hz, 1F). HRMS (ESI-TOF) Calcd for  $\text{C}_{24}\text{H}_{10}\text{F}_9\text{N}_2\text{O}_3$   $[\text{M}-\text{H}]^-$ : 545.0553, found: 545.0554.

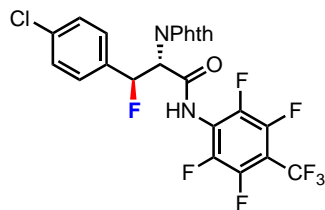

**(2*R*,3*S*)-3-(4-chlorophenyl)-2-(1,3-dioxisoindolin-2-yl)-3-fluoro-*N*-(2,3,5,6-tetrafluoro-4-(trifluoromethyl)phenyl)propanamide (2c)**

Substrate **1c** was fluorinated following the general fluorination procedure. Analysis of crude reaction mixture by  $^1\text{H}$  NMR showed a > 20:1 diastereomer ratio. After purification by preparative thin-layer chromatography, **2c** was obtained as a white solid (37.6 mg, 67%).  $^1\text{H}$  NMR (400 MHz,  $\text{CDCl}_3$ )  $\delta$  8.25 (br d,  $J = 10.8$  Hz, 1H), 7.79-7.77 (m, 2H), 7.72-7.70 (m, 2H), 7.37 (d,  $J = 8.0$  Hz, 2H), 7.30 (d,  $J = 8.8$  Hz, 2H), 6.56 (dd,  $J_1 = 9.2$  Hz,  $J_2 = 47.2$  Hz, 1H), 5.48 (dd,  $J_1 = 10.0$  Hz,  $J_2 = 13.6$  Hz, 1H).  $^{13}\text{C}$  NMR (150 MHz,  $\text{CDCl}_3$ )  $\delta$  167.03, 163.67 (d,  $J = 2.7$  Hz), 136.41 (d,  $J = 3.2$  Hz), 134.69, 132.49 (d,  $J = 19.4$  Hz), 131.05, 129.26, 128.47 (d,  $J = 5.4$  Hz), 123.97, 91.21 (d,  $J = 169.5$  Hz), 56.30 (d,  $J = 36.1$  Hz).  $^{19}\text{F}$  NMR (376 MHz,  $\text{CDCl}_3$ )  $\delta$  -56.36 (t,  $J = 21.4$  Hz, 3F), -140.36-(-140.55) (m, 2F), -140.60-(-142.25) (m, 2F), -164.51 (s, 1F). HRMS (ESI-TOF) Calcd for  $\text{C}_{24}\text{H}_{10}\text{ClF}_8\text{N}_2\text{O}_3$  [M-H] $^-$ : 561.0258, found: 561.0254.

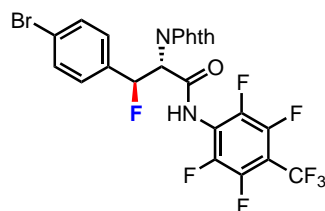

**(2*R*,3*S*)-3-(4-bromophenyl)-2-(1,3-dioxisoindolin-2-yl)-3-fluoro-*N*-(2,3,5,6-tetrafluoro-4-(trifluoromethyl)phenyl)propanamide (2d)**

Substrate **1d** was fluorinated following the general fluorination procedure. Analysis of crude reaction mixture by  $^1\text{H}$  NMR showed a > 20:1 diastereomer ratio. After purification by preparative thin-layer chromatography, **2d** was obtained as a white solid (41.3 mg, 68%).  $^1\text{H}$  NMR (400 MHz,  $\text{CDCl}_3$ )  $\delta$  8.28 (br d,  $J = 9.2$  Hz, 1H), 7.81-7.79 (m, 2H), 7.74-7.72 (m, 2H), 7.48 (d,  $J = 8.0$  Hz, 2H), 7.32 (d,  $J = 6.8$  Hz, 2H), 6.57 (dd,  $J_1 = 10.4$  Hz,  $J_2 = 46.8$  Hz, 1H), 5.50 (dd,  $J_1 = 9.6$  Hz,  $J_2 = 13.6$  Hz, 1H).  $^{13}\text{C}$  NMR (150 MHz,  $\text{CDCl}_3$ )  $\delta$  167.04, 163.67 (d,  $J = 2.7$  Hz), 134.70, 133.01 (d,  $J = 19.4$  Hz), 132.21, 131.05, 128.70 (d,  $J = 5.4$  Hz), 124.70 (d,  $J = 3.6$  Hz), 123.98, 91.24 (d,  $J = 169.8$  Hz), 56.25 (d,  $J = 35.8$  Hz).  $^{19}\text{F}$  NMR (376 MHz,  $\text{CDCl}_3$ )  $\delta$  -56.36 (t,  $J = 22.2$  Hz, 3F), -140.37-(-140.62) (m, 2F), -142.19-(-142.26) (m, 2F), -164.86 (s, 1F). HRMS (ESI-TOF) Calcd for  $\text{C}_{24}\text{H}_{10}\text{BrF}_8\text{N}_2\text{O}_3$  [M-H] $^-$ : 604.9753, found: 604.9750.

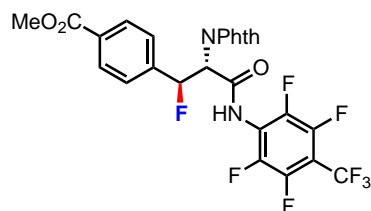

### methyl

#### 4-((1*S*,2*R*)-2-(1,3-dioxisoindolin-2-yl)-1-fluoro-3-oxo-3-((2,3,5,6-tetrafluoro-4-(trifluoromethyl)phenyl)amino)propyl)benzoate (**2e**)

Substrate **1e** was fluorinated following the general fluorination procedure. Analysis of crude reaction mixture by  $^1\text{H}$  NMR showed a > 20:1 diastereomer ratio. After purification by preparative thin-layer chromatography, **2e** was obtained as a colorless oil (45.3 mg, 77%).  $^1\text{H}$  NMR (400 MHz,  $\text{CDCl}_3$ )  $\delta$  8.31 (br d,  $J = 10.0$  Hz, 1H), 7.98 (d,  $J = 8.0$  Hz, 2H), 7.77-7.75 (m, 2H), 7.71-7.69 (m, 2H), 7.49 (d,  $J = 8.0$  Hz, 2H), 6.62 (dd,  $J_1 = 9.6$  Hz,  $J_2 = 47.2$  Hz, 1H), 5.50 (dd,  $J_1 = 9.6$  Hz,  $J_2 = 13.6$  Hz, 1H), 3.87 (s, 3H).  $^{13}\text{C}$  NMR (150 MHz,  $\text{CDCl}_3$ )  $\delta$  166.97, 166.17, 163.60 (d,  $J = 2.1$  Hz), 138.65 (d,  $J = 18.8$  Hz), 134.69, 131.84 (d,  $J = 2.2$  Hz), 130.98, 130.08, 126.98 (d,  $J = 5.7$  Hz), 123.95, 91.13 (d,  $J = 171.0$  Hz), 56.38 (d,  $J = 35.4$  Hz), 52.31.  $^{19}\text{F}$  NMR (376 MHz,  $\text{CDCl}_3$ )  $\delta$  -56.37 (t,  $J = 21.8$  Hz, 3F), -140.40-(-140.64) (m, 2F), -142.16-(-142.26) (m, 2F), -167.88 (s, 1F). HRMS (ESI-TOF) Calcd for  $\text{C}_{26}\text{H}_{13}\text{F}_8\text{N}_2\text{O}_5$   $[\text{M-H}]^-$ : 585.0702, found: 585.0703.

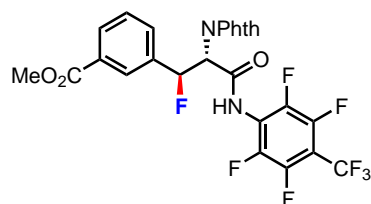

### methyl

#### 3-((1*S*,2*R*)-2-(1,3-dioxisoindolin-2-yl)-1-fluoro-3-oxo-3-((2,3,5,6-tetrafluoro-4-(trifluoromethyl)phenyl)amino)propyl)benzoate (**2f**)

Substrate **1f** was fluorinated following the general fluorination procedure. Analysis of crude reaction mixture by  $^1\text{H}$  NMR showed a > 20:1 diastereomer ratio. After purification by preparative thin-layer chromatography, **2f** was obtained as a colorless oil (45.8 mg, 78%).  $^1\text{H}$  NMR (400 MHz,  $\text{CDCl}_3$ )  $\delta$  8.34 (br d,  $J = 10.4$  Hz, 1H), 8.10 (s, 1H), 8.00 (d,  $J = 7.6$  Hz, 1H), 7.78-7.76 (m, 2H), 7.70-7.68 (m, 2H), 7.61 (d,  $J = 7.2$  Hz, 1H), 7.41 (t,  $J = 7.6$  Hz, 1H), 6.63 (dd,  $J_1 = 9.6$  Hz,  $J_2 = 47.2$  Hz, 1H), 5.54 (dd,  $J_1 = 9.6$  Hz,  $J_2 = 12.8$  Hz, 1H), 3.88 (s, 3H).  $^{13}\text{C}$  NMR (150 MHz,  $\text{CDCl}_3$ )  $\delta$  167.01, 166.02, 163.70 (d,  $J = 2.7$  Hz), 134.60 (d,  $J = 19.0$  Hz), 134.63, 131.38 (d,  $J = 1.6$  Hz), 131.28 (d,  $J = 5.2$  Hz), 131.05, 130.94, 129.08, 128.19 (d,  $J = 6.0$  Hz), 123.93, 91.21 (d,  $J = 170.6$  Hz), 56.45 (d,  $J = 35.4$  Hz), 52.34.  $^{19}\text{F}$  NMR (376 MHz,  $\text{CDCl}_3$ )  $\delta$  -56.37 (t,  $J = 21.4$  Hz, 3F), -140.45-(-140.65) (m, 2F), -142.14-(-142.23) (m, 2F), -166.36 (s, 1F). HRMS (ESI-TOF) Calcd for  $\text{C}_{26}\text{H}_{13}\text{F}_8\text{N}_2\text{O}_5$   $[\text{M-H}]^-$ : 585.0702, found: 585.0706.

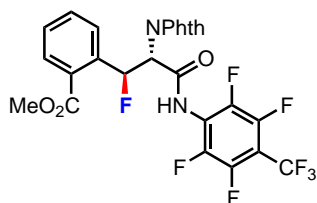

### methyl

#### 2-((1*S*,2*R*)-2-(1,3-dioxoisindolin-2-yl)-1-fluoro-3-oxo-3-((2,3,5,6-tetrafluoro-4-(trifluoromethyl)phenyl)amino)propyl)benzoate (**2g**)

Substrate **1g** was fluorinated following the general fluorination procedure. Analysis of crude reaction mixture by  $^1\text{H}$  NMR showed a > 20:1 diastereomer ratio. After purification by preparative thin-layer chromatography, **2g** was obtained as a colorless oil (44.9 mg, 77%).  $^1\text{H}$  NMR (400 MHz,  $\text{CDCl}_3$ )  $\delta$  8.91 (br d,  $J = 7.2$  Hz, 1H), 7.87 (d,  $J = 8.0$  Hz, 1H), 7.84-7.82 (m, 2H), 7.75-7.73 (m, 2H), 7.68 (d,  $J = 7.6$  Hz, 1H), 7.57 (t,  $J = 7.6$  Hz, 1H), 7.42 (t,  $J = 7.2$  Hz, 1H), 7.16 (dd,  $J_1 = 7.2$  Hz,  $J_2 = 46.8$  Hz, 1H), 5.74 (dd,  $J_1 = 7.6$  Hz,  $J_2 = 16.0$  Hz, 1H), 3.90 (s, 3H).  $^{13}\text{C}$  NMR (150 MHz,  $\text{CDCl}_3$ )  $\delta$  167.31, 167.10, 163.60, 135.68 (d,  $J = 19.8$  Hz), 134.62, 132.56, 131.24, 130.91, 129.66 (d,  $J = 1.4$  Hz), 129.03 (d,  $J = 3.6$  Hz), 127.56 (d,  $J = 9.3$  Hz), 123.89, 88.77 (d,  $J = 175.0$  Hz), 58.09 (d,  $J = 30.9$  Hz), 52.64.  $^{19}\text{F}$  NMR (376 MHz,  $\text{CDCl}_3$ )  $\delta$  -56.33 (t,  $J = 21.8$  Hz, 3F), -140.76-(-141.00) (m, 2F), -141.97-(-142.08) (m, 2F), -173.97 (s, 1F). HRMS (ESI-TOF) Calcd for  $\text{C}_{26}\text{H}_{13}\text{F}_8\text{N}_2\text{O}_5$  [M-H] $^-$ : 585.0702, found: 585.0707.

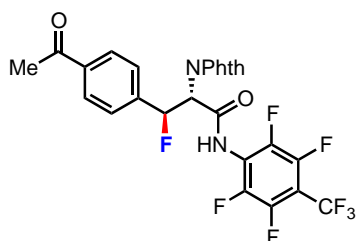

#### (2*R*,3*S*)-3-(4-acetylphenyl)-2-(1,3-dioxoisindolin-2-yl)-3-fluoro-*N*-(2,3,5,6-tetrafluoro-4-(trifluoromethyl)phenyl)propanamide (**2h**)

Substrate **1h** was fluorinated following the general fluorination procedure. Analysis of crude reaction mixture by  $^1\text{H}$  NMR showed a > 20:1 diastereomer ratio. After purification by preparative thin-layer chromatography, **2h** was obtained as a colorless oil (37.9 mg, 66%).  $^1\text{H}$  NMR (400 MHz,  $\text{CDCl}_3$ )  $\delta$  8.33 (br d,  $J = 10.0$  Hz, 1H), 7.89 (d,  $J = 8.0$  Hz, 2H), 7.78-7.76 (m, 2H), 7.71-7.69 (m, 2H), 7.62 (d,  $J = 8.0$  Hz, 2H), 7.52 (d,  $J = 8.0$  Hz, 2H), 6.63 (dd,  $J_1 = 9.6$  Hz,  $J_2 = 47.2$  Hz, 1H), 5.51 (dd,  $J_1 = 9.6$  Hz,  $J_2 = 13.2$  Hz, 1H).  $^{13}\text{C}$  NMR (150 MHz,  $\text{CDCl}_3$ )  $\delta$  197.34, 167.01, 163.58 (d,  $J = 2.5$  Hz), 138.76 (d,  $J = 18.6$  Hz), 138.38 (d,  $J = 2.5$  Hz), 134.72, 131.00, 128.78, 127.23 (d,  $J = 5.7$  Hz), 123.97, 91.08 (d,  $J = 171.0$  Hz), 56.38 (d,  $J = 35.1$  Hz), 26.63.  $^{19}\text{F}$  NMR (376 MHz,  $\text{CDCl}_3$ )  $\delta$  -56.36 (t,  $J = 21.8$  Hz, 3F), -140.36-(-140.61) (m, 2F), -142.17-(-142.25) (m, 2F), -167.88 (s, 1F). HRMS (ESI-TOF) Calcd for  $\text{C}_{26}\text{H}_{13}\text{F}_8\text{N}_2\text{O}_4$  [M-H] $^-$ : 569.0753, found: 569.0757.



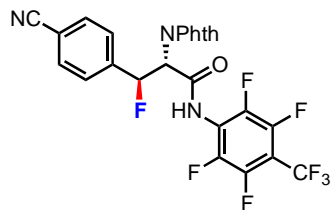

**(2*R*,3*S*)-3-(4-cyanophenyl)-2-(1,3-dioxisoindolin-2-yl)-3-fluoro-*N*-(2,3,5,6-tetrafluoro-4-(trifluoromethyl)phenyl)propanamide (2i)**

Substrate **1i** was fluorinated following the general fluorination procedure. Analysis of crude reaction mixture by  $^1\text{H}$  NMR showed a > 20:1 diastereomer ratio. After purification by preparative thin-layer chromatography, **2i** was obtained as a colorless oil (48.0 mg, 87%).  $^1\text{H}$  NMR (400 MHz,  $\text{CDCl}_3$ )  $\delta$  8.26 (br d,  $J = 8.4$  Hz, 1H), 7.80-7.78 (m, 2H), 7.74-7.72 (m, 2H), 7.62 (d,  $J = 8.0$  Hz, 2H), 7.54 (d,  $J = 8.0$  Hz, 2H), 6.62 (dd,  $J_1 = 9.2$  Hz,  $J_2 = 47.2$  Hz, 1H), 5.47 (dd,  $J_1 = 9.6$  Hz,  $J_2 = 14.0$  Hz, 1H).  $^{13}\text{C}$  NMR (150 MHz,  $\text{CDCl}_3$ )  $\delta$  166.98, 163.33 (d,  $J = 1.6$  Hz), 139.02 (d,  $J = 19.2$  Hz), 134.90, 132.66, 130.87, 127.65 (d,  $J = 6.0$  Hz), 124.05, 117.79, 114.16 (d,  $J = 2.4$  Hz), 90.65 (d,  $J = 172.4$  Hz), 56.32 (d,  $J = 34.6$  Hz).  $^{19}\text{F}$  NMR (376 MHz,  $\text{CDCl}_3$ )  $\delta$  -56.38 (t,  $J = 21.4$  Hz, 3F), -140.32-(-140.52) (m, 2F), -142.19-(-142.28) (m, 2F), -169.60 (s, 1F). HRMS (ESI-TOF) Calcd for  $\text{C}_{25}\text{H}_{10}\text{F}_8\text{N}_3\text{O}_3$  [M-H] $^-$ : 552.0600, found: 552.0604.

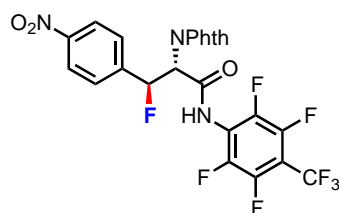

**(2*R*,3*S*)-2-(1,3-dioxisoindolin-2-yl)-3-fluoro-3-(4-nitrophenyl)-*N*-(2,3,5,6-tetrafluoro-4-(trifluoromethyl)phenyl)propanamide (2j)**

Substrate **1j** was fluorinated following the general fluorination procedure. Analysis of crude reaction mixture by  $^1\text{H}$  NMR showed a > 20:1 diastereomer ratio. After purification by preparative thin-layer chromatography, **2j** was obtained as a white solid (29.8 mg, 52%).  $^1\text{H}$  NMR (400 MHz,  $\text{CDCl}_3$ )  $\delta$  8.22 (br d,  $J = 8.8$  Hz, 1H), 8.19 (d,  $J = 8.8$  Hz, 2H), 7.81-7.78 (m, 2H), 7.75-7.72 (m, 2H), 7.63 (d,  $J = 8.0$  Hz, 2H), 6.69 (dd,  $J_1 = 9.6$  Hz,  $J_2 = 47.2$  Hz, 1H), 5.50 (dd,  $J_1 = 9.6$  Hz,  $J_2 = 14.0$  Hz, 1H).  $^{13}\text{C}$  NMR (150 MHz,  $\text{CDCl}_3$ )  $\delta$  167.02, 163.19 (d,  $J = 1.6$  Hz), 148.90 (d,  $J = 2.1$  Hz), 140.76 (d,  $J = 19.2$  Hz), 134.94, 130.88, 128.01 (d,  $J = 6.0$  Hz), 124.13, 124.10, 90.48 (d,  $J = 172.4$  Hz), 56.42 (d,  $J = 34.6$  Hz).  $^{19}\text{F}$  NMR (376 MHz,  $\text{CDCl}_3$ )  $\delta$  -56.37 (t,  $J = 21.4$  Hz, 3F), -140.18-(-140.43) (m, 2F), -142.16-(-142.25) (m, 2F), -169.29 (s, 1F). HRMS (ESI-TOF) Calcd for  $\text{C}_{24}\text{H}_{10}\text{F}_8\text{N}_3\text{O}_5$  [M-H] $^-$ : 572.0498, found: 572.0502.

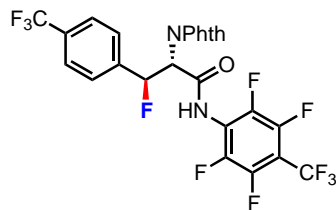

**(2*R*,3*S*)-2-(1,3-dioxisoindolin-2-yl)-3-fluoro-*N*-(2,3,5,6-tetrafluoro-4-(trifluoromethyl)phenyl)-3-(4-(trifluoromethyl)phenyl)propanamide (2k)**

Substrate **1k** was fluorinated following the general fluorination procedure. Analysis of crude reaction mixture by  $^1\text{H}$  NMR showed a > 20:1 diastereomer ratio. After purification by preparative thin-layer chromatography, **2k** was obtained as a white solid (45.0 mg, 76%).  $^1\text{H}$  NMR (400 MHz,  $\text{CDCl}_3$ )  $\delta$  8.25 (br d,  $J = 10.4$  Hz, 1H), 7.80-7.78 (m, 2H), 7.73-7.71 (m, 2H), 7.61-7.55 (m, 4H), 6.71 (dd,  $J_1 = 9.2$  Hz,  $J_2 = 47.2$  Hz, 1H), 5.51 (dd,  $J_1 = 10.0$  Hz,  $J_2 = 13.6$  Hz, 1H).  $^{13}\text{C}$  NMR (150 MHz,  $\text{CDCl}_3$ )  $\delta$  167.09, 163.49 (d,  $J = 2.2$  Hz), 137.86 (d,  $J = 19.4$  Hz), 134.79, 132.34 (qd,  $J_1 = 2.8$  Hz,  $J_2 = 32.7$  Hz), 131.01, 127.47 (d,  $J = 5.6$  Hz), 125.97 (q,  $J = 3.4$  Hz), 124.03, 123.48 (q,  $J = 270.8$  Hz), 91.00 (d,  $J = 170.7$  Hz), 56.40 (d,  $J = 35.1$  Hz).  $^{19}\text{F}$  NMR (376 MHz,  $\text{CDCl}_3$ )  $\delta$  -56.37 (t,  $J = 21.8$  Hz, 3F), -63.26 (s, 3F), -140.31-(-140.52) (m, 2F), -142.18-(-142.25) (m, 2F), -167.26 (s, 1F). HRMS (ESI-TOF) Calcd for  $\text{C}_{25}\text{H}_{10}\text{F}_{11}\text{N}_2\text{O}_3$   $[\text{M}-\text{H}]^-$ : 595.0521, found: 595.0519.

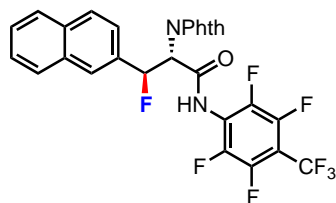

**(2*R*,3*S*)-2-(1,3-dioxisoindolin-2-yl)-3-fluoro-3-(naphthalen-2-yl)-*N*-(2,3,5,6-tetrafluoro-4-(trifluoromethyl)phenyl)propanamide (2l)**

Substrate **1l** was fluorinated following the general fluorination procedure. Analysis of crude reaction mixture by  $^1\text{H}$  NMR showed a > 7:1 diastereomer ratio. After purification by preparative thin-layer chromatography, **2l** was obtained as a major diastereoisomer and as a white solid (30.7 mg, 53%).  $^1\text{H}$  NMR (400 MHz,  $\text{CDCl}_3$ )  $\delta$  8.37 (br d,  $J = 11.2$  Hz, 1H), 7.89 (s, 1H), 7.84-7.77 (m, 3H), 7.72-7.70 (m, 2H), 7.63-7.61 (m, 2H), 7.55 (d,  $J = 8.4$  Hz, 1H), 7.51-7.45 (m, 2H), 6.76 (dd,  $J_1 = 10.0$  Hz,  $J_2 = 48.0$  Hz, 1H), 5.68 (dd,  $J_1 = 10.0$  Hz,  $J_2 = 13.2$  Hz, 1H).  $^{13}\text{C}$  NMR (150 MHz,  $\text{CDCl}_3$ )  $\delta$  167.10, 164.01 (d,  $J = 2.6$  Hz), 134.48, 133.99 (d,  $J = 1.8$  Hz), 132.69, 131.14 (d,  $J = 18.4$  Hz), 131.12, 129.19, 128.39, 128.14 (d,  $J = 7.0$  Hz), 127.74, 127.27, 126.71, 123.85, 123.02 (d,  $J = 4.4$  Hz), 92.31 (d,  $J = 168.3$  Hz), 56.24 (d,  $J = 36.2$  Hz).  $^{19}\text{F}$  NMR (376 MHz,  $\text{CDCl}_3$ )  $\delta$  -56.33 (t,  $J = 21.8$  Hz, 3F), -140.44-(-140.72) (m, 2F), -142.11-(-142.20) (m, 2F), -162.59 (s, 1F). HRMS (ESI-TOF) Calcd for  $\text{C}_{28}\text{H}_{13}\text{F}_8\text{N}_2\text{O}_3$   $[\text{M}-\text{H}]^-$ : 557.0804, found: 557.0806.

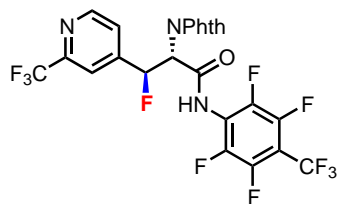

**(2R,3S)-2-(1,3-dioxoisindolin-2-yl)-3-fluoro-N-(2,3,5,6-tetrafluoro-4-(trifluoromethyl)phenyl)-3-(2-(trifluoromethyl)pyridin-4-yl)propanamide (2m)**

Substrate **1m** was fluorinated following the general fluorination procedure. Analysis of crude reaction mixture by  $^1\text{H}$  NMR showed a > 20:1 diastereomer ratio. A 2:1 mixture of **2m** to elimination byproduct was obtained after purification by preparative thin-layer chromatography,<sup>3</sup> **2m** and elimination byproduct were obtained as a colorless oil (25.9 mg, 43%).  $^1\text{H}$  NMR (600 MHz,  $\text{CDCl}_3$ )  $\delta$  8.73 (d,  $J = 4.8$  Hz, 1H), 8.15 (br d,  $J = 7.2$  Hz, 1H), 7.83-7.82 (m, 2H), 7.77-7.76 (m, 2H), 7.72 (s, 1H), 7.55 (d,  $J = 4.8$  Hz, 1H), 6.67 (dd,  $J_1 = 9.0$  Hz,  $J_2 = 47.4$  Hz, 1H), 5.47 (dd,  $J_1 = 9.0$  Hz,  $J_2 = 14.4$  Hz, 1H).  $^{13}\text{C}$  NMR (150 MHz,  $\text{CDCl}_3$ )  $\delta$  167.08, 165.92, 150.78, 149.20 (qd,  $J_1 = 7.6$  Hz,  $J_2 = 35.0$  Hz), 144.96 (d,  $J = 20.1$  Hz), 135.13, 130.81, 124.24, 123.92 (d,  $J = 6.0$  Hz), 120.93 (q,  $J = 273.0$  Hz), 118.05 (qd,  $J_1 = 3.0$  Hz,  $J_2 = 5.6$  Hz), 89.61 (d,  $J = 174.8$  Hz), 56.37 (d,  $J = 33.4$  Hz).  $^{19}\text{F}$  NMR (376 MHz,  $\text{CDCl}_3$ )  $\delta$  -56.38 (t,  $J = 21.4$  Hz, 3F), -68.49 (s, 3F), -140.06-(-140.33) (m, 2F), -142.14-(-142.26) (m, 2F), -175.06 (s, 1F). HRMS (ESI-TOF) Calcd for  $\text{C}_{24}\text{H}_9\text{F}_{11}\text{N}_3\text{O}_3$   $[\text{M-H}]^-$ : 596.0474, found: 596.0471.

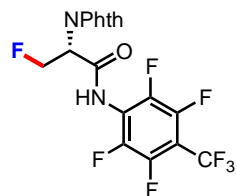

**(R)-2-(1,3-dioxoisindolin-2-yl)-3-fluoro-N-(2,3,5,6-tetrafluoro-4-(trifluoromethyl)phenyl)propanamide (2n)**

Substrate **1n** was fluorinated following this procedure: Substrate **1n** (0.10 mmol, 43.4 mg), Selectfluor (0.125 mmol, 44.3 mg),  $\text{Pd}(\text{OAc})_2$  (0.01 mmol, 2.3 mg) and **L5** (0.02 mmol, 5.4 mg) were weighed into a tube (10 mL) with a magnetic stir bar under air. 1,4-Dioxane (1.25 mL) was added, and the tube was sealed with a cap. The reaction mixture was stirred at 115  $^\circ\text{C}$  for 15 hours. Upon completion, the reaction mixture was cooled to room temperature and diluted with EtOAc. Then the reaction mixture was filtered through a short celite tube and purified by preparative thin-layer chromatography using toluene/EtOAc mixtures as the eluent. After purification by preparative thin-layer chromatography, **2n** was obtained as a colorless oil (29.4 mg, 65%).  $^1\text{H}$  NMR (400 MHz,  $\text{CDCl}_3$ )  $\delta$  8.03 (br d,  $J = 3.6$  Hz, 1H), 7.94-7.92 (m, 2H), 7.82-7.80 (m, 2H), 5.44-5.23 (m, 2H), 5.05 (ddd,  $J_1 = 6.8$  Hz,  $J_2 = 9.6$  Hz,  $J_3 = 46.0$  Hz, 1H).  $^{13}\text{C}$  NMR (150 MHz,  $\text{CDCl}_3$ )  $\delta$  167.47, 164.04 (d,  $J = 4.8$  Hz), 134.92, 131.38, 124.12, 80.06 (d,  $J = 171.8$  Hz), 53.08 (d,  $J = 24.0$  Hz).  $^{19}\text{F}$  NMR (376 MHz,  $\text{CDCl}_3$ )  $\delta$  -56.38 (t,  $J = 21.8$  Hz, 3F), -140.29-(-140.55) (m, 2F), -142.36-(-142.45) (m, 2F), -222.21 (s, 1F). HRMS (ESI-TOF) Calcd for  $\text{C}_{18}\text{H}_7\text{F}_8\text{N}_2\text{O}_3$   $[\text{M-H}]^-$ : 451.0334, found: 451.0336.

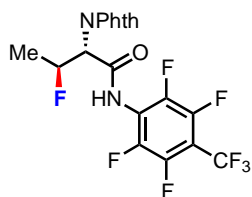

**(2R,3S)-2-(1,3-dioxoisindolin-2-yl)-3-fluoro-N-(2,3,5,6-tetrafluoro-4-(trifluoromethyl)phenyl)butanamide (2o)**

Substrate **1o** was fluorinated following the general fluorination procedure. Analysis of crude reaction mixture by  $^1\text{H}$  NMR showed a > 20:1 diastereomer ratio. After purification by preparative thin-layer chromatography, **2o** was obtained as a white solid (24.7 mg, 53%).  $^1\text{H}$  NMR (600 MHz,  $\text{CDCl}_3$ )  $\delta$  8.20 (br d,  $J = 12.0$  Hz, 1H), 7.92-7.91 (m, 2H), 7.80-7.79 (m, 2H), 5.87-5.75 (m, 1H), 5.10 (dd,  $J_1 = 9.0$  Hz,  $J_2 = 13.8$  Hz, 1H), 1.50 (dd,  $J_1 = 6.0$  Hz,  $J_2 = 25.8$  Hz, 3H).  $^{13}\text{C}$  NMR (150 MHz,  $\text{CDCl}_3$ )  $\delta$  167.46, 164.08 (d,  $J = 2.0$  Hz), 134.76, 131.47, 124.06, 88.87 (d,  $J = 165.0$  Hz), 57.13 (d,  $J = 30.2$  Hz), 18.77 (d,  $J = 21.9$  Hz).  $^{19}\text{F}$  NMR (376 MHz,  $\text{CDCl}_3$ )  $\delta$  -56.36 (t,  $J = 22.2$  Hz, 3F), -140.52-(-140.81) (m, 2F), -142.23-(-142.34) (m, 2F), -172.07 (s, 1F). HRMS (ESI-TOF) Calcd for  $\text{C}_{19}\text{H}_9\text{F}_8\text{N}_2\text{O}_3$  [M-H] $^-$ : 465.0491, found: 465.0490.

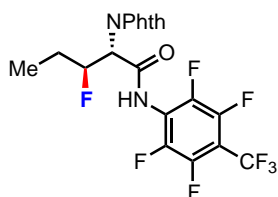

**(2R,3S)-2-(1,3-dioxoisindolin-2-yl)-3-fluoro-N-(2,3,5,6-tetrafluoro-4-(trifluoromethyl)phenyl)pentanamide (2p)**

Substrate **1p** was fluorinated following the general fluorination procedure but using 20 mol% **L10** and adding 1.0 equiv of  $\text{KHCO}_3$ . Analysis of crude reaction mixture by  $^1\text{H}$  NMR showed a > 20:1 diastereomer ratio. After purification by preparative thin-layer chromatography, **2p** was obtained as a white solid (14.4 mg, 30%).  $^1\text{H}$  NMR (600 MHz,  $\text{CDCl}_3$ )  $\delta$  8.24 (br d,  $J = 12.6$  Hz, 1H), 7.92-7.91 (m, 2H), 7.80-7.79 (m, 2H), 5.64 (dt,  $J_1 = 8.4$  Hz,  $J_2 = 49.2$  Hz, 1H), 5.16 (dd,  $J_1 = 10.2$  Hz,  $J_2 = 13.2$  Hz, 1H), 1.89-1.66 (m, 2H), 1.08 (t,  $J = 7.8$  Hz, 3H).  $^{13}\text{C}$  NMR (150 MHz,  $\text{CDCl}_3$ )  $\delta$  167.49, 164.34 (d,  $J = 2.0$  Hz), 134.74, 131.50, 124.04, 92.56 (d,  $J = 167.4$  Hz), 55.57 (d,  $J = 30.4$  Hz), 25.48 (d,  $J = 20.8$  Hz), 8.06 (d,  $J = 4.4$  Hz).  $^{19}\text{F}$  NMR (376 MHz,  $\text{CDCl}_3$ )  $\delta$  -56.36 (t,  $J = 21.8$  Hz, 3F), -140.57-(-140.82) (m, 2F), -142.24-(-142.34) (m, 2F), -183.02 (s, 1F). HRMS (ESI-TOF) Calcd for  $\text{C}_{20}\text{H}_{11}\text{F}_8\text{N}_2\text{O}_3$  [M-H] $^-$ : 479.0647, found: 479.0644.

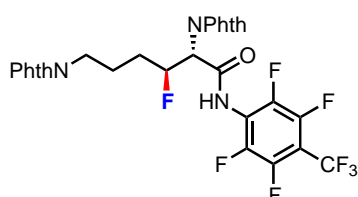

**(2R,3S)-2,6-bis(1,3-dioxoisindolin-2-yl)-3-fluoro-N-(2,3,5,6-tetrafluoro-4-(trifluoromethyl)phenyl)hexanamide (2q)**

Substrate **1q** was fluorinated following the general fluorination procedure but using 20 mol% **L10** and adding 1.0 equiv of  $\text{KHCO}_3$ . Analysis of crude reaction mixture by  $^1\text{H}$  NMR showed a > 20:1 diastereomer ratio. After purification by preparative thin-layer chromatography, **2q** was obtained as a white solid (16.0 mg, 25%).  $^1\text{H}$  NMR (600 MHz,  $\text{CDCl}_3$ )  $\delta$  8.27 (br d,  $J = 11.4$  Hz, 1H), 7.89-7.88 (m, 2H), 7.80-7.77 (m, 4H), 7.71-7.69 (m, 2H), 5.76-5.64 (m, 1H), 5.15 (dd,  $J_1 = 9.0$  Hz,  $J_2 = 13.2$  Hz, 1H), 3.70 (t,  $J = 7.2$  Hz, 2H), 2.01-1.76 (m, 4H).  $^{13}\text{C}$  NMR (150 MHz,  $\text{CDCl}_3$ )  $\delta$  168.22, 167.46, 164.01, 134.73, 134.00, 131.90, 131.45, 124.07, 123.25, 91.07 (d,  $J = 168.6$  Hz), 55.89 (d,  $J = 29.7$  Hz), 37.12, 29.59 (d,  $J = 20.6$  Hz), 23.28 (d,  $J = 3.2$  Hz).  $^{19}\text{F}$  NMR (376 MHz,  $\text{CDCl}_3$ )  $\delta$  -56.36 (t,  $J = 21.8$  Hz, 3F), -140.57-(-140.81) (m, 2F), -142.15-(-142.22) (m, 2F), -181.85 (s, 1F). HRMS (ESI-TOF) Calcd for  $\text{C}_{29}\text{H}_{16}\text{F}_8\text{N}_3\text{O}_5$  [M-H] $^-$ : 638.0968, found: 638.0967.

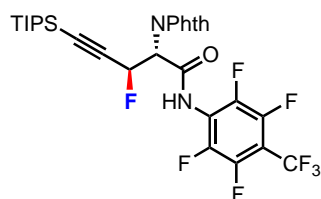

**(2R,3S)-2-(1,3-dioxoisindolin-2-yl)-3-fluoro-N-(2,3,5,6-tetrafluoro-4-(trifluoromethyl)phenyl)-5-(triisopropylsilyl)pent-4-ynamide (2r)**

Substrate **1r** was fluorinated following this procedure: Substrate **1r** (0.10 mmol, 61.6 mg), Selectfluor (0.125 mmol, 44.3 mg),  $\text{Pd}(\text{OAc})_2$  (0.01 mmol, 2.3 mg) and **L5** (0.02 mmol, 5.4 mg) were weighed into a tube (10 mL) with a magnetic stir bar under air. 1,4-Dioxane (1.25 mL) was added, and the tube was sealed with a cap. The reaction mixture was stirred at 115  $^\circ\text{C}$  for 15 hours. Upon completion, the reaction mixture was cooled to room temperature and diluted with EtOAc. Then the reaction mixture was filtered through a short celite tube and purified by preparative thin-layer chromatography using toluene/EtOAc mixtures as the eluent. Analysis of crude reaction mixture by  $^1\text{H}$  NMR showed a > 20:1 diastereomer ratio. After purification by preparative thin-layer chromatography, **2r** was obtained as a colorless oil (31.7 mg, 50%).  $^1\text{H}$  NMR (400 MHz,  $\text{CDCl}_3$ )  $\delta$  8.00 (br d,  $J = 8.4$  Hz, 1H), 7.91-7.89 (m, 2H), 7.80-7.76 (m, 2H), 6.30 (dd,  $J_1 = 9.2$  Hz,  $J_2 = 49.6$  Hz, 1H), 5.31 (dd,  $J_1 = 9.6$  Hz,  $J_2 = 13.2$  Hz, 1H), 0.86 (s, 21H).  $^{13}\text{C}$  NMR (150 MHz,  $\text{CDCl}_3$ )  $\delta$  166.88, 162.90 (d,  $J = 2.6$  Hz), 134.69, 131.57, 123.98, 97.53 (d,  $J = 22.5$  Hz), 95.37 (d,  $J = 8.8$  Hz), 80.43 (d,  $J = 170.0$  Hz), 55.70 (d,  $J = 32.2$  Hz), 18.15, 10.71.  $^{19}\text{F}$  NMR (376 MHz,  $\text{CDCl}_3$ )  $\delta$  -56.38 (t,  $J = 21.4$  Hz, 3F), -140.39-(-140.59) (m, 2F), -142.18-(-142.28) (m, 2F), -170.11 (s, 1F). HRMS (ESI-TOF) Calcd for  $\text{C}_{29}\text{H}_{27}\text{F}_8\text{N}_2\text{O}_3\text{Si}$  [M-H] $^-$ : 631.0742, found: 631.0745.

## References

- (1) He, J.; Li, S.-H.; Deng, Y.-Q.; Fu, H.-Y.; Laforteza, B. N.; Spangler, J. E.; Homs, A.; Yu, J.-Q. *Science* **2014**, *343*, 1216.
- (2) Li, S.-H.; Chen, G.; Feng, C.-G.; Gong, W.; Yu, J.-Q. *J. Am. Chem. Soc.* **2014**, *136*, 5267.
- (3) Xia, J.-B.; Zhu, C.; Chen, C. *J. Am. Chem. Soc.* **2013**, *135*, 9342.

## <sup>1</sup>H and <sup>13</sup>C NMR Spectra

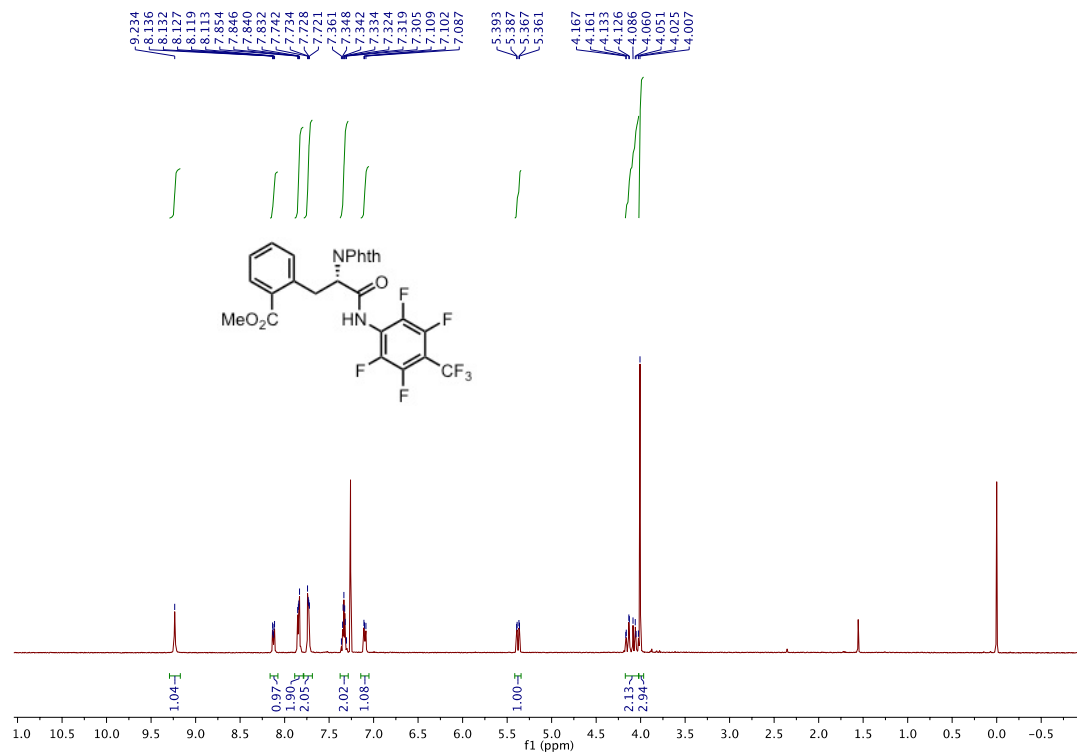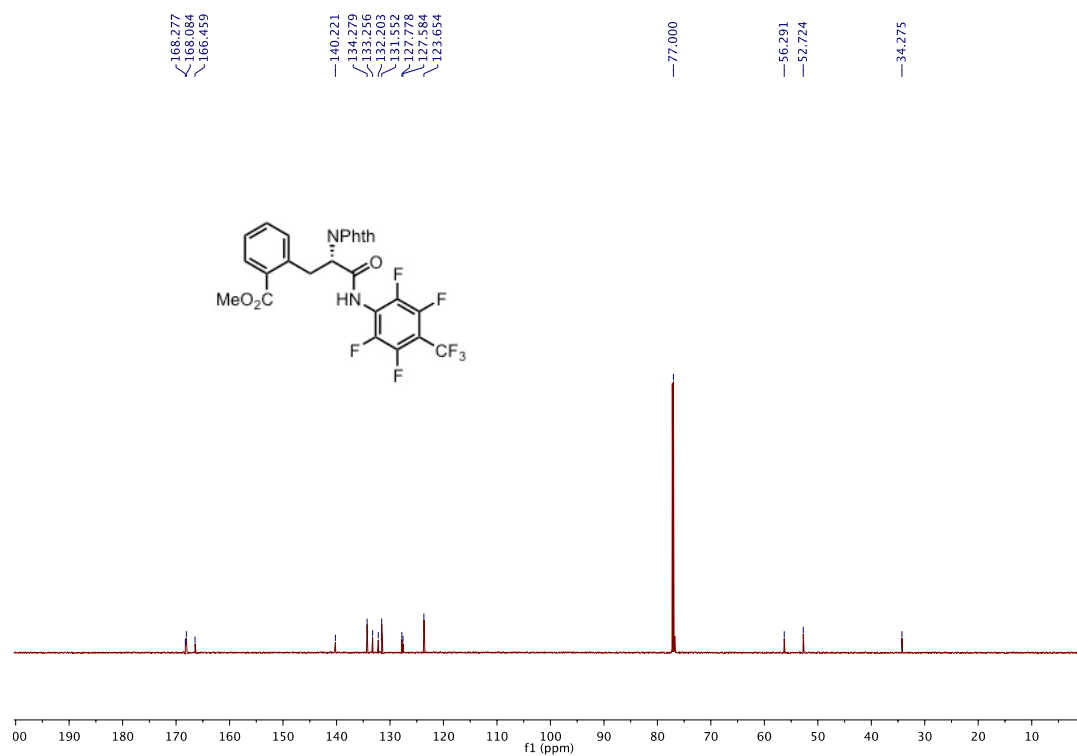

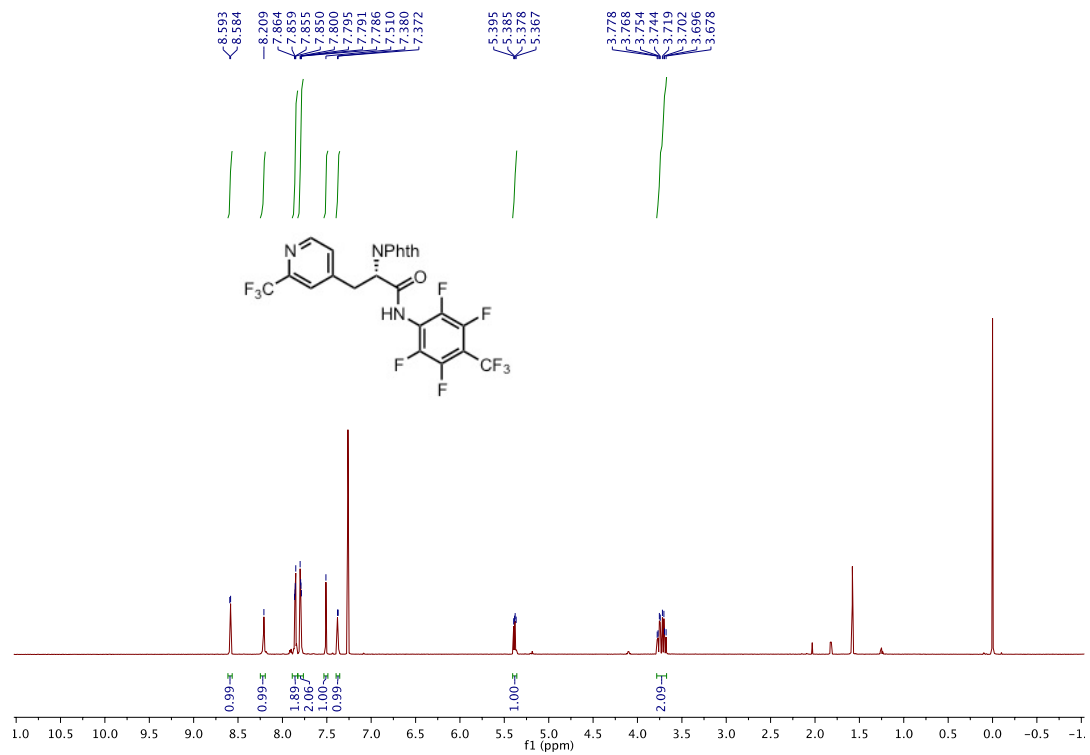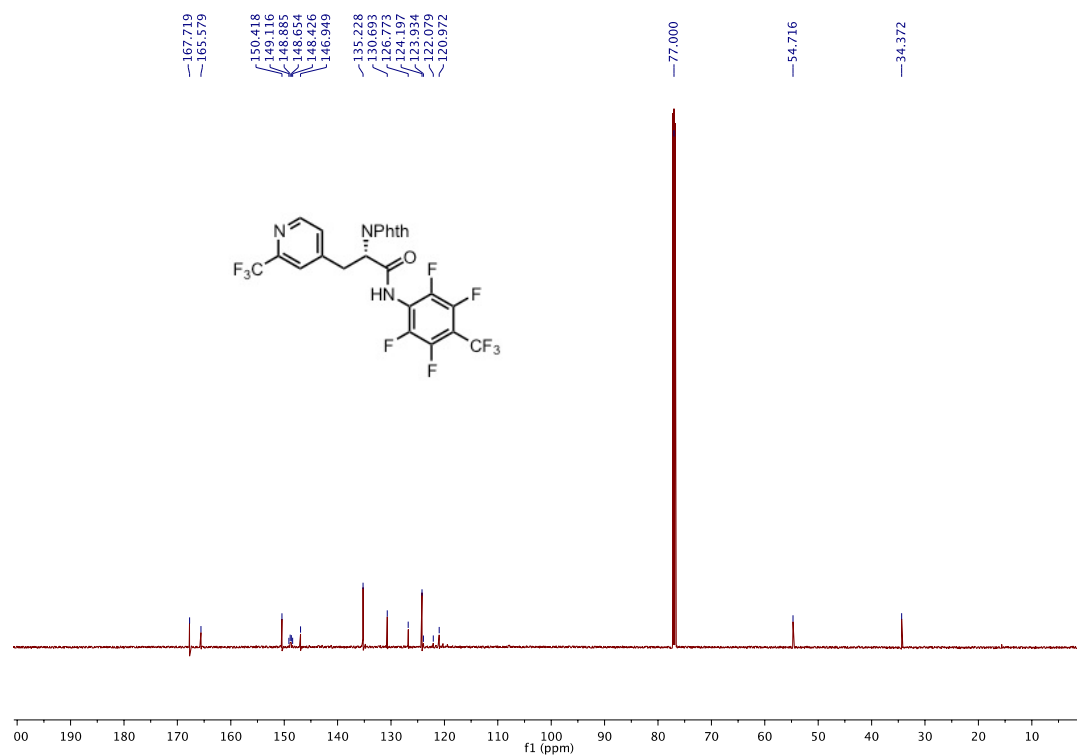



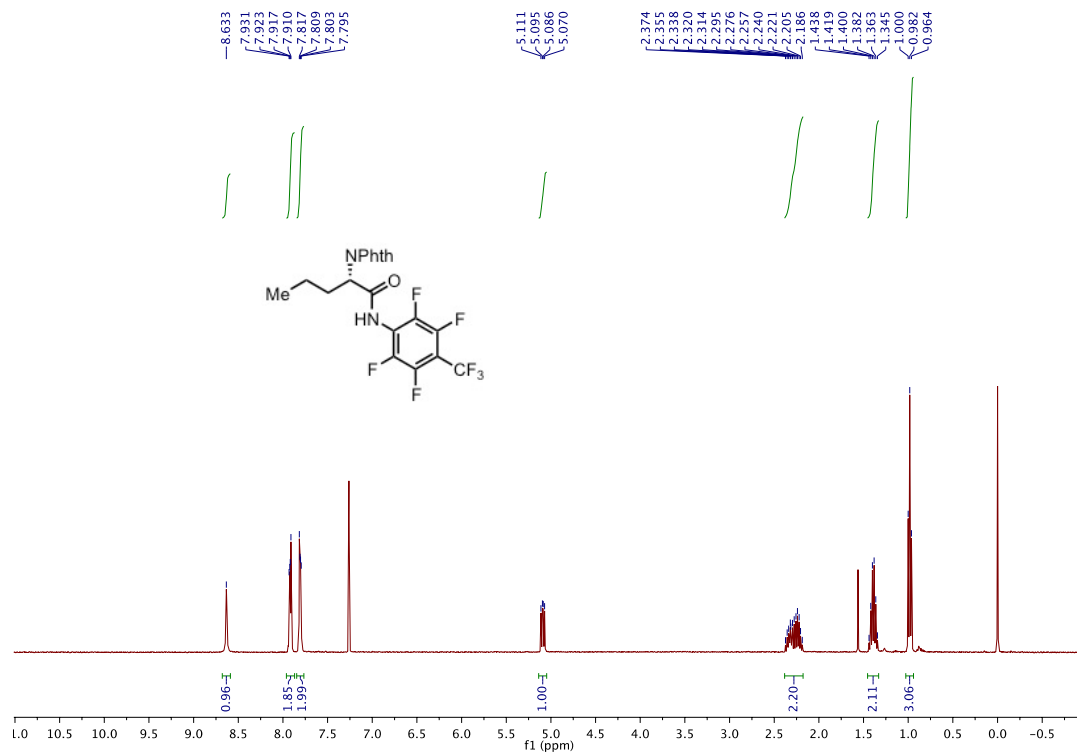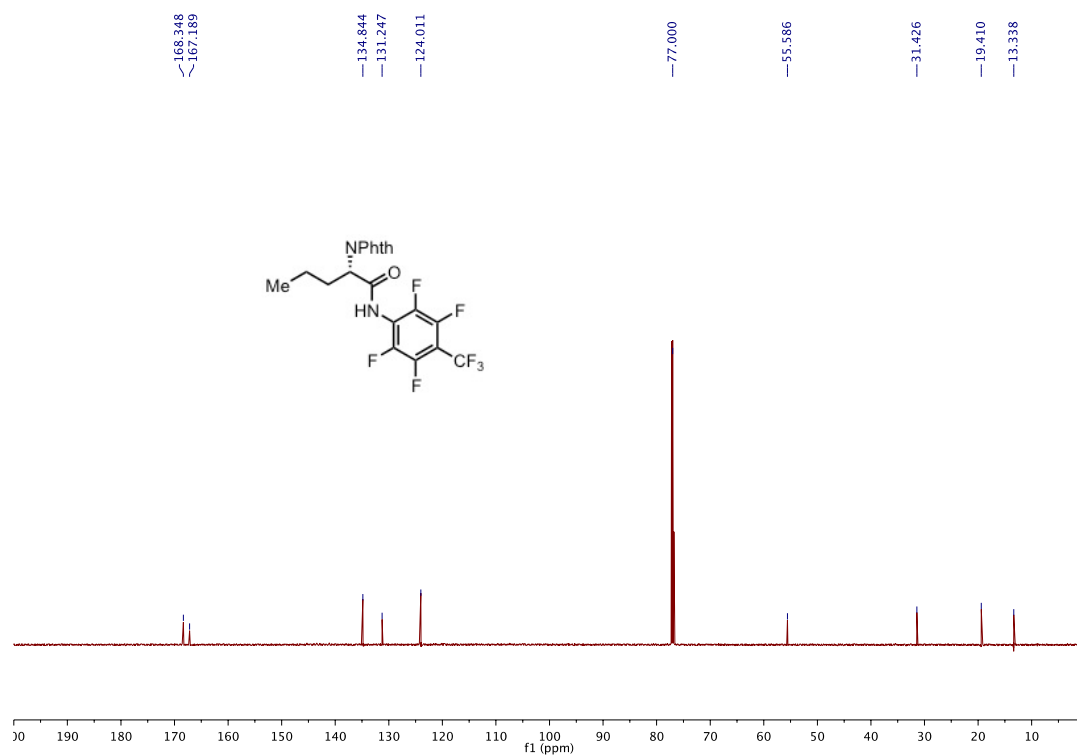

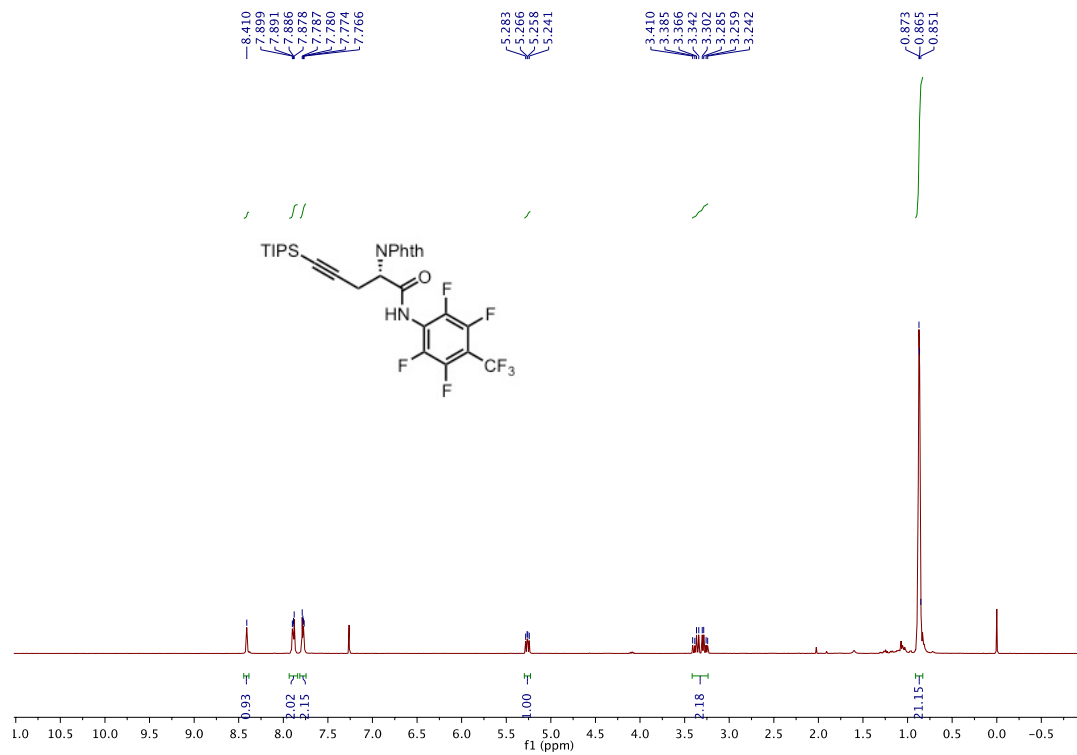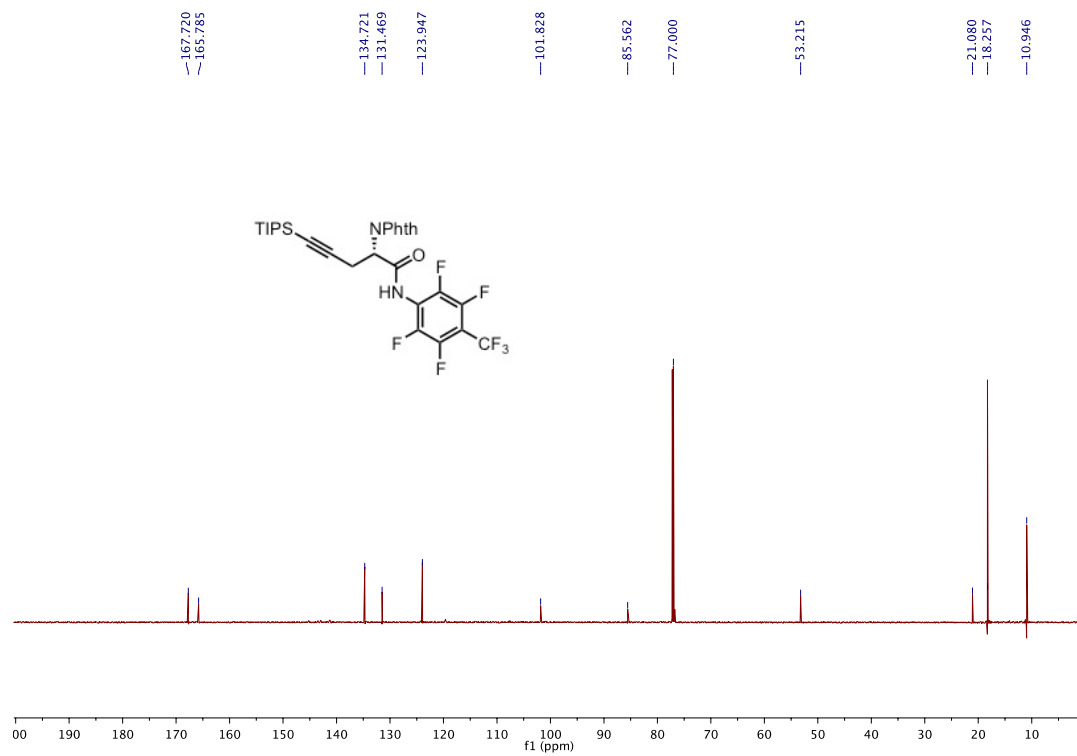

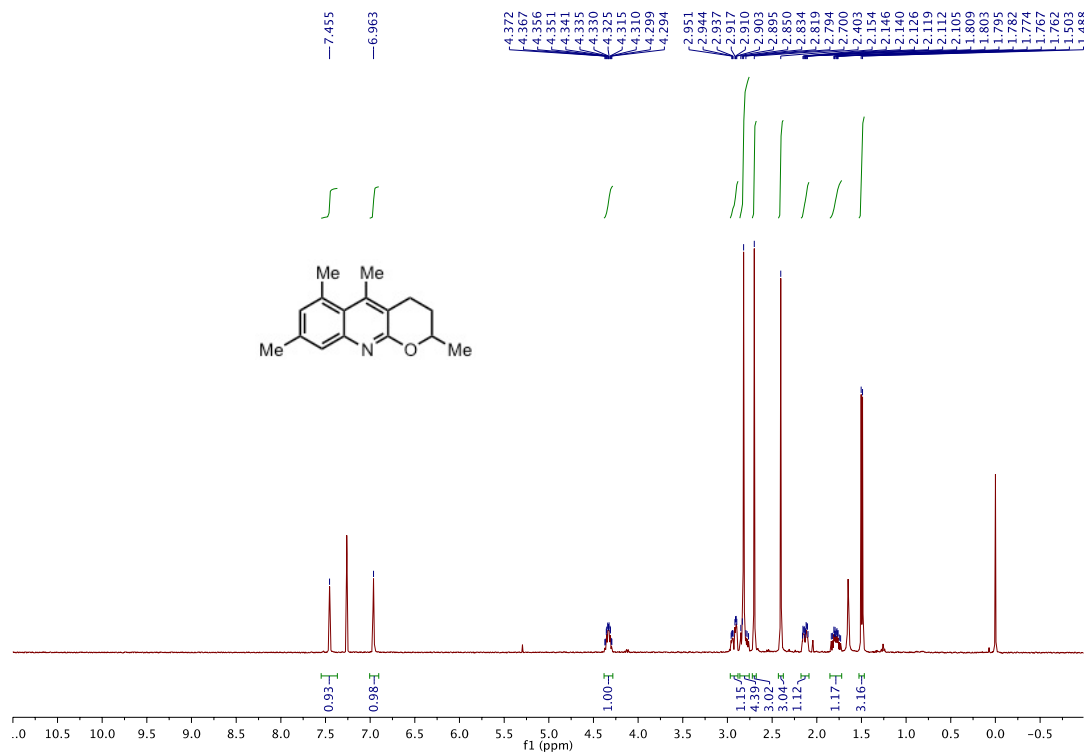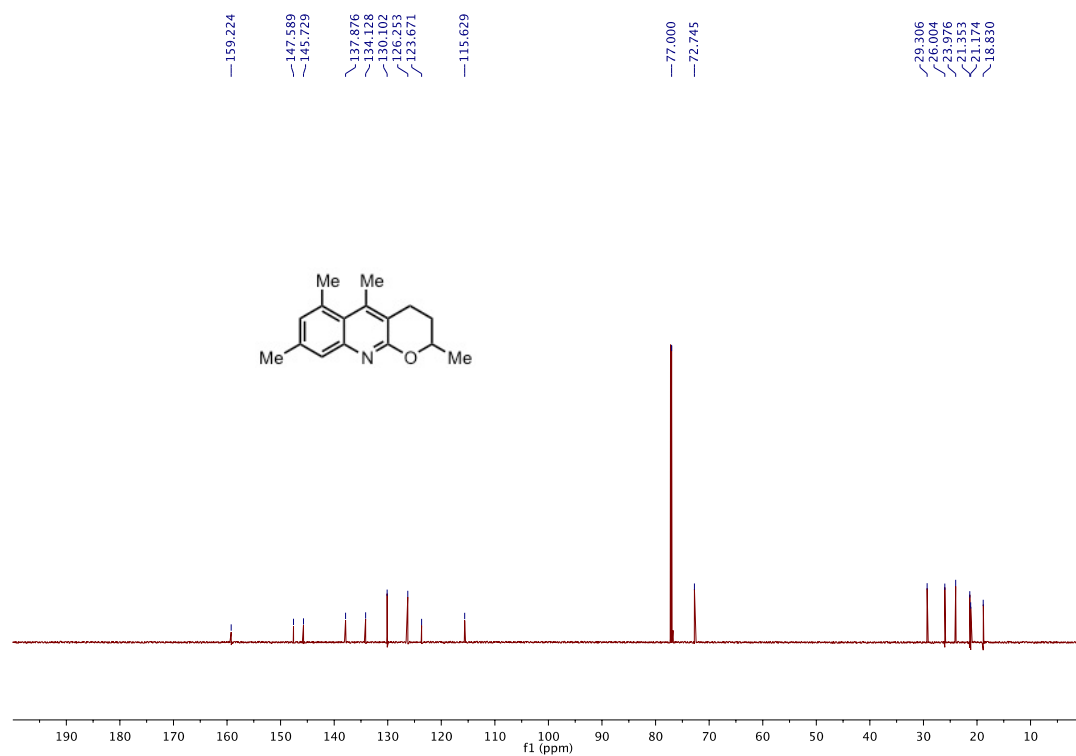

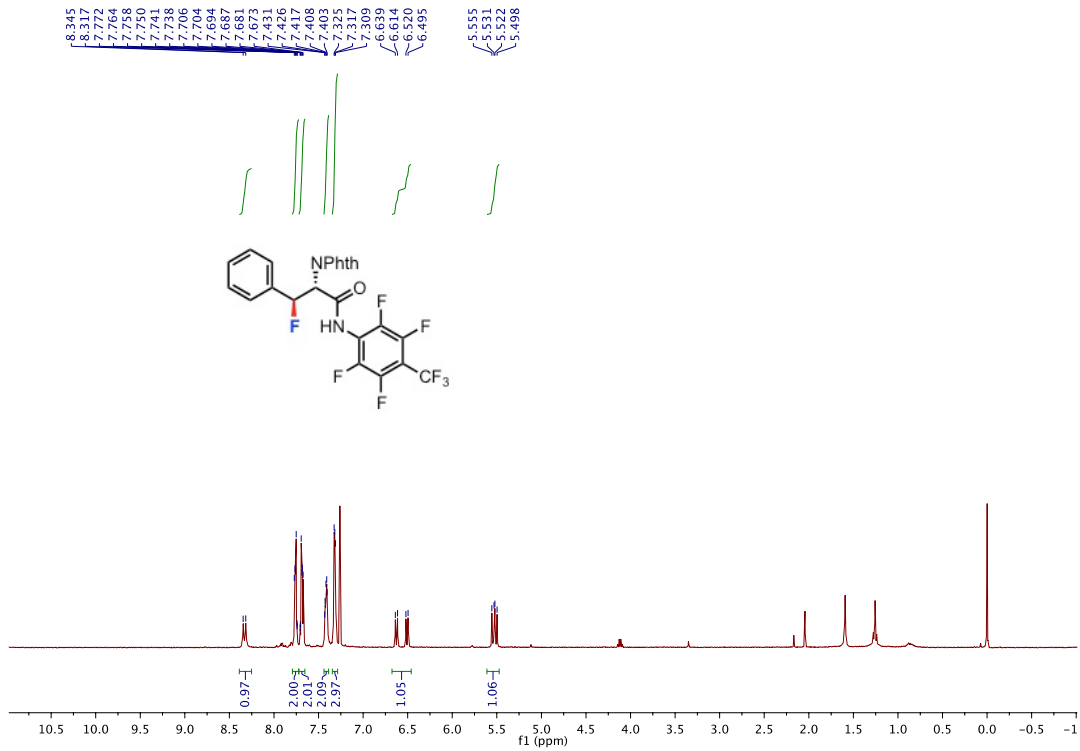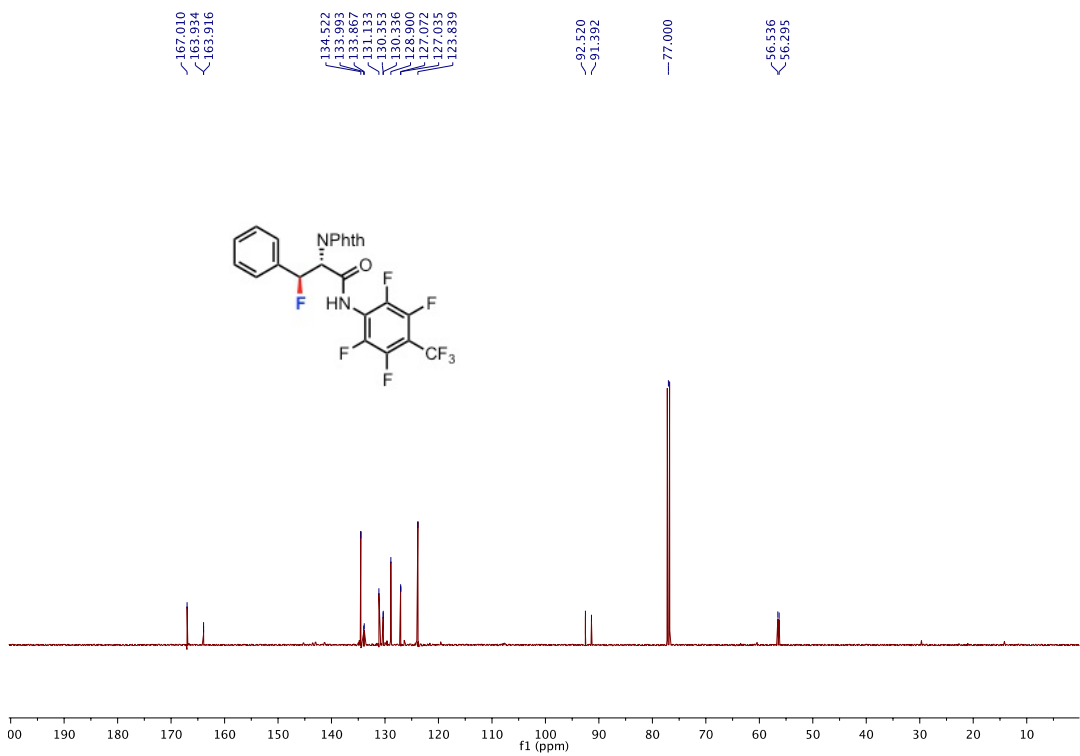

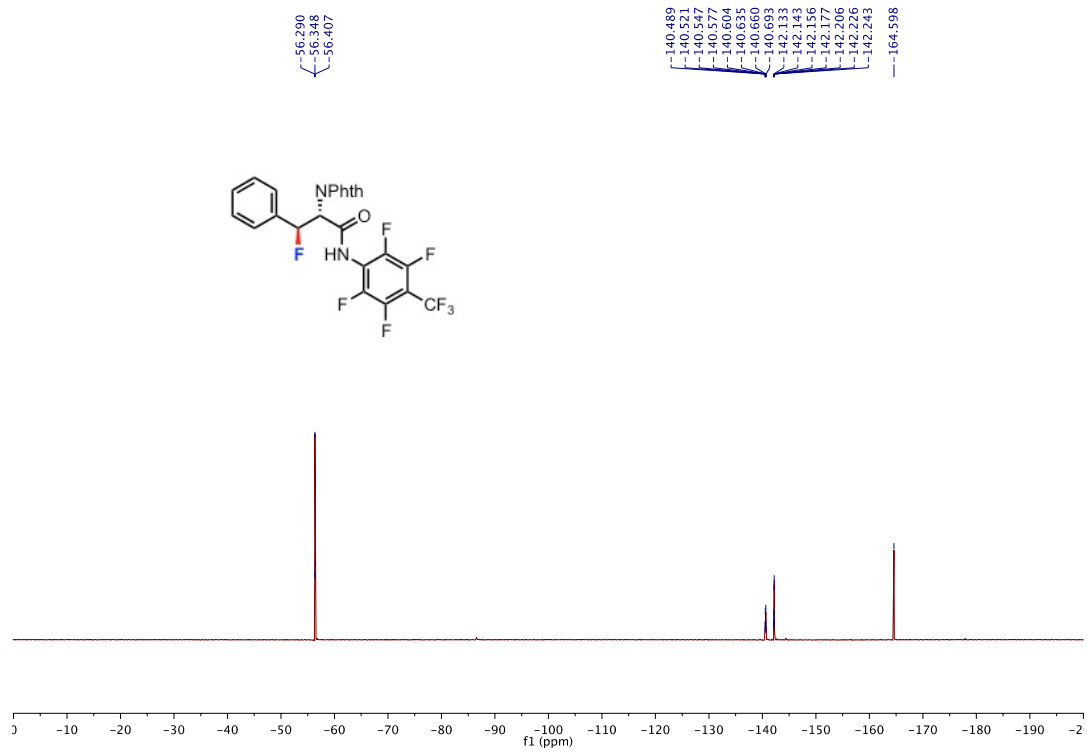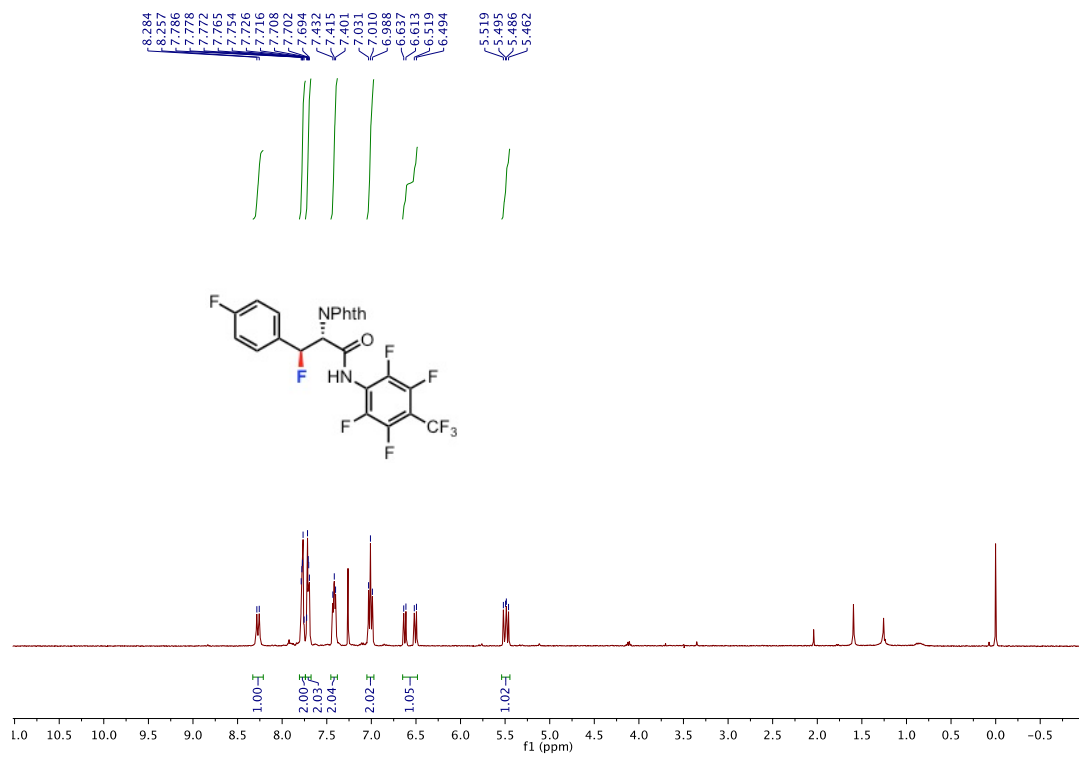

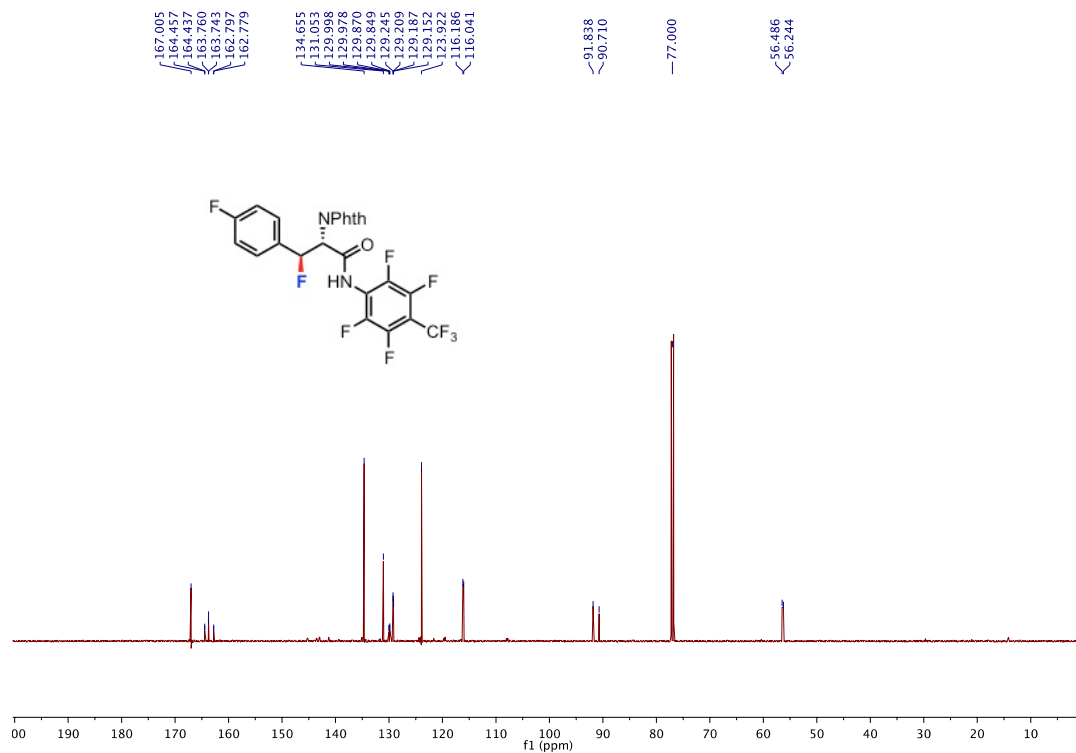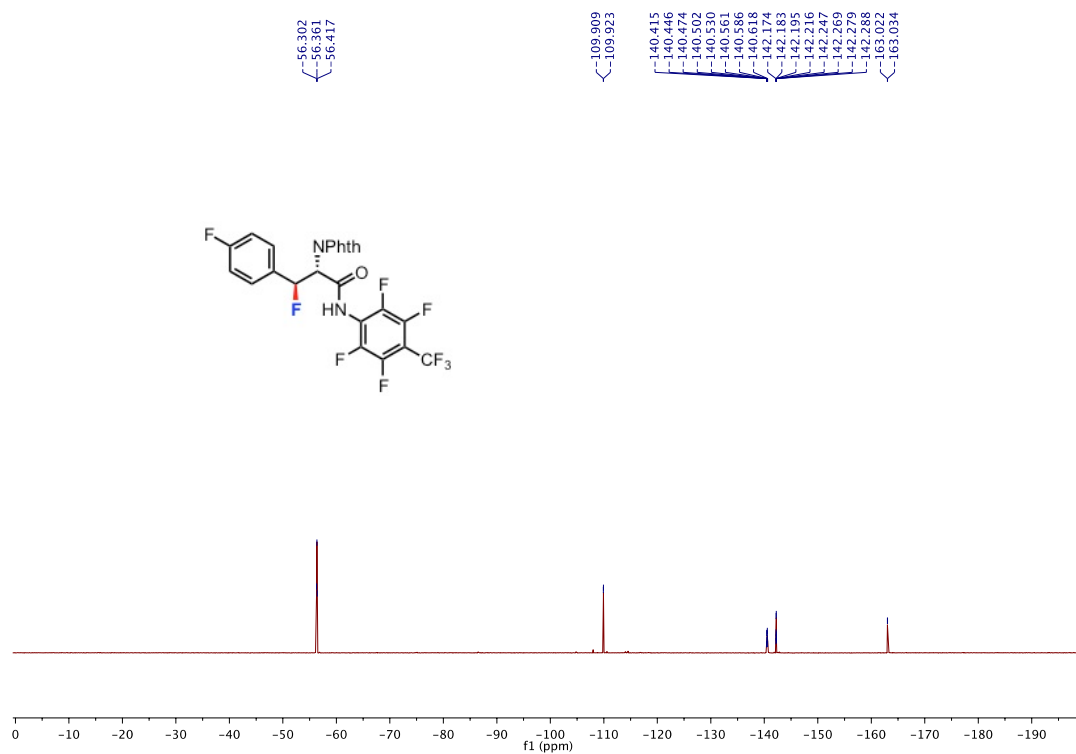

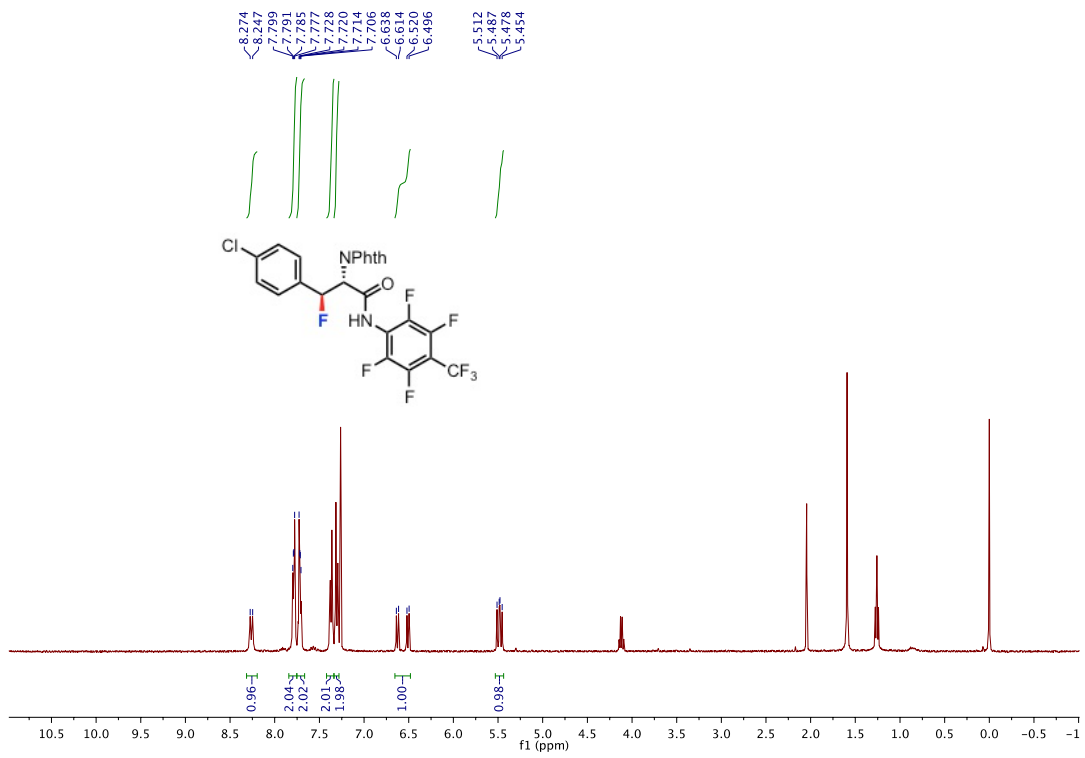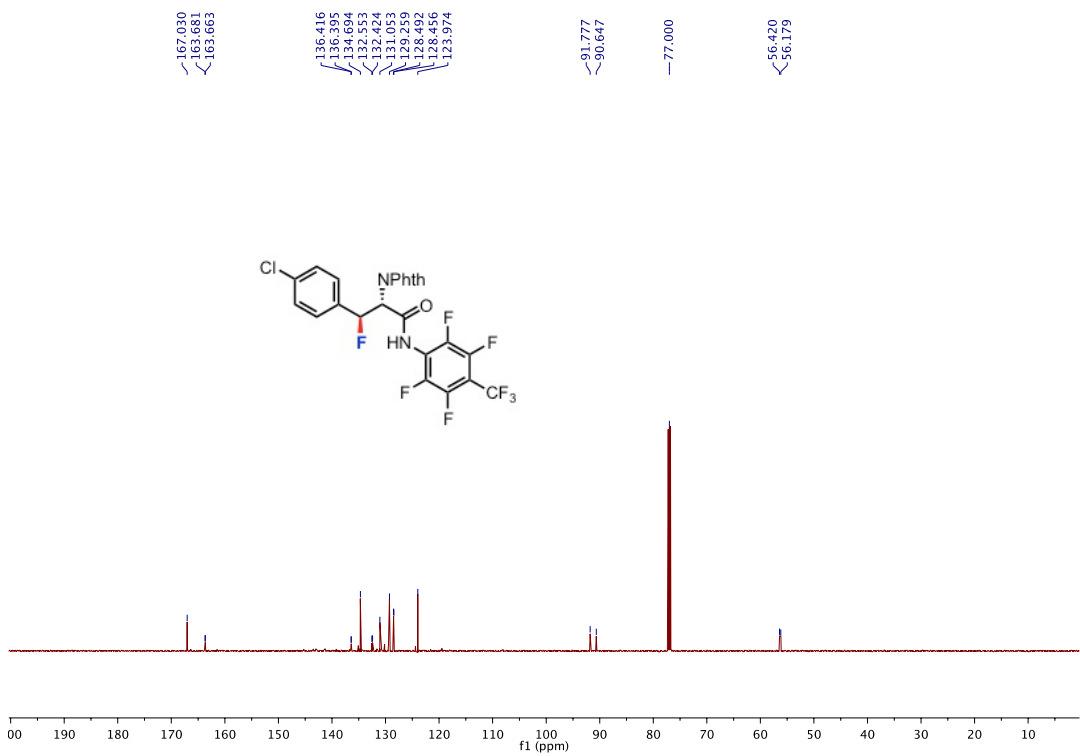

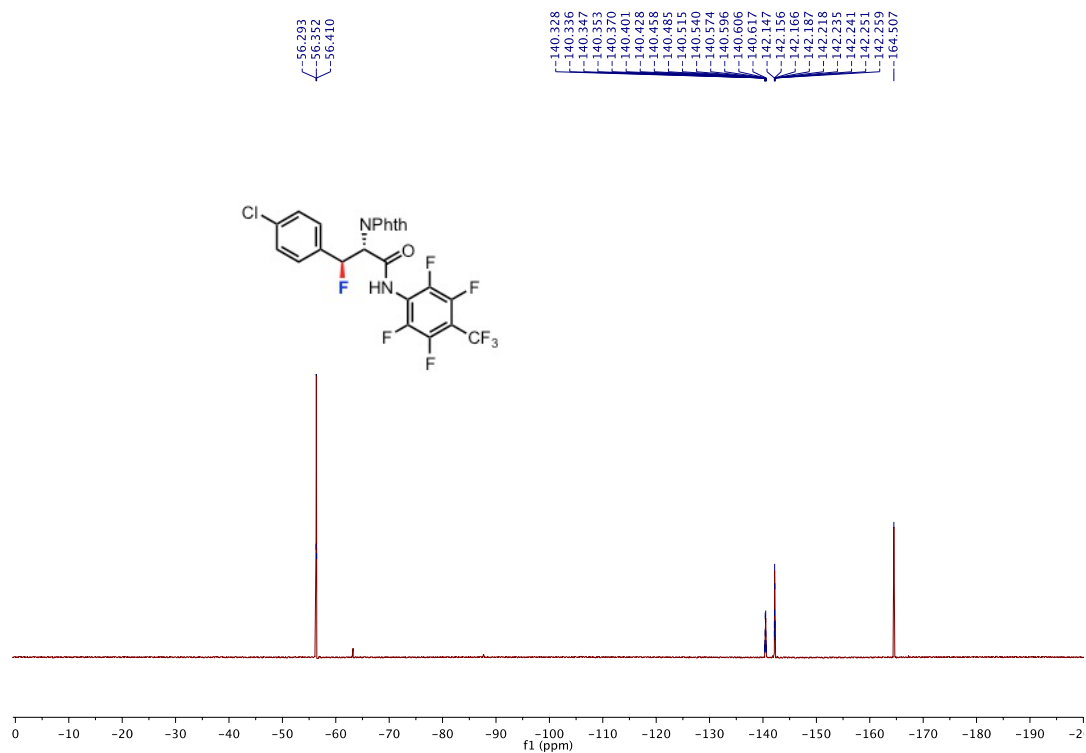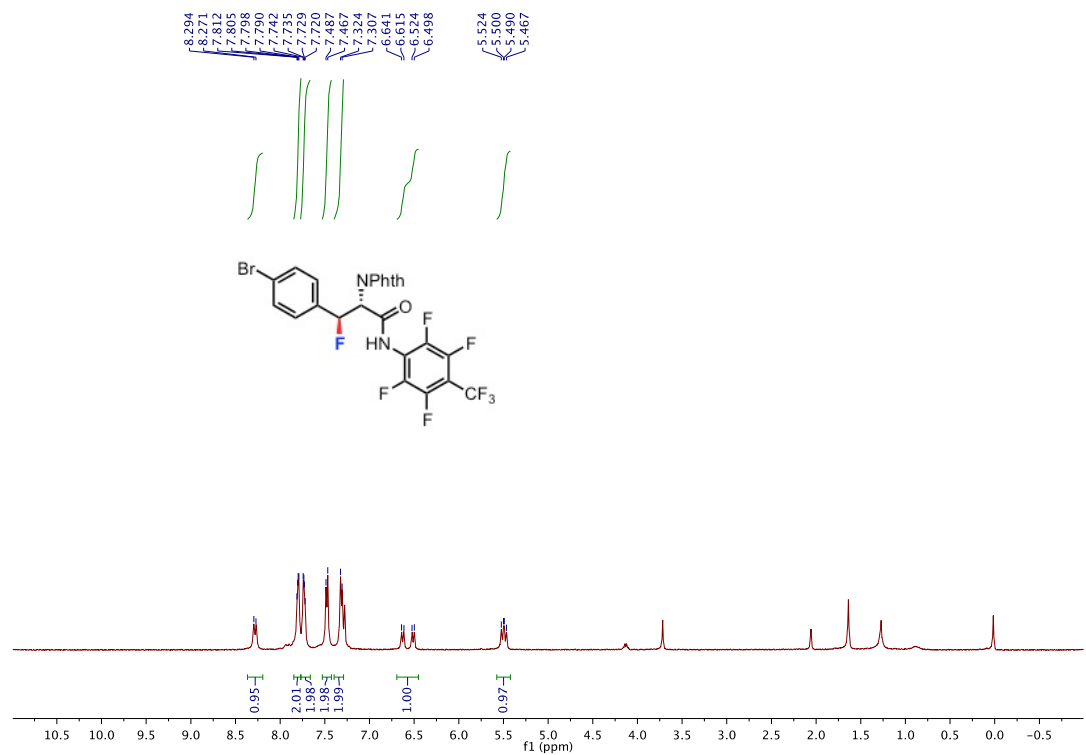



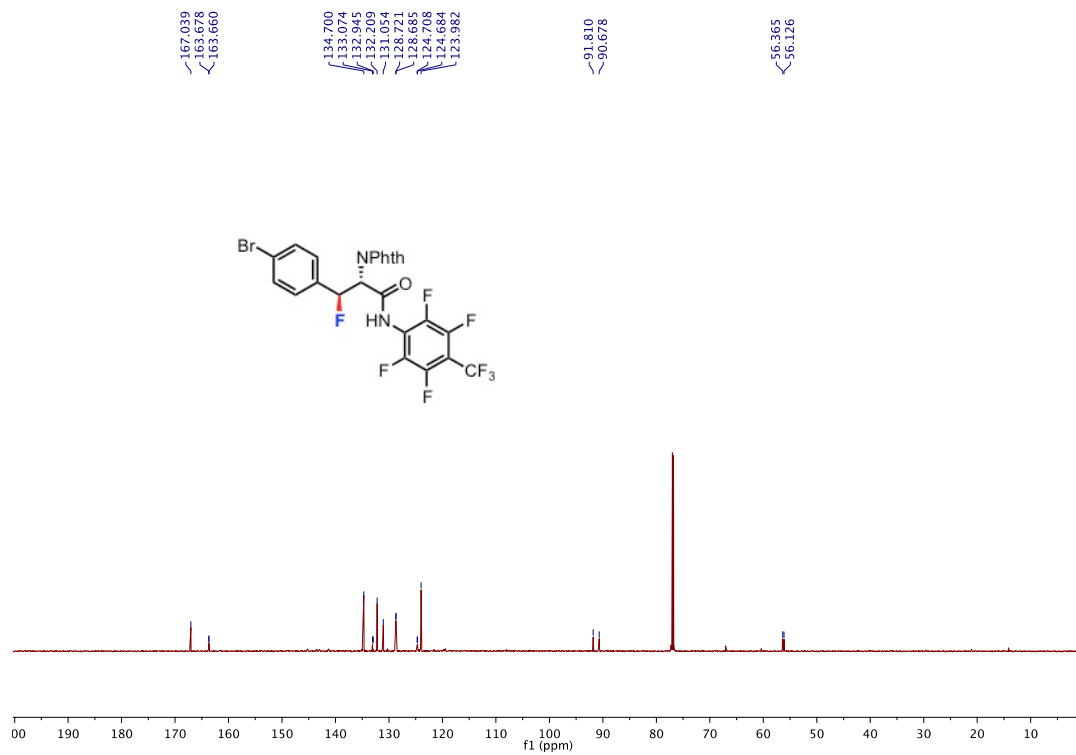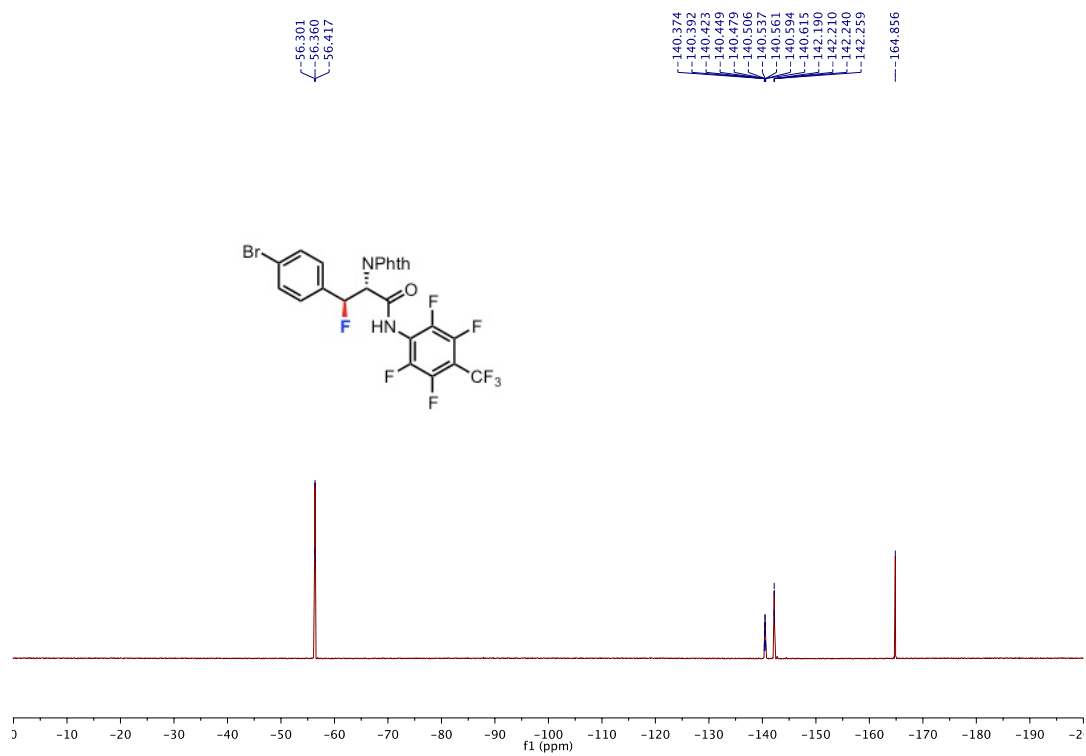

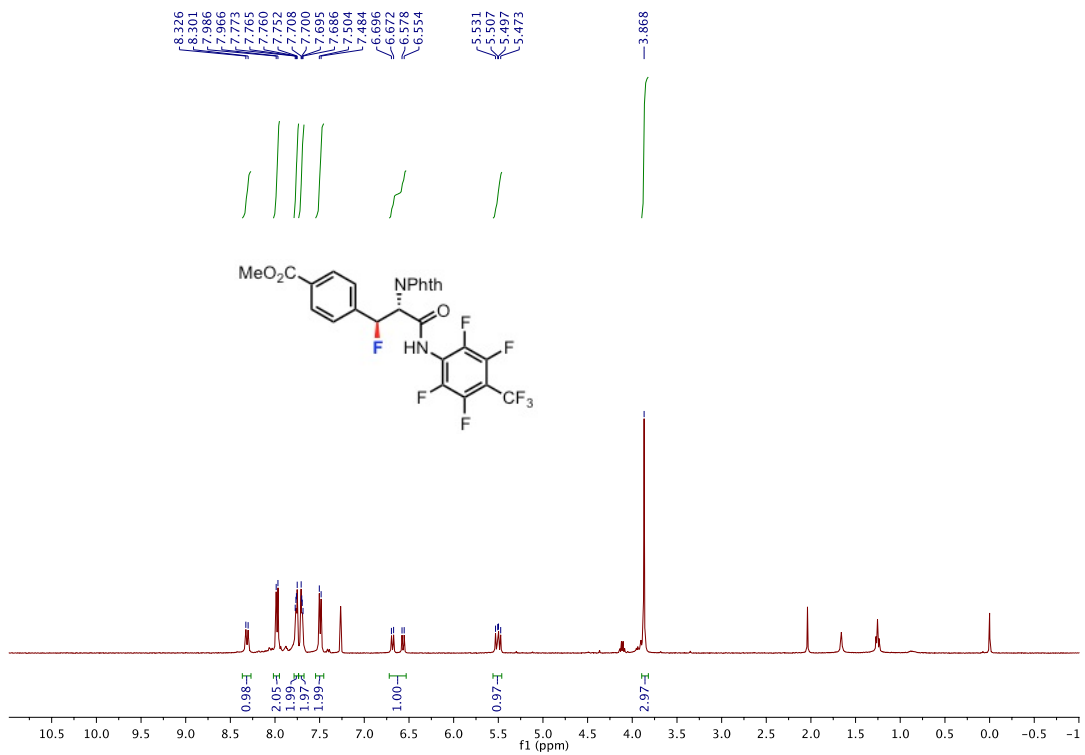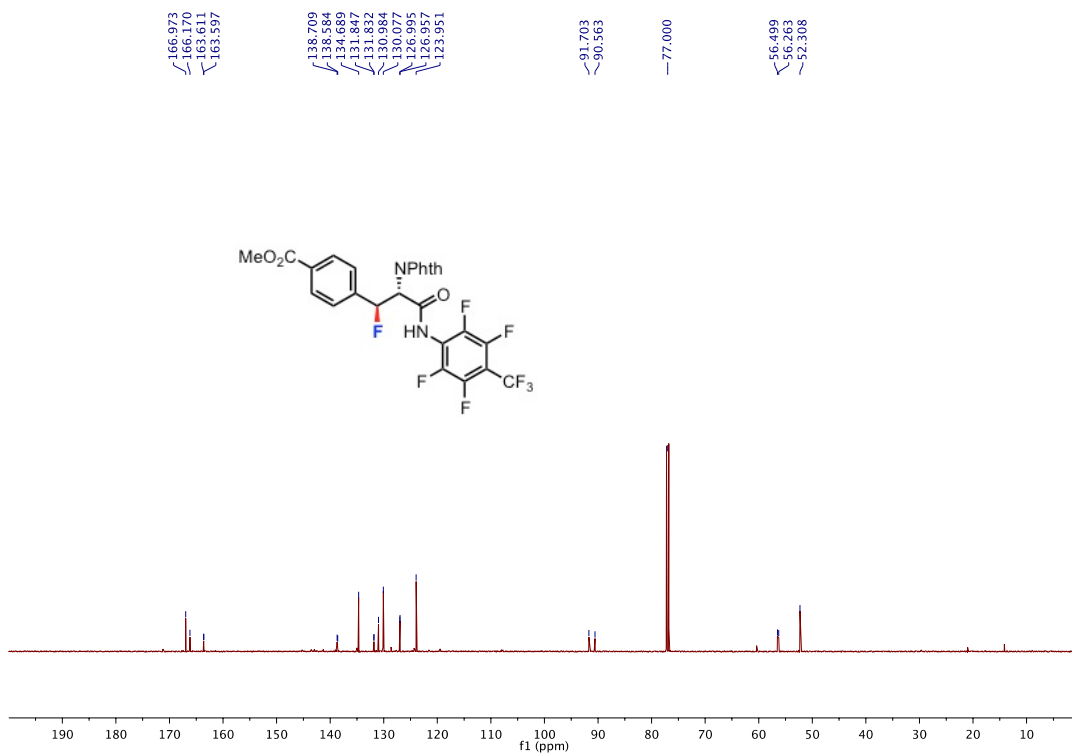

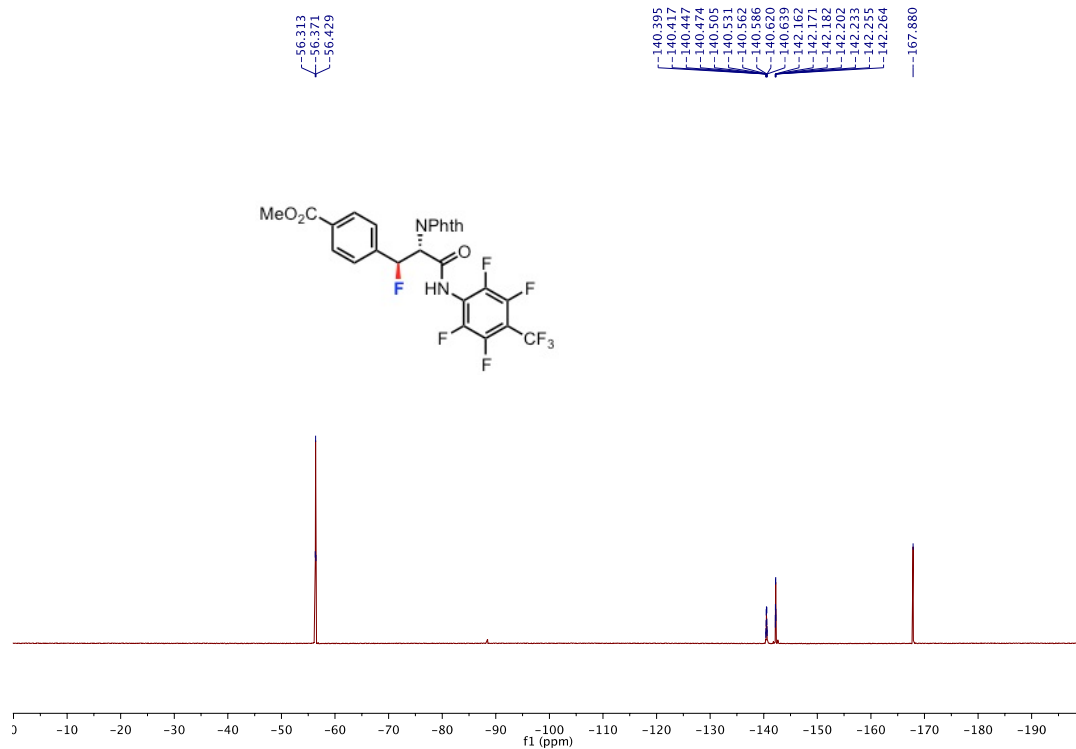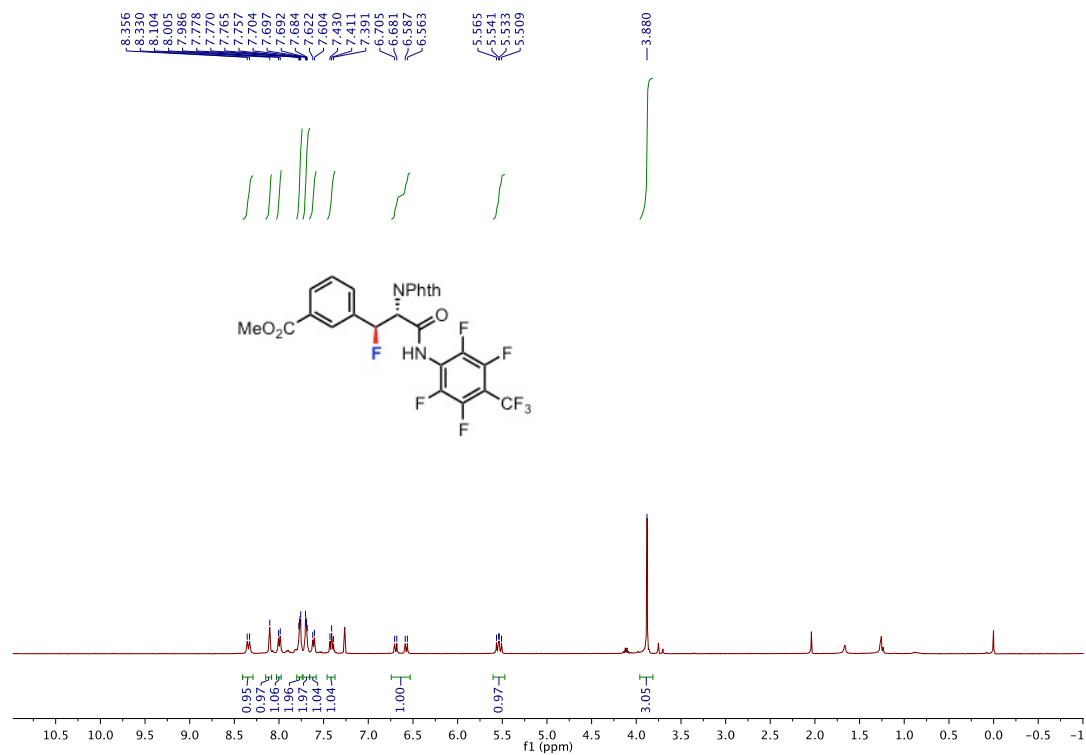

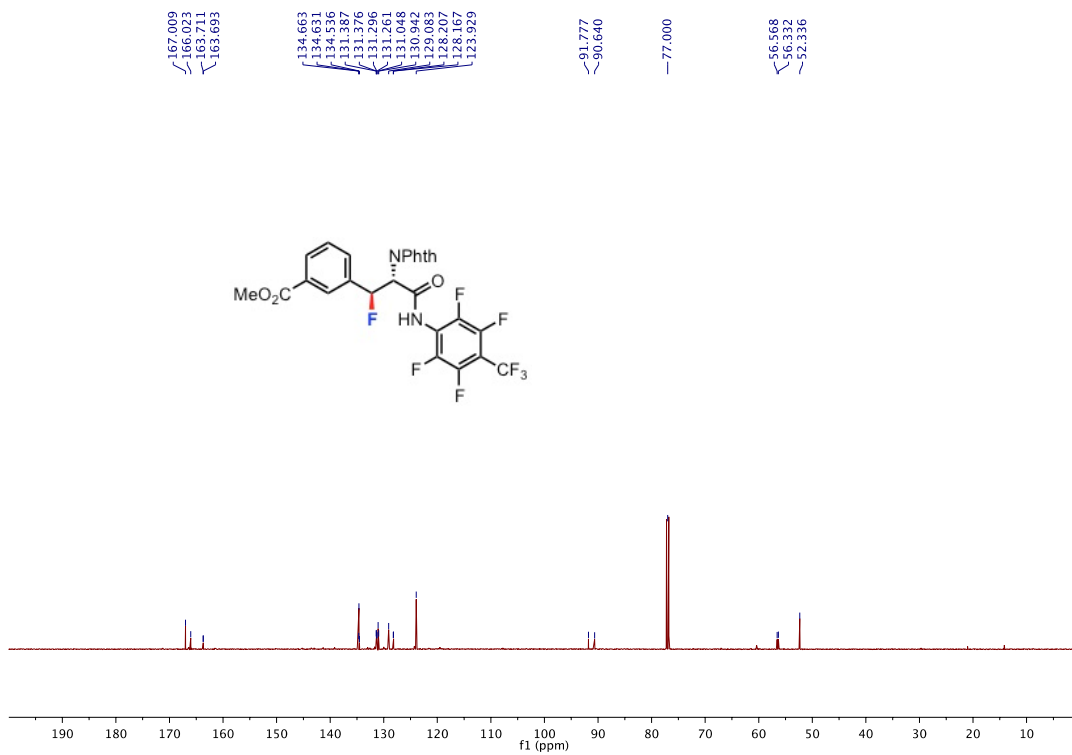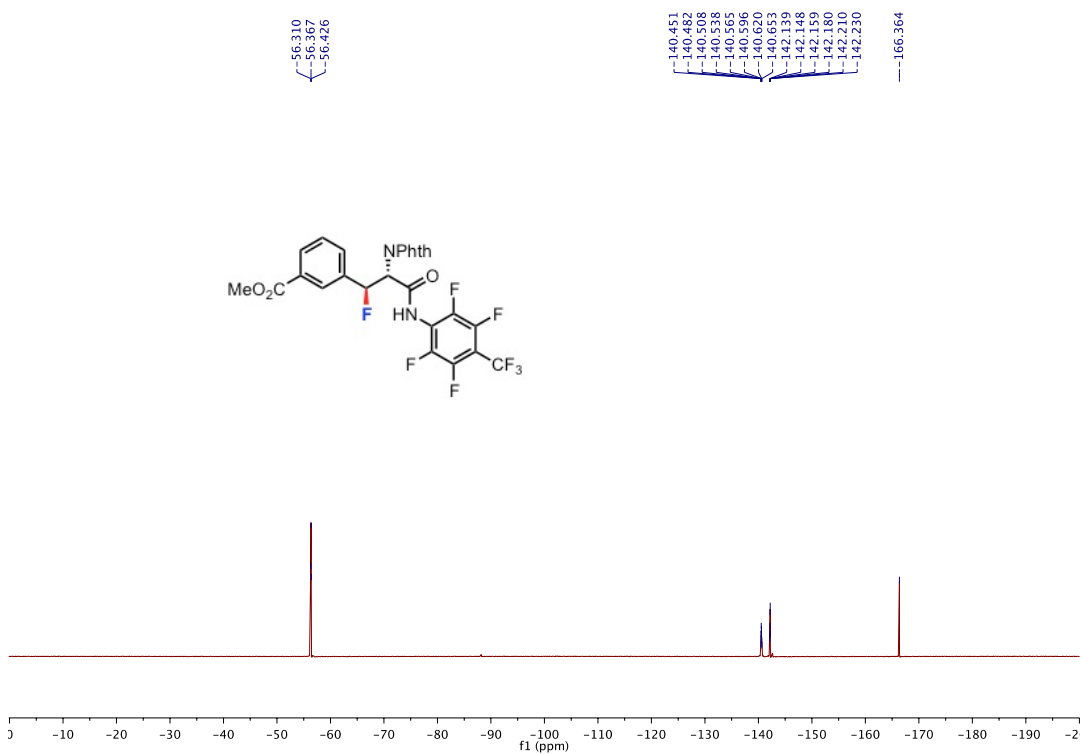

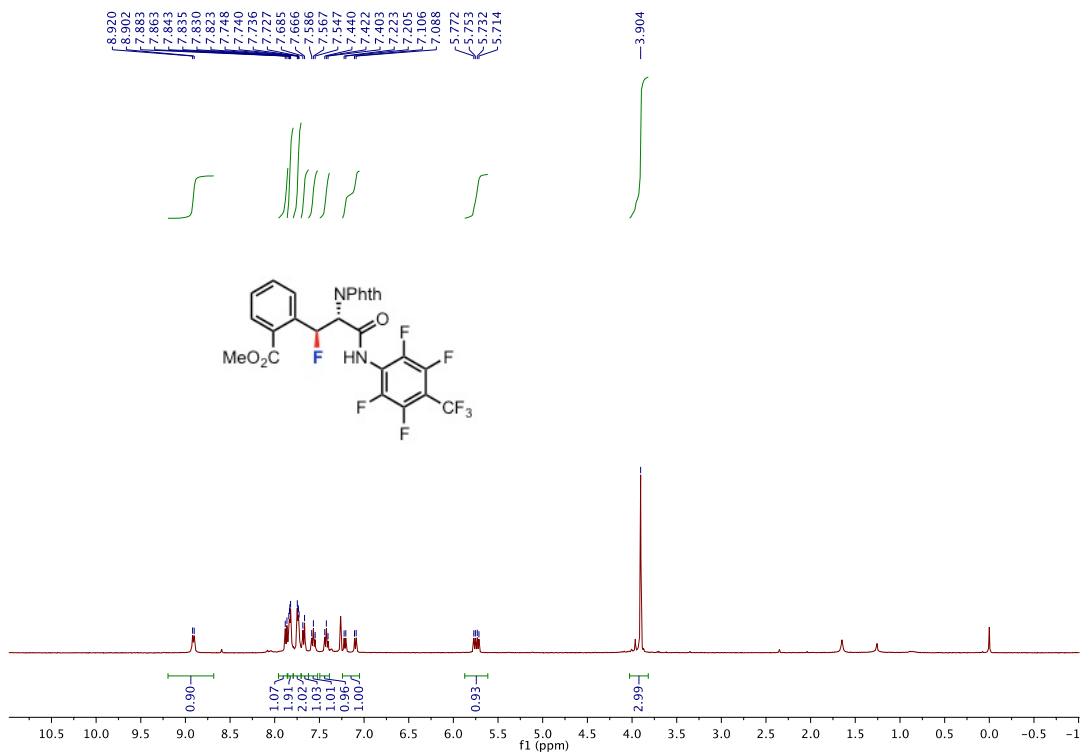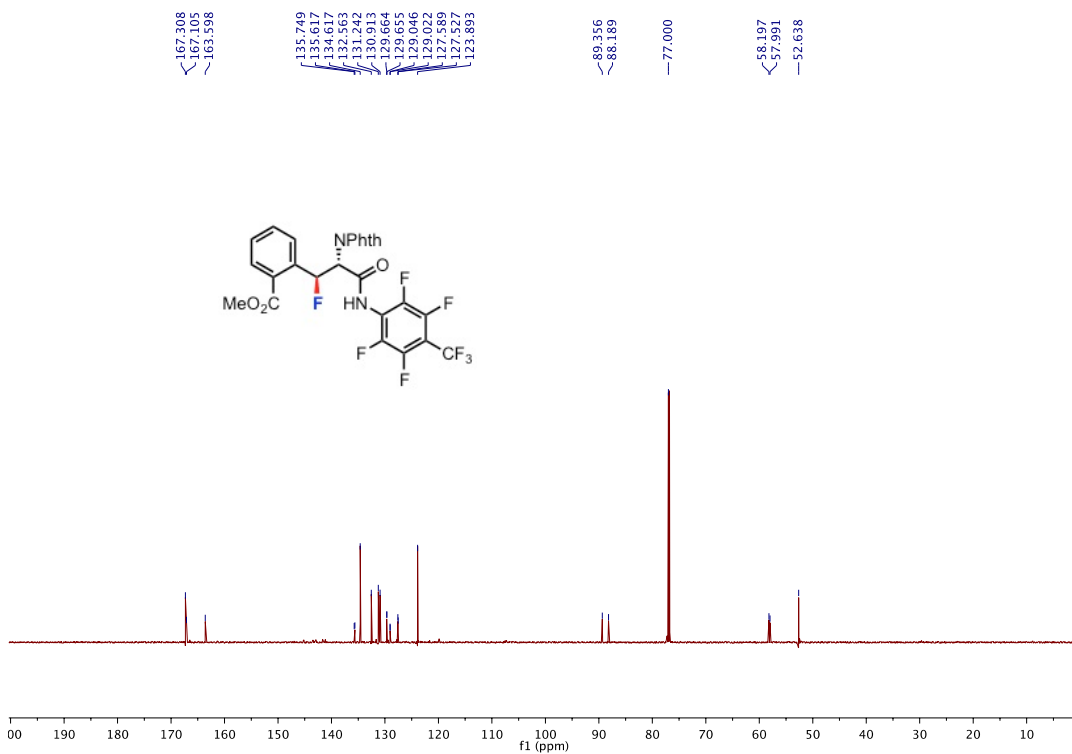

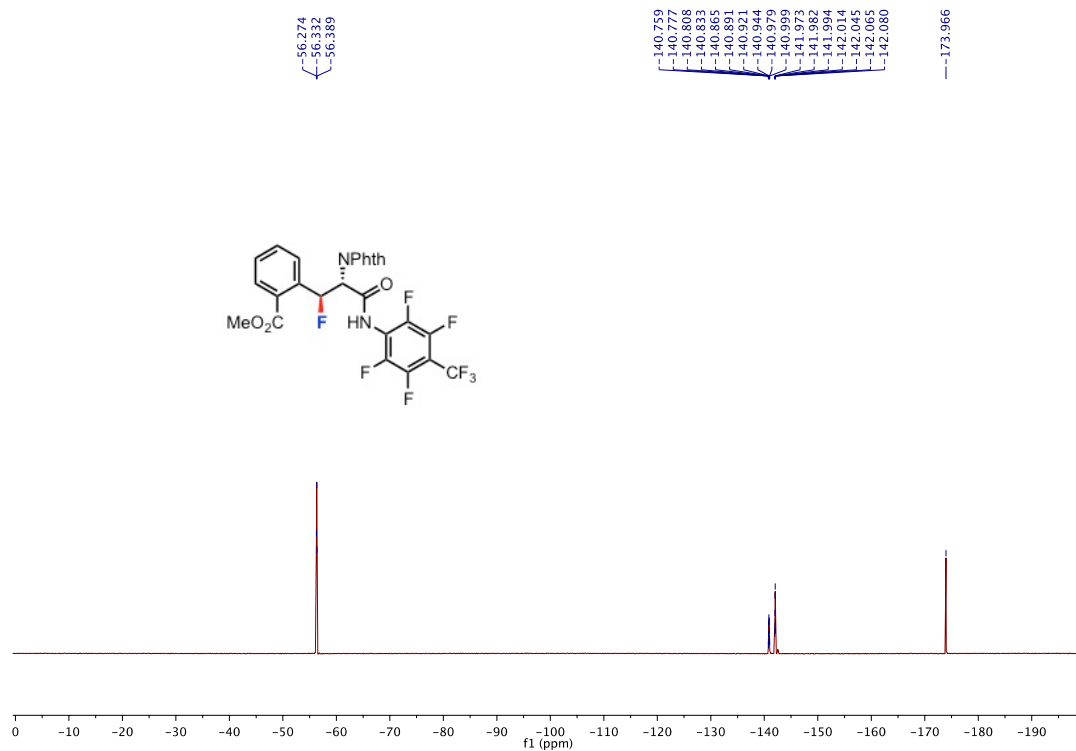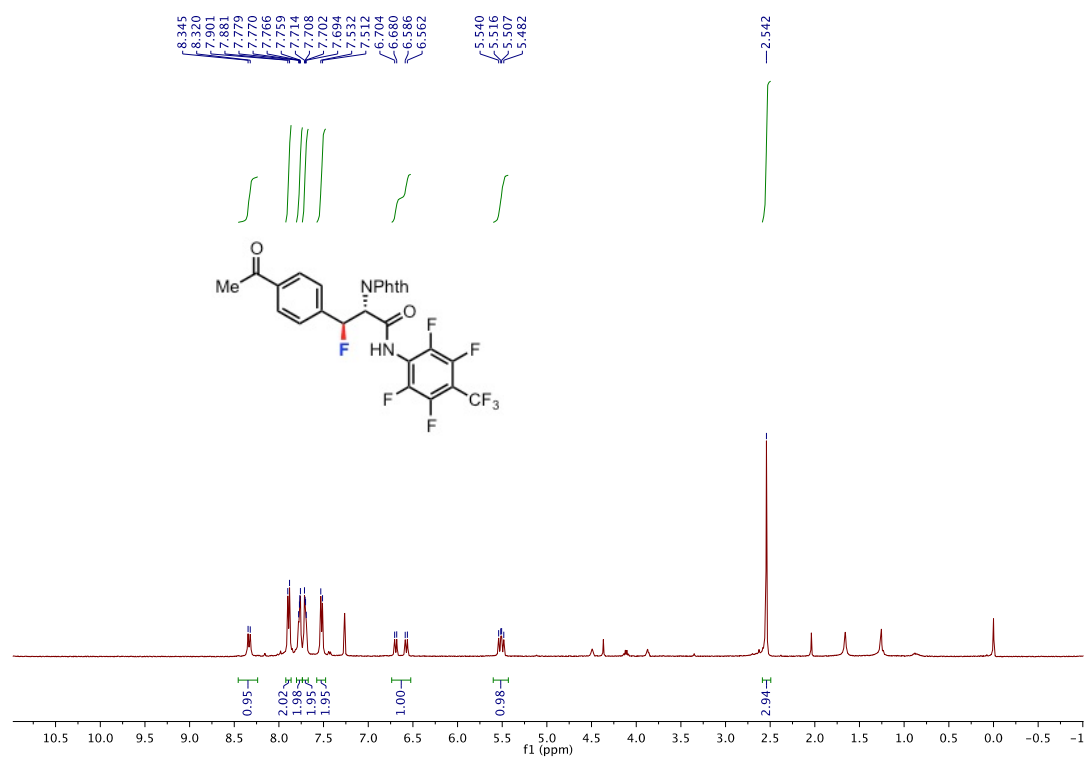

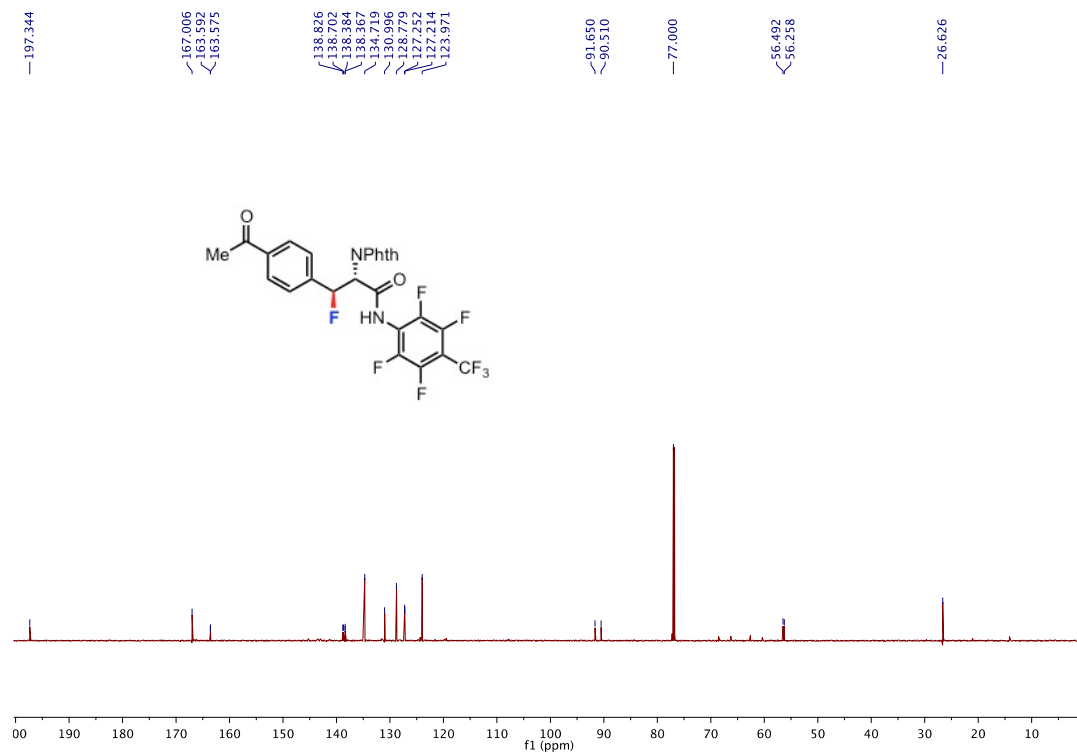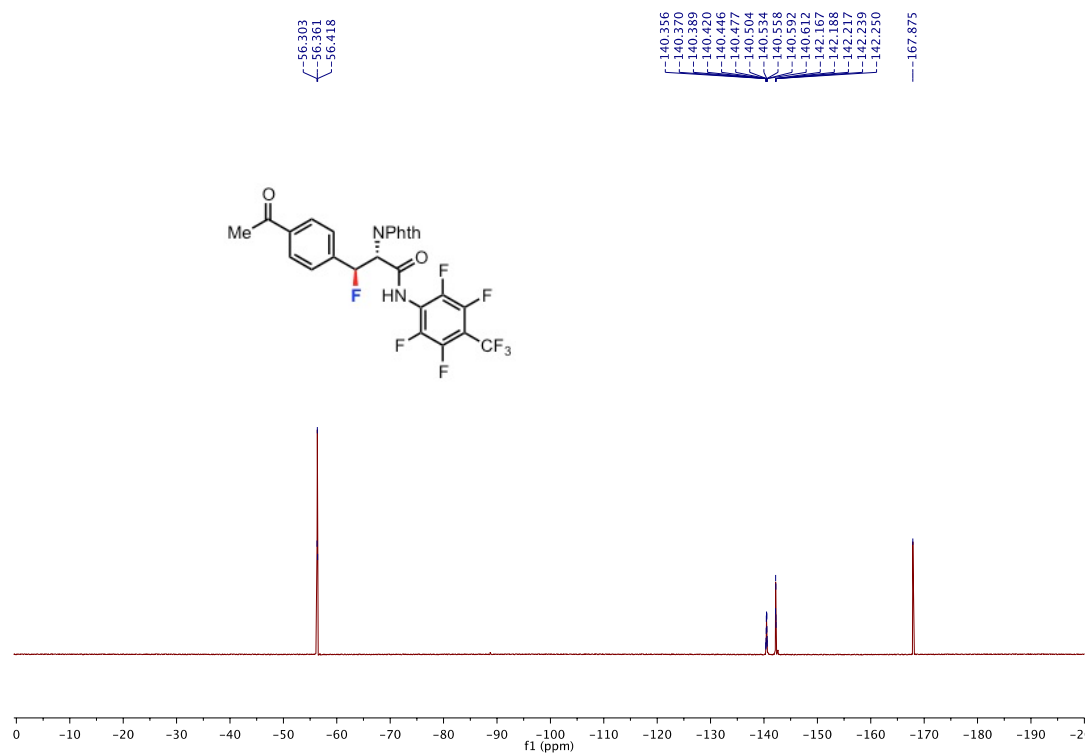

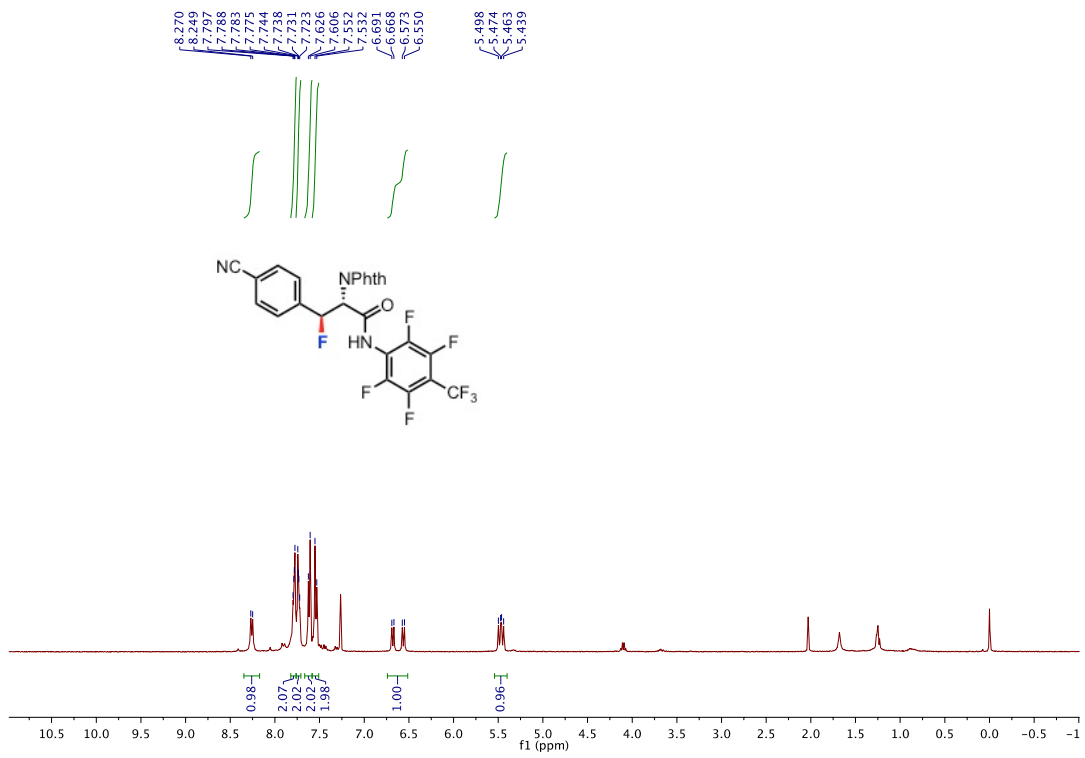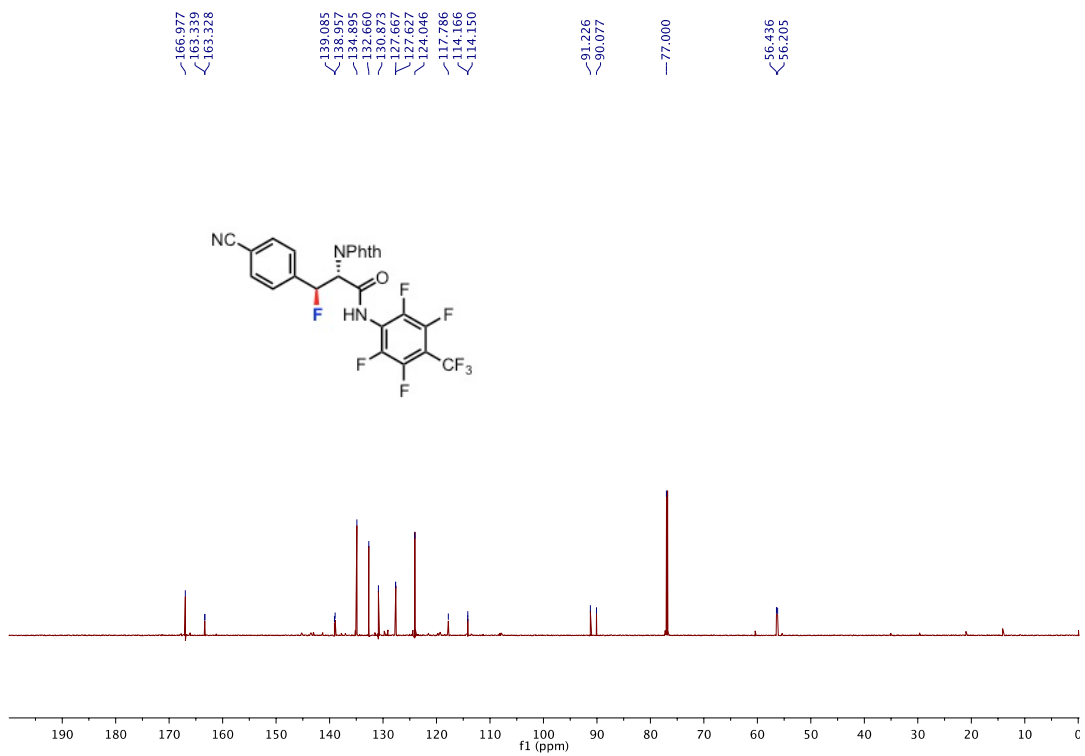



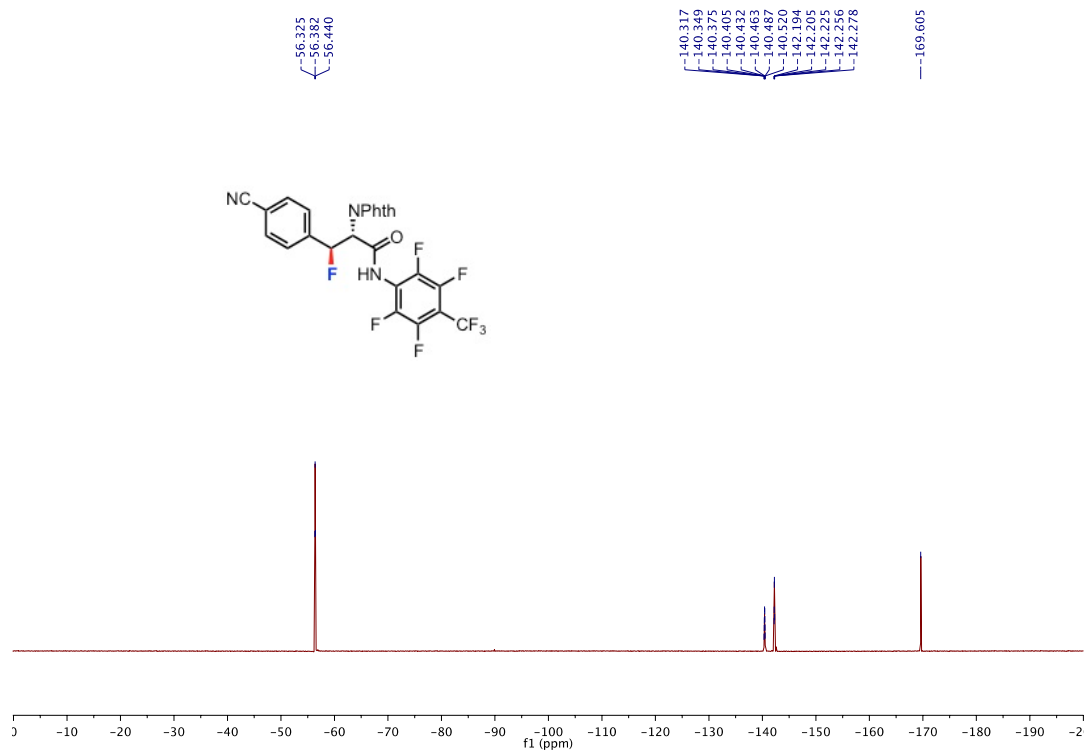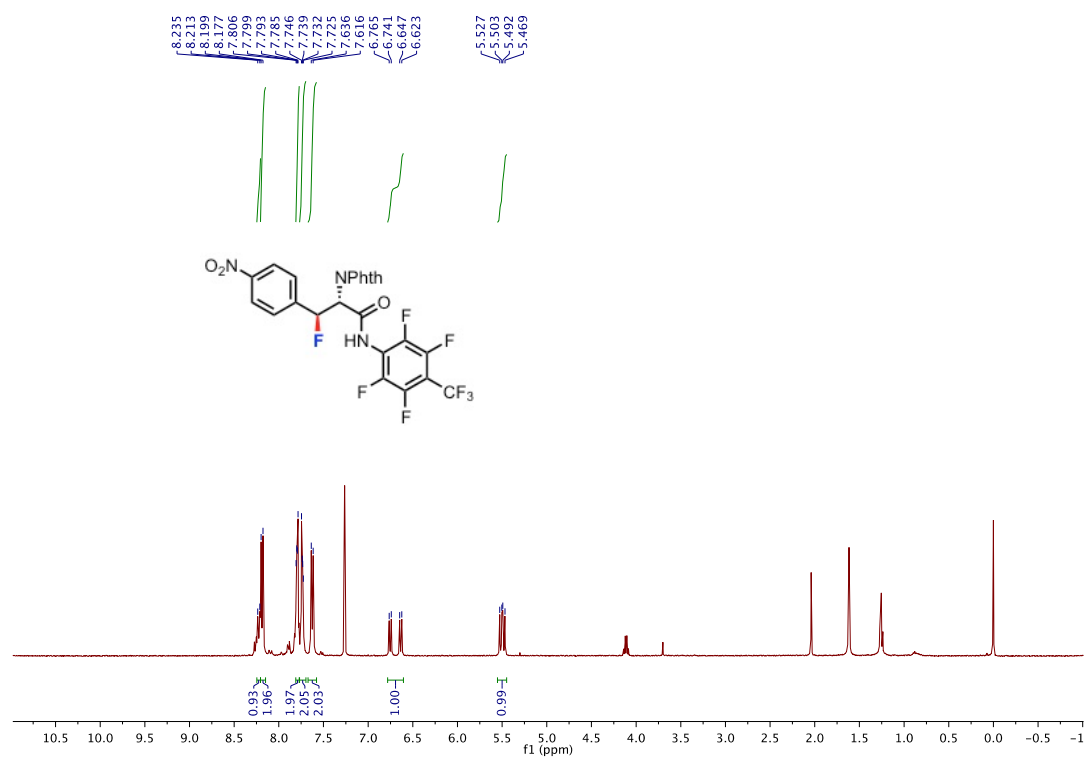

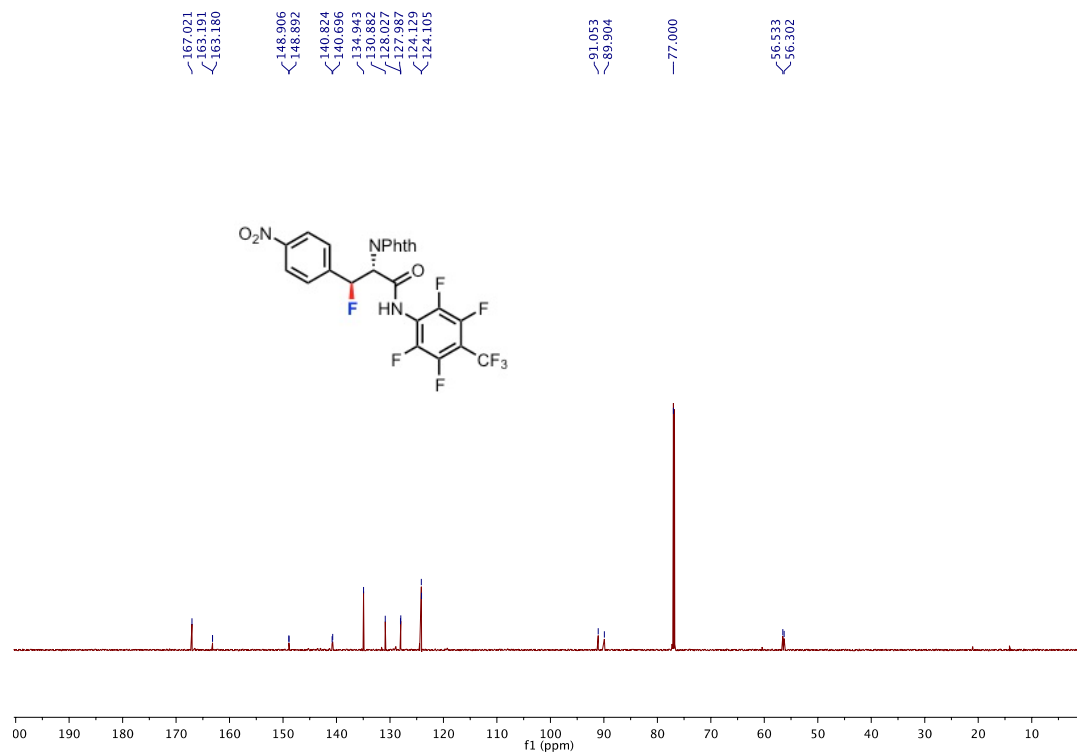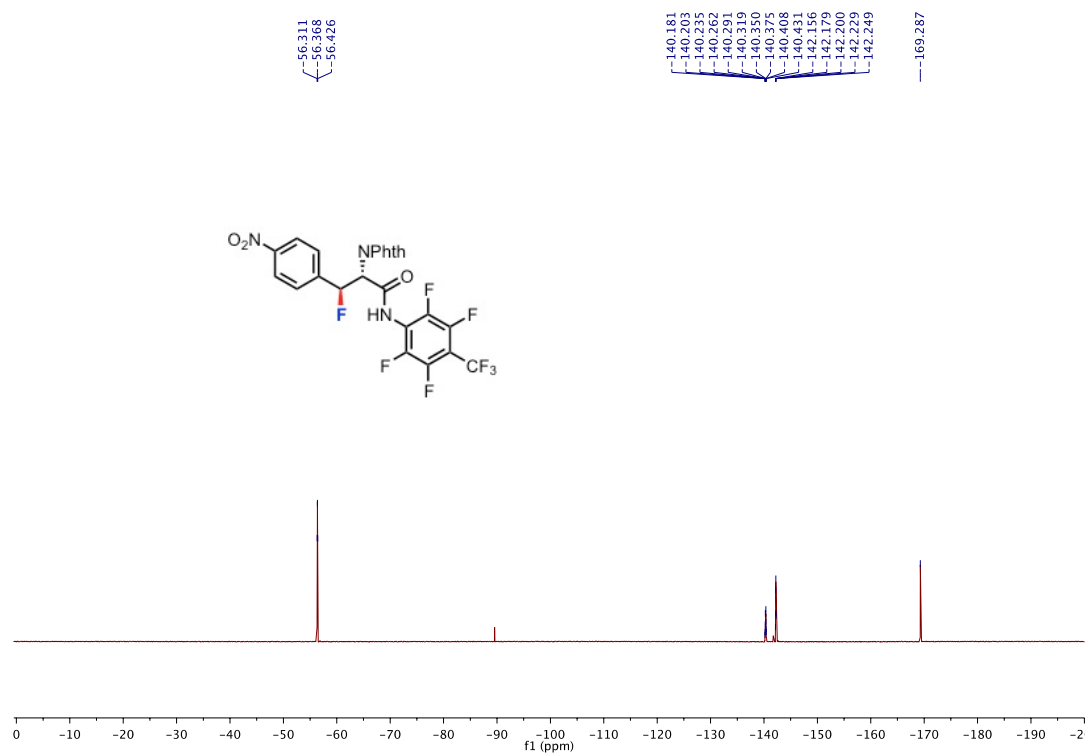

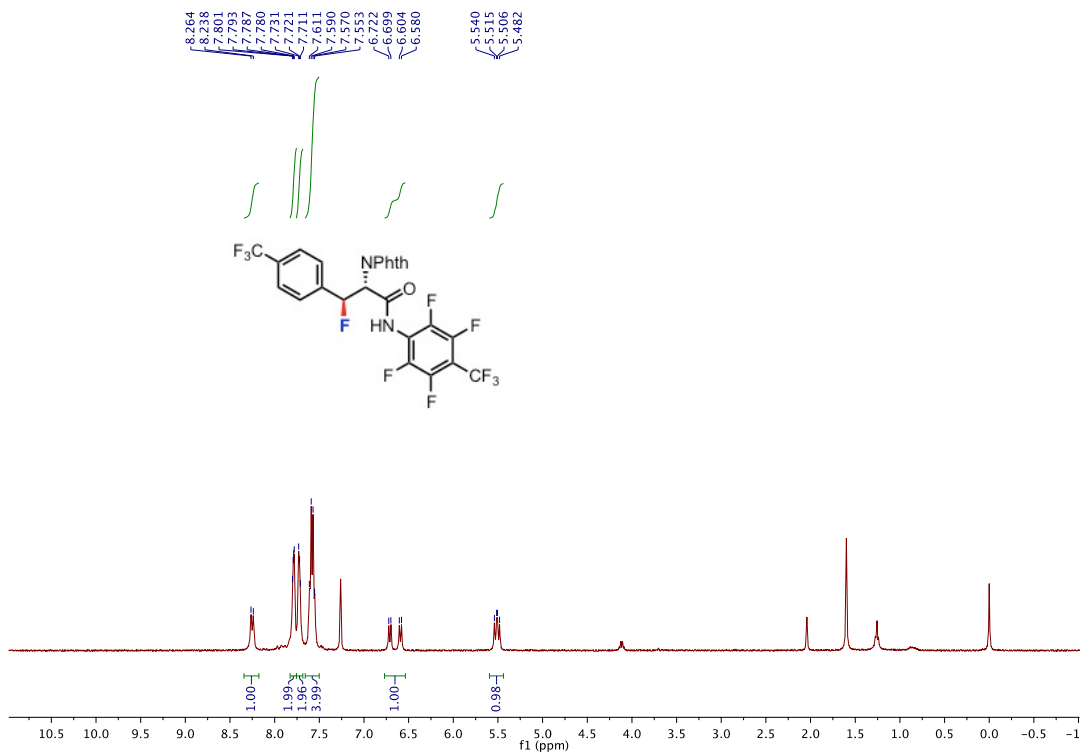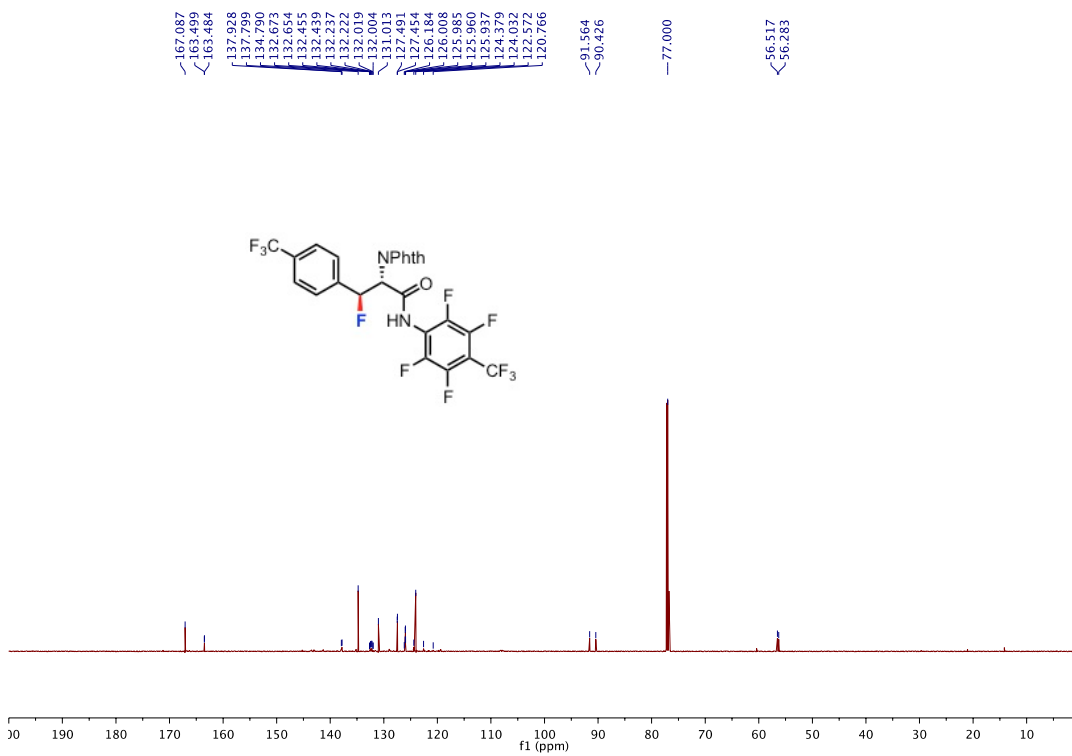

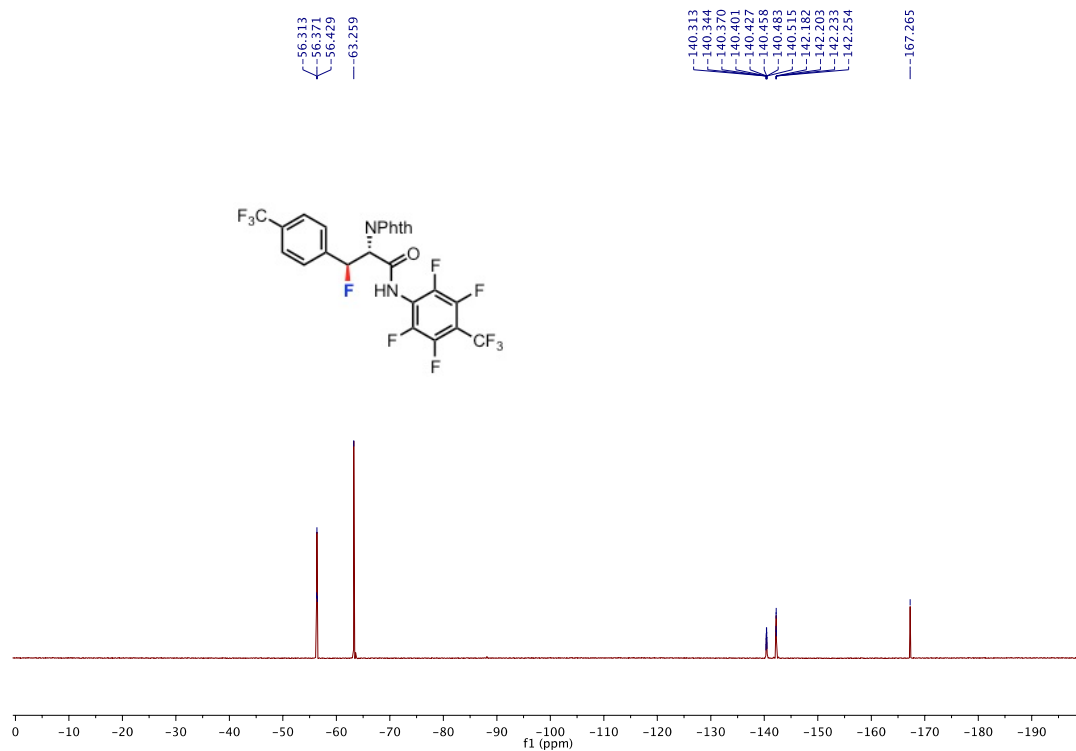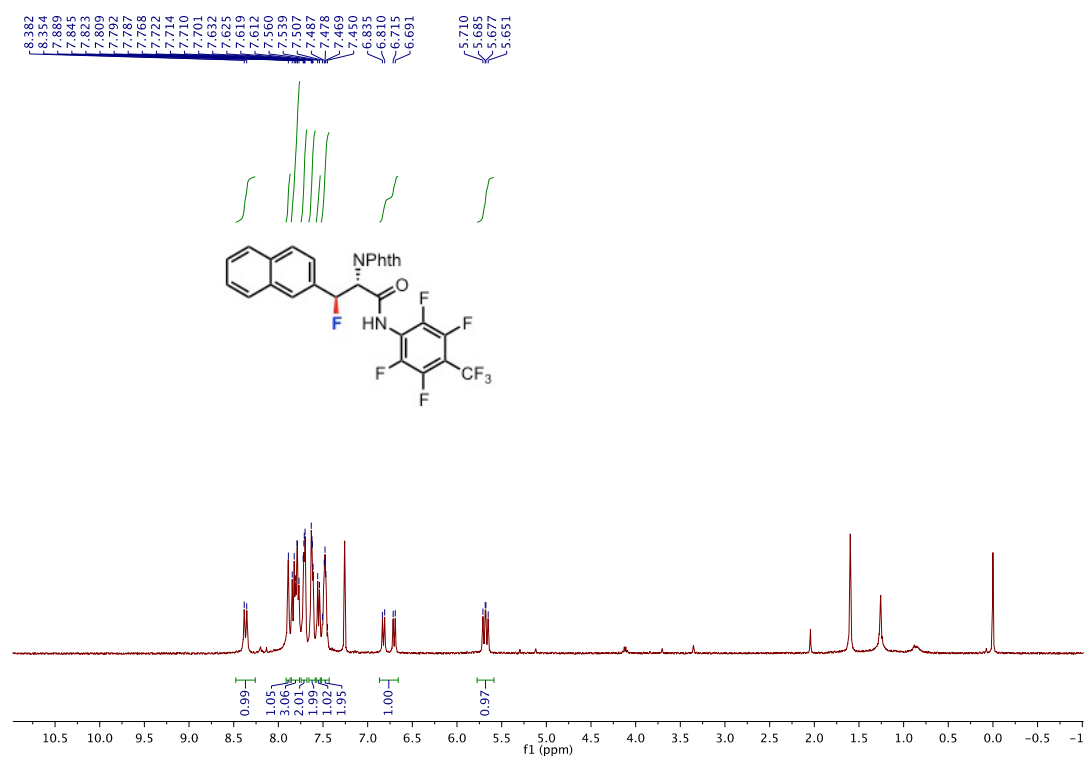

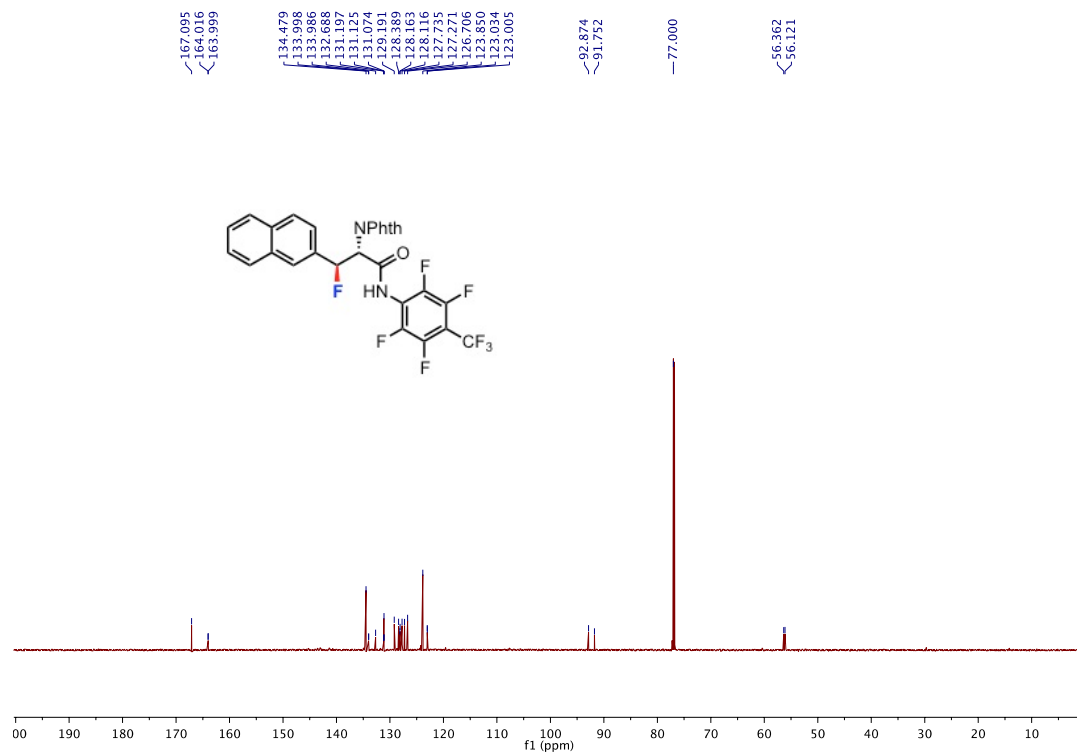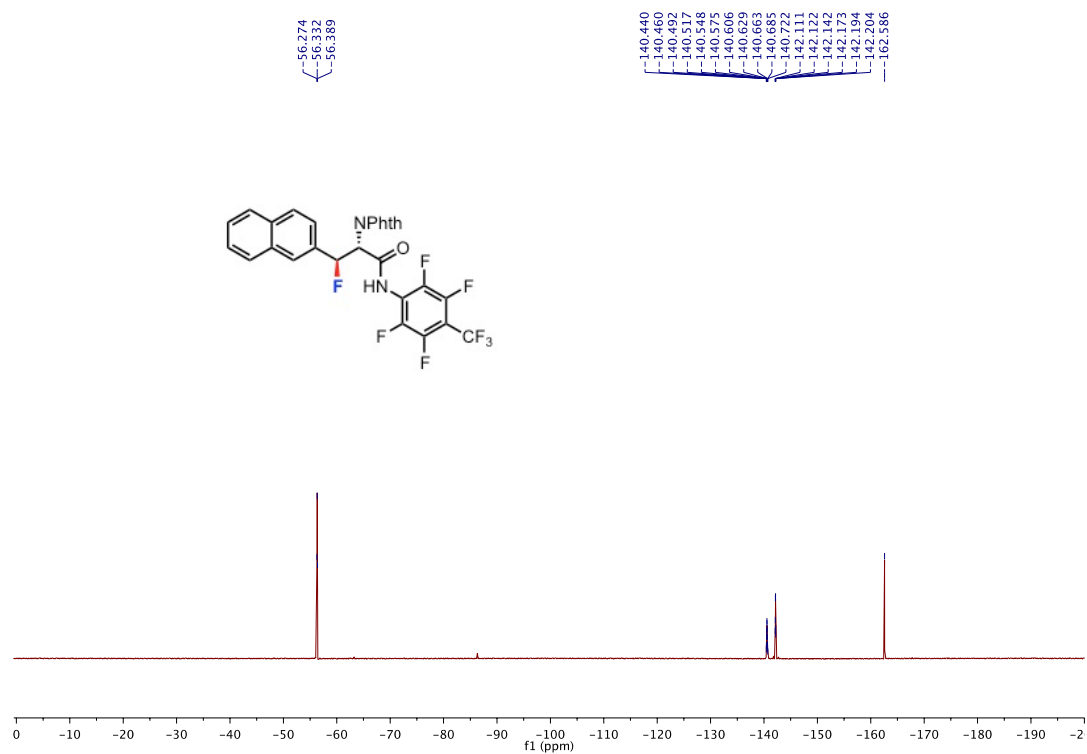

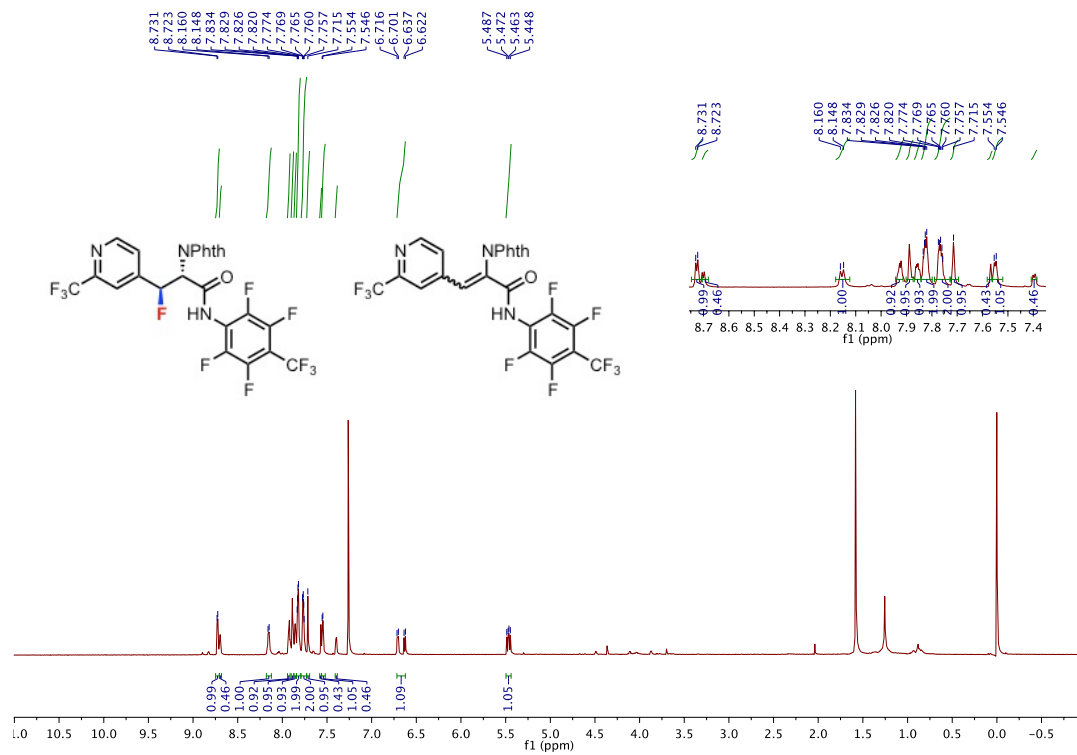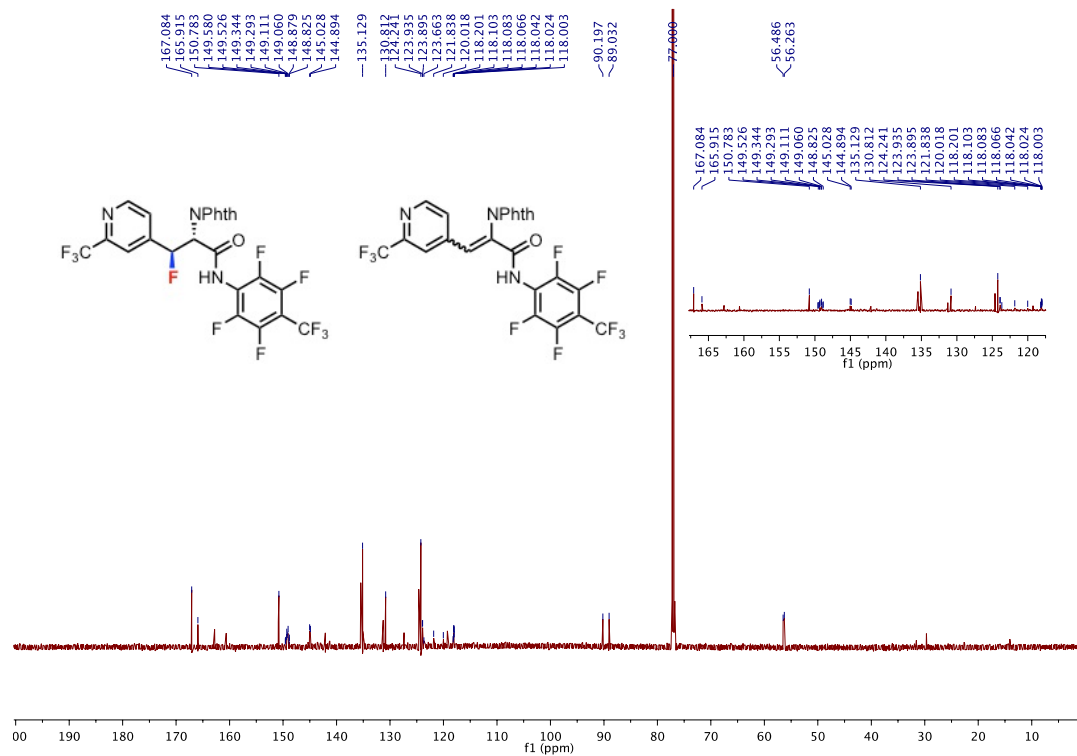

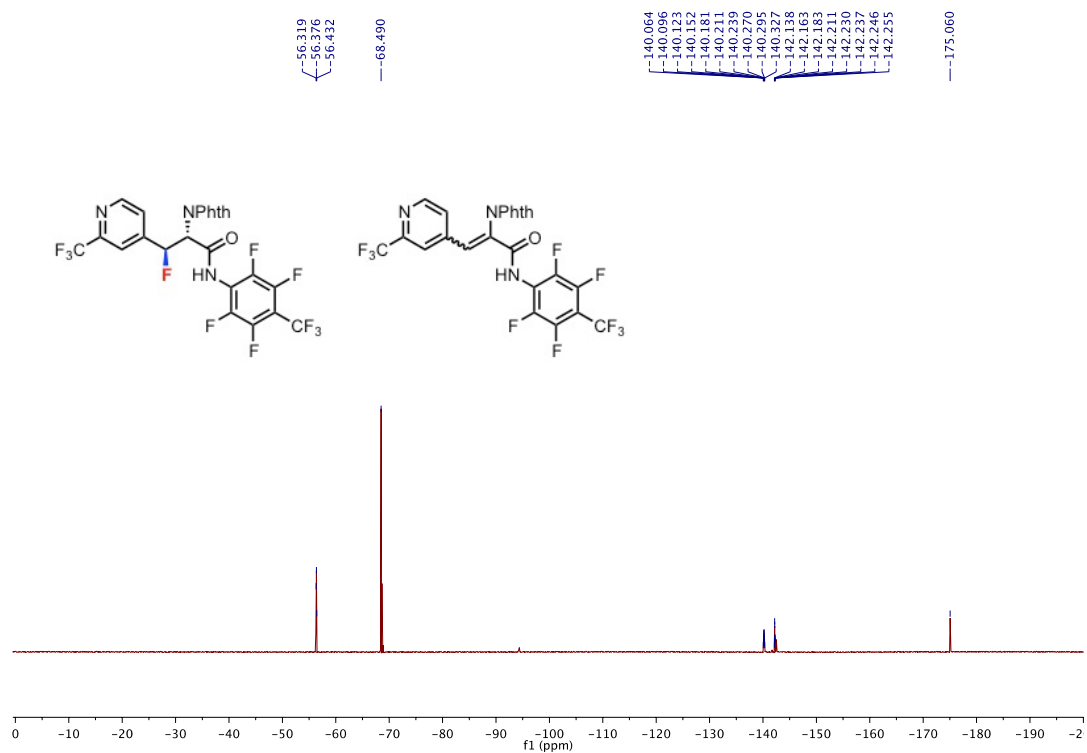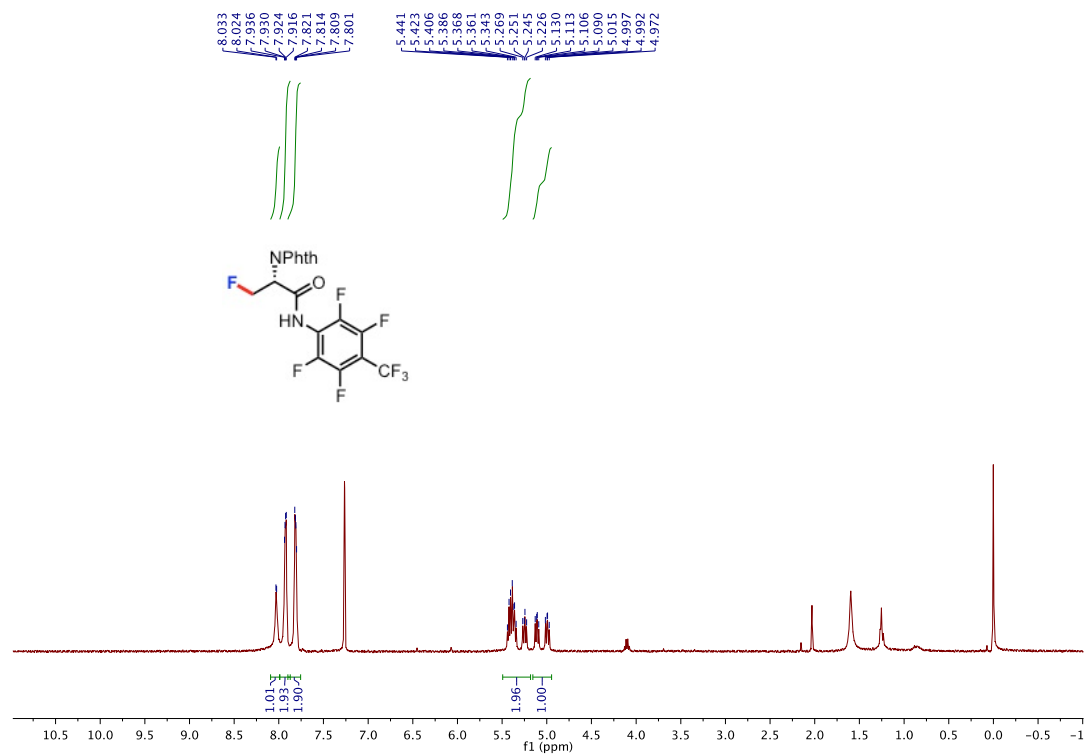

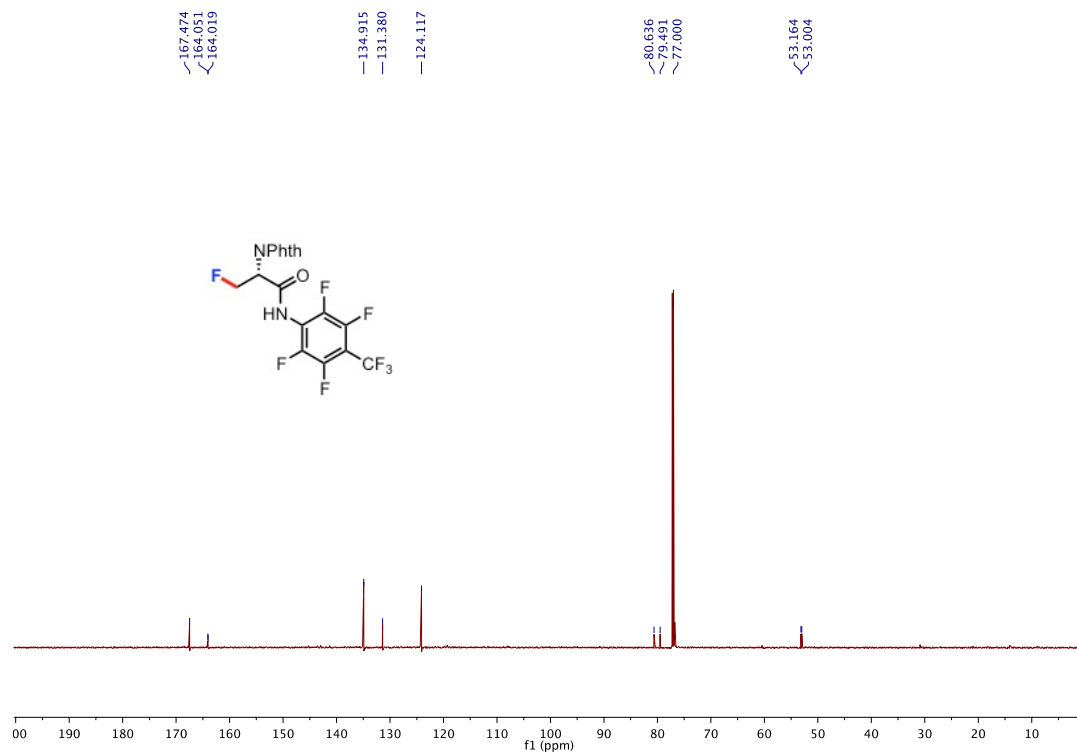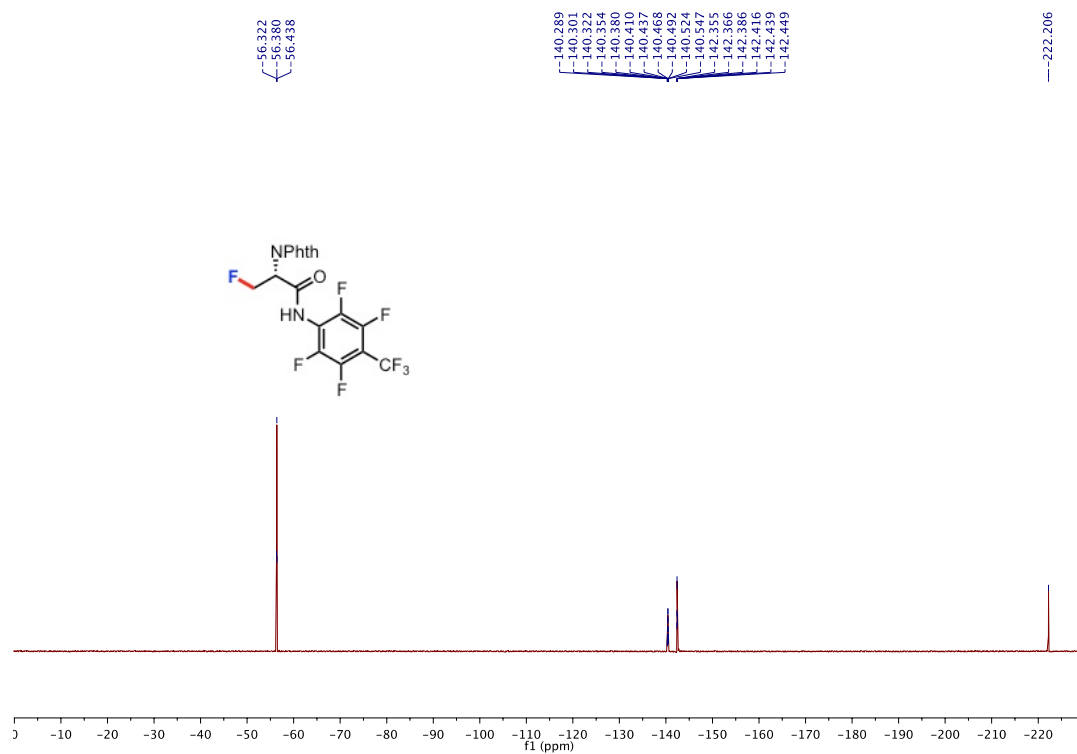



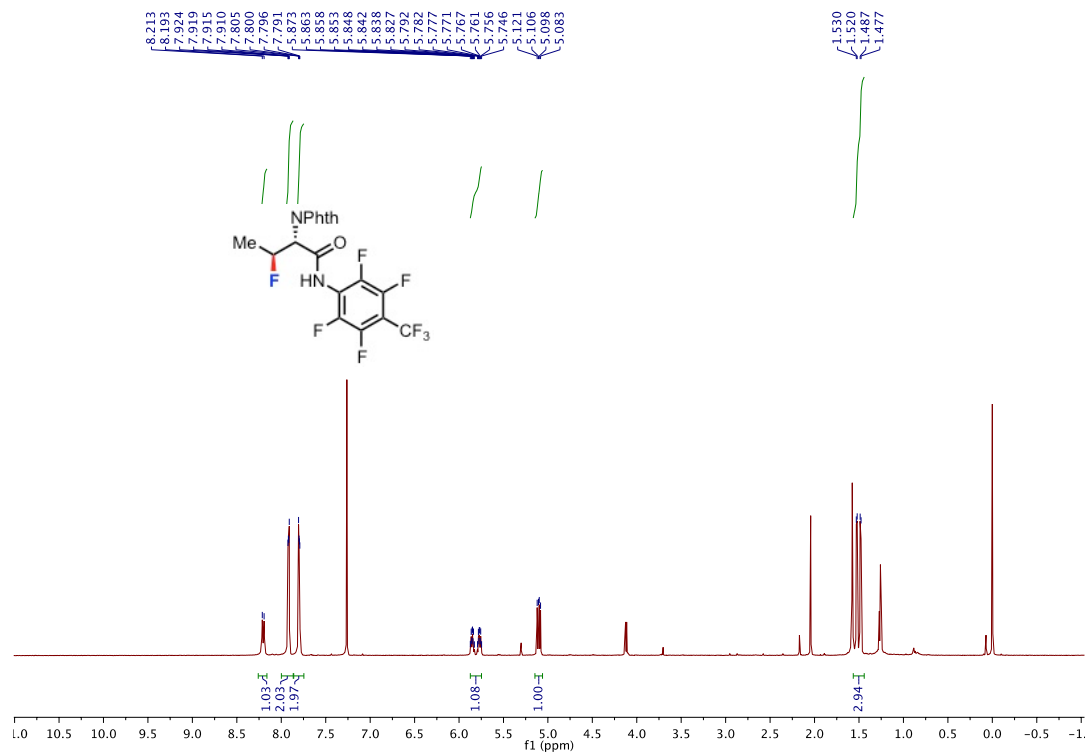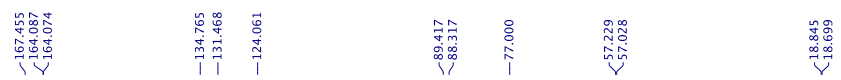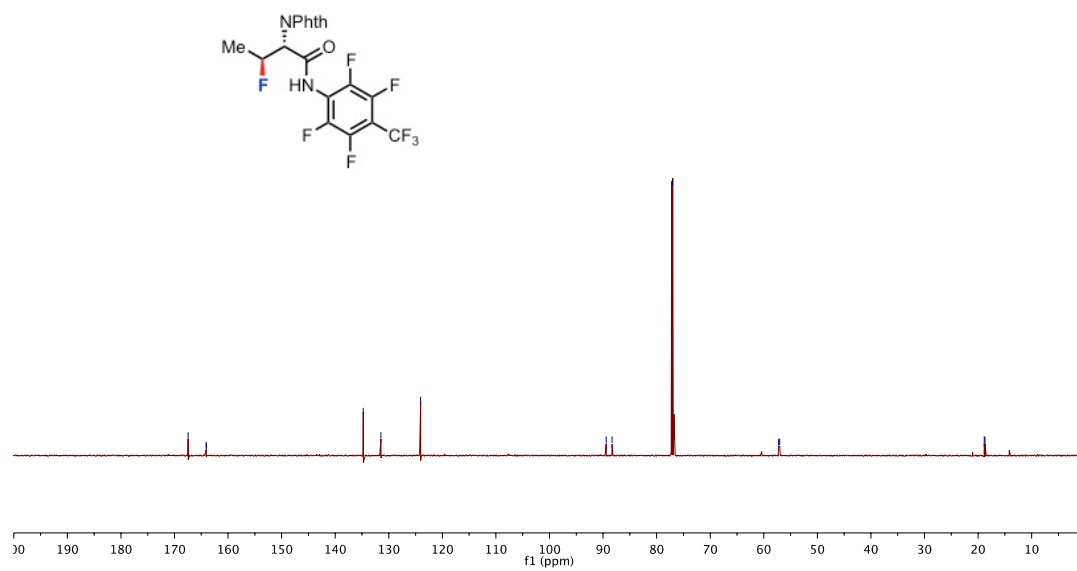

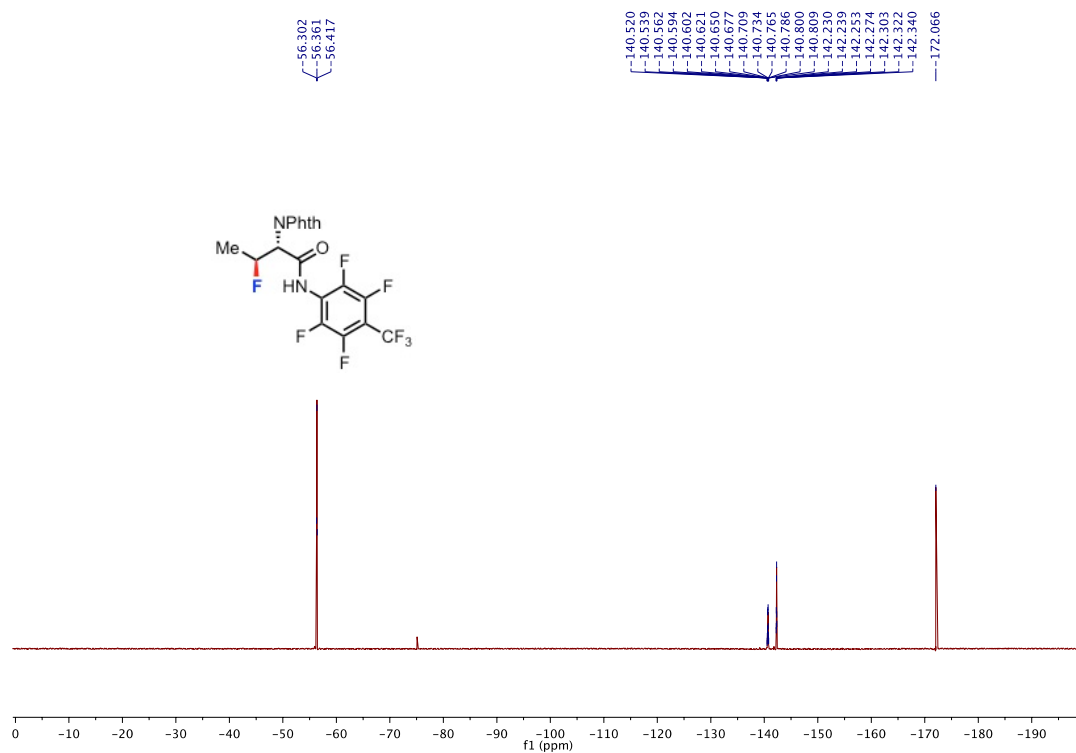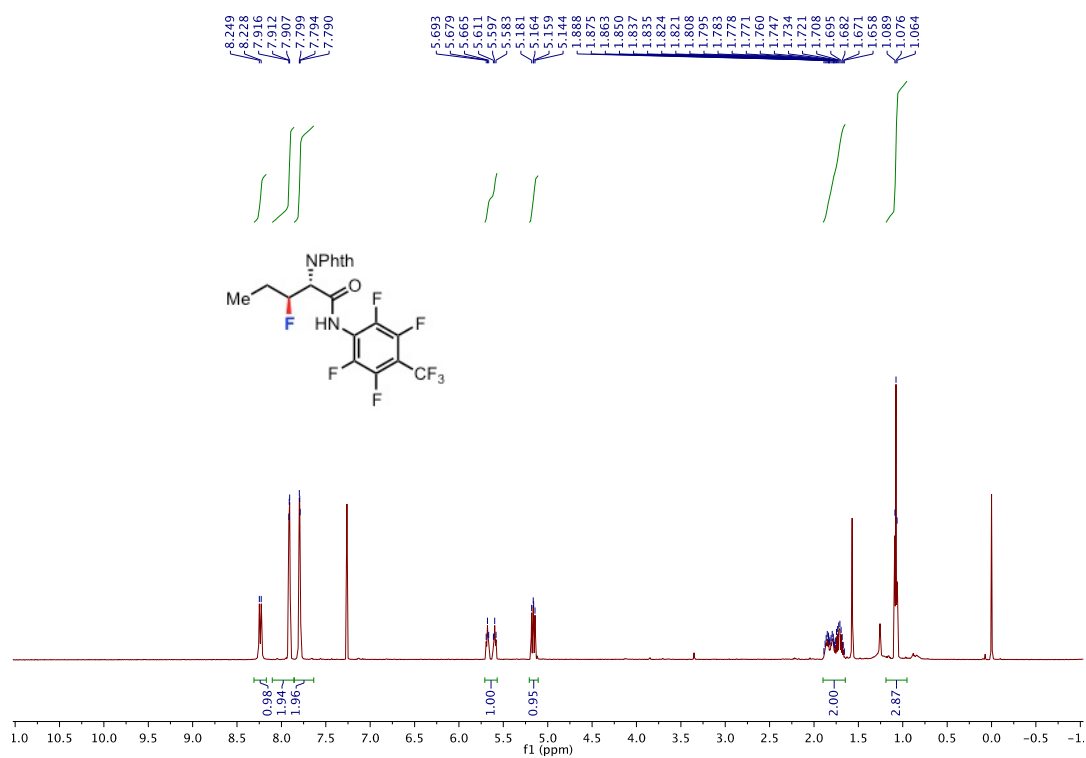

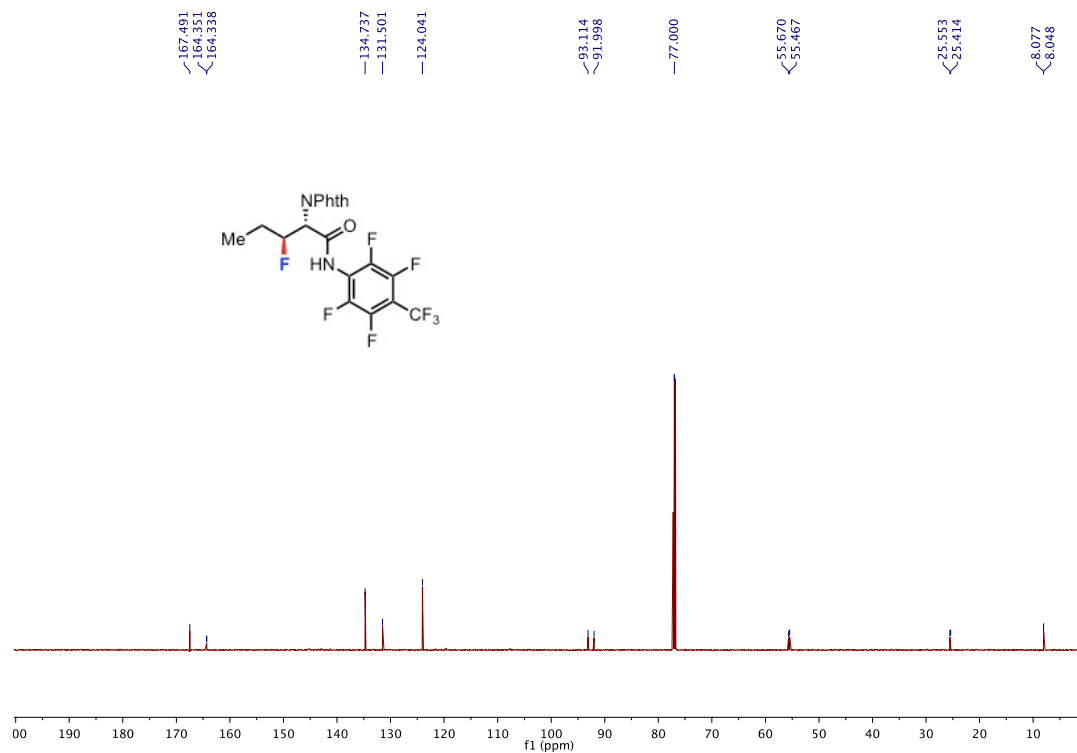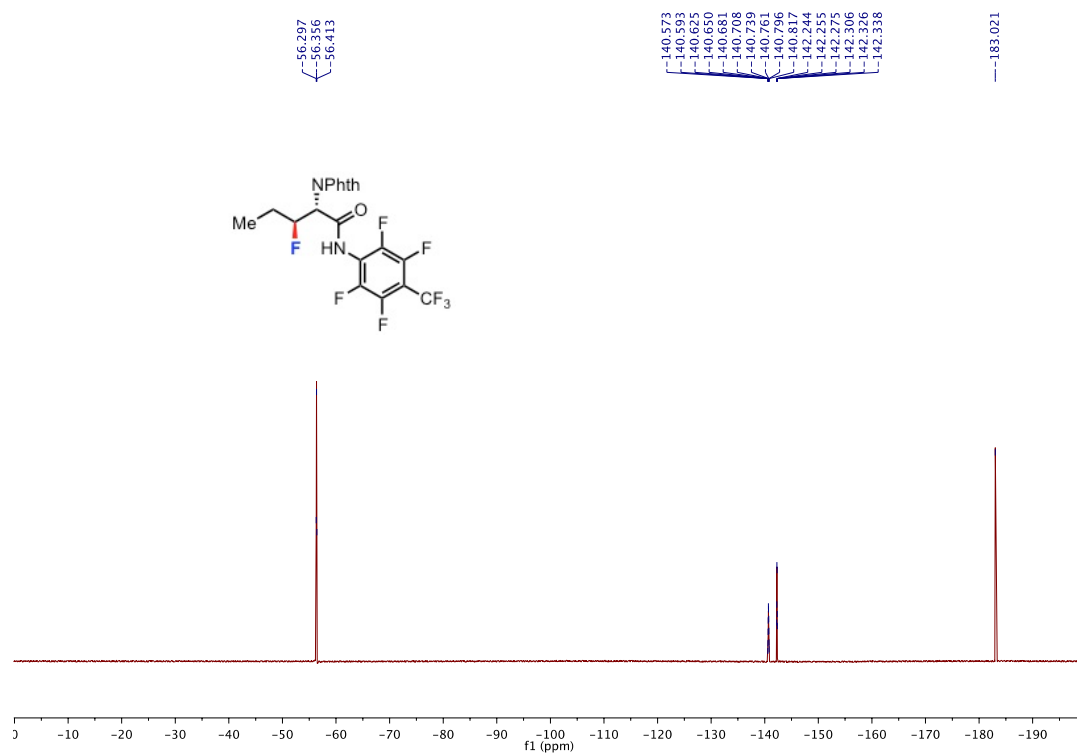

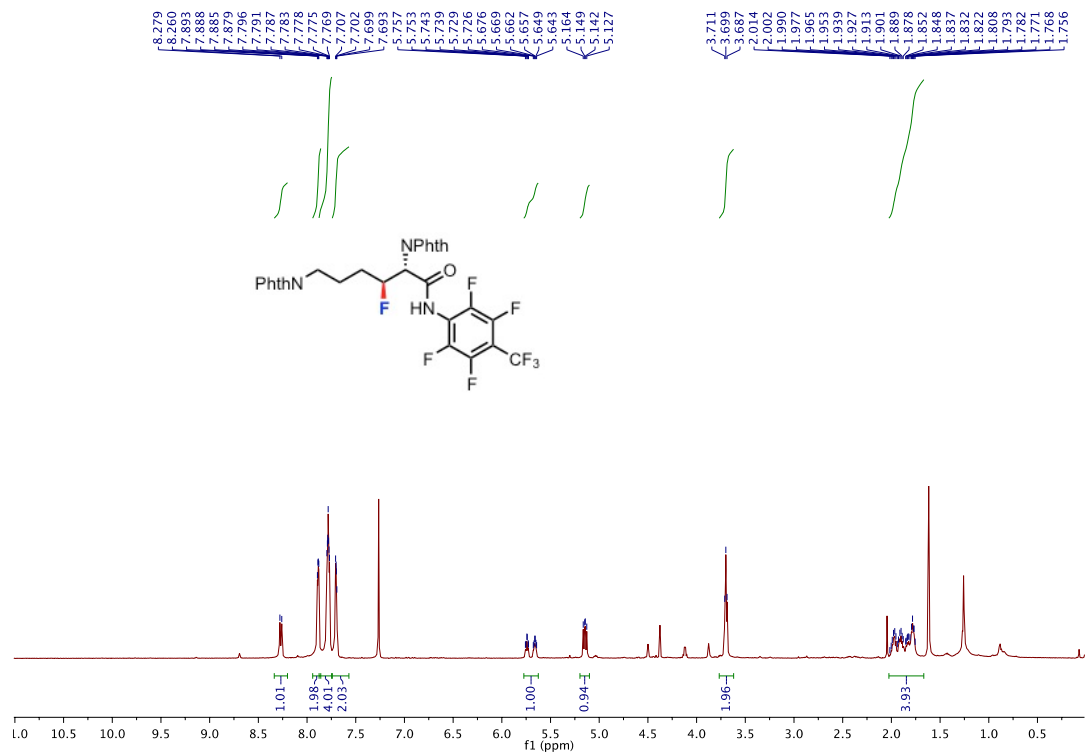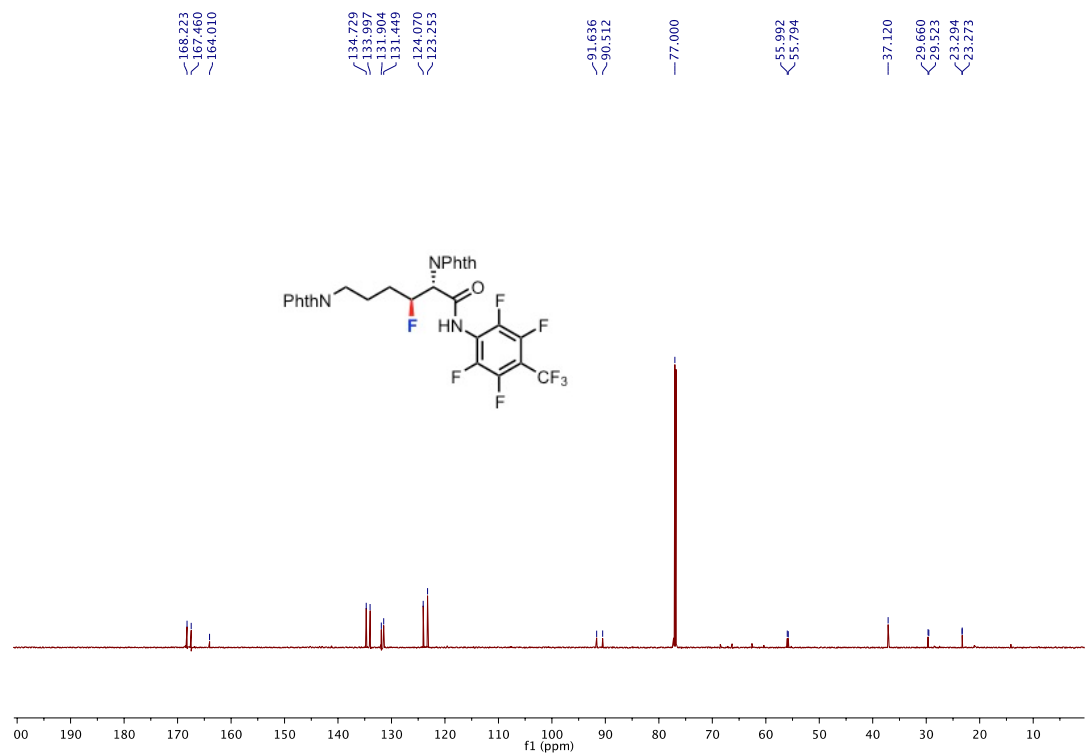

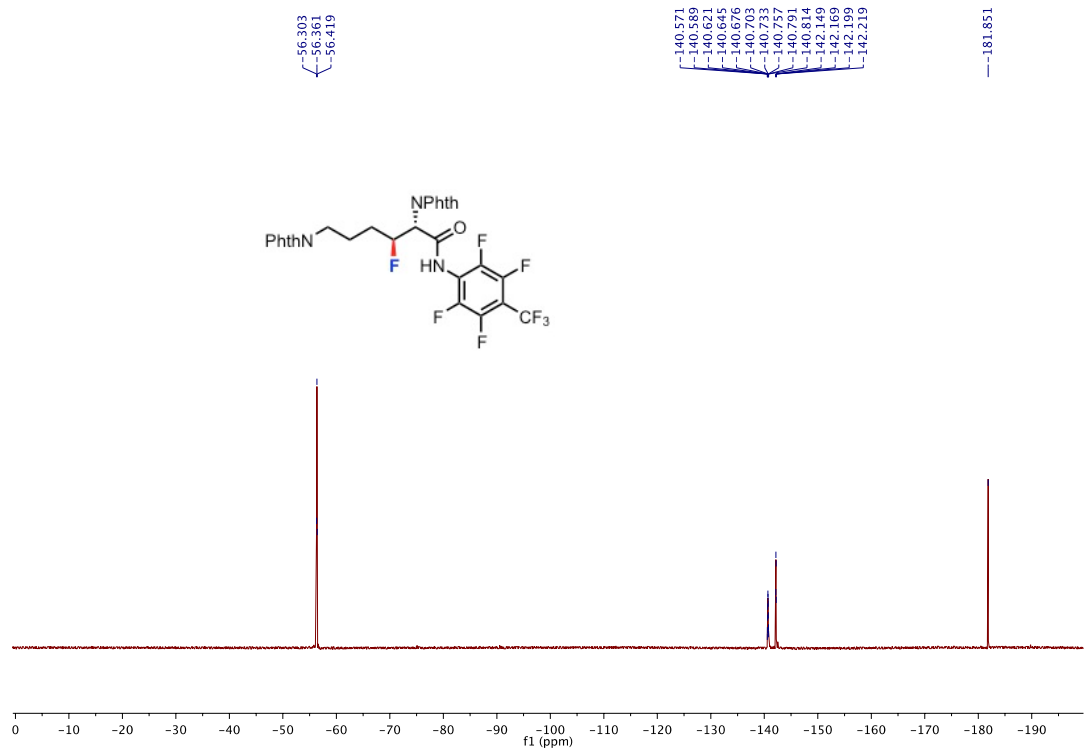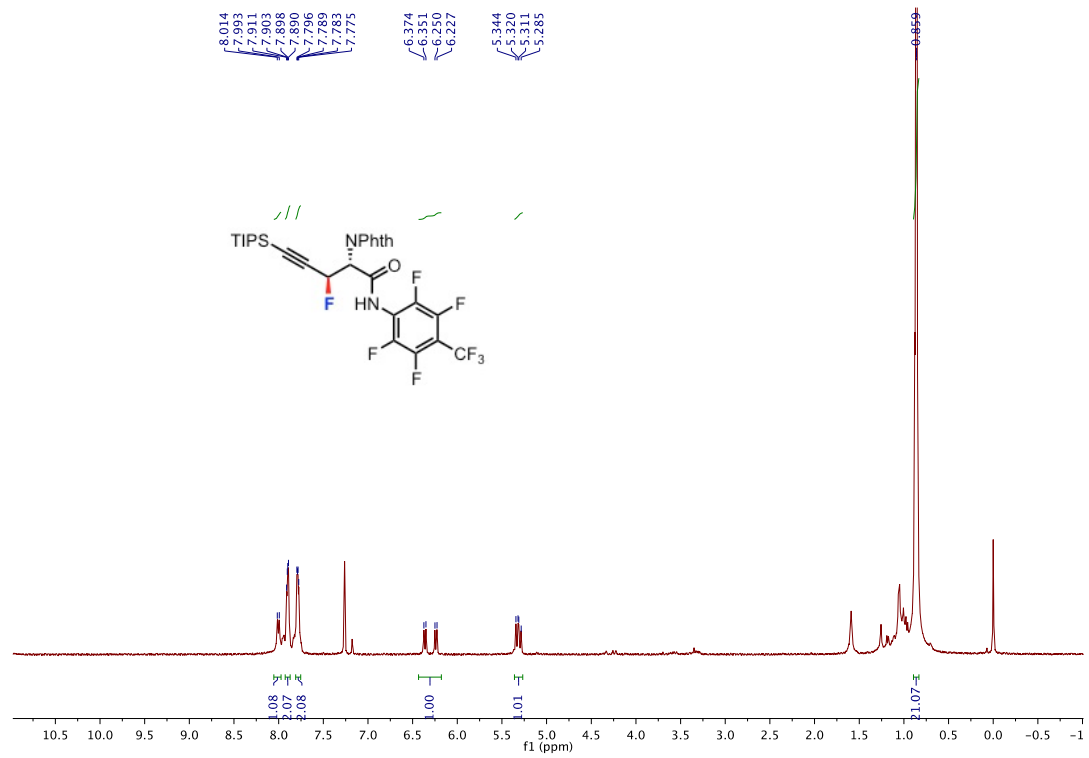

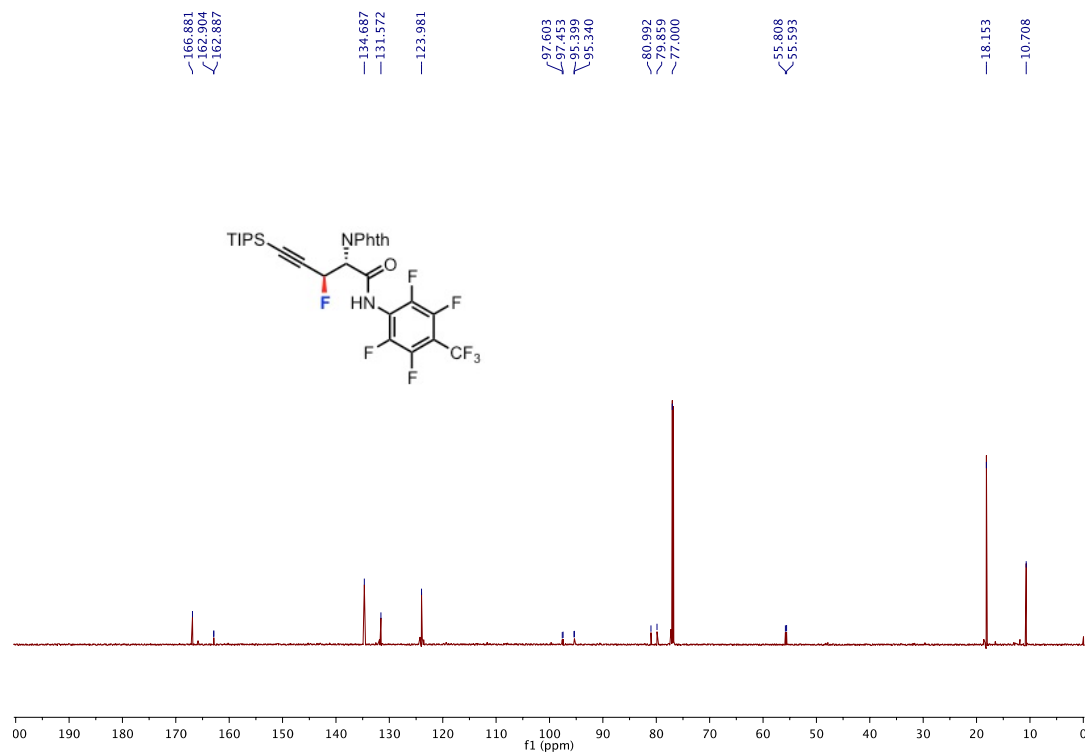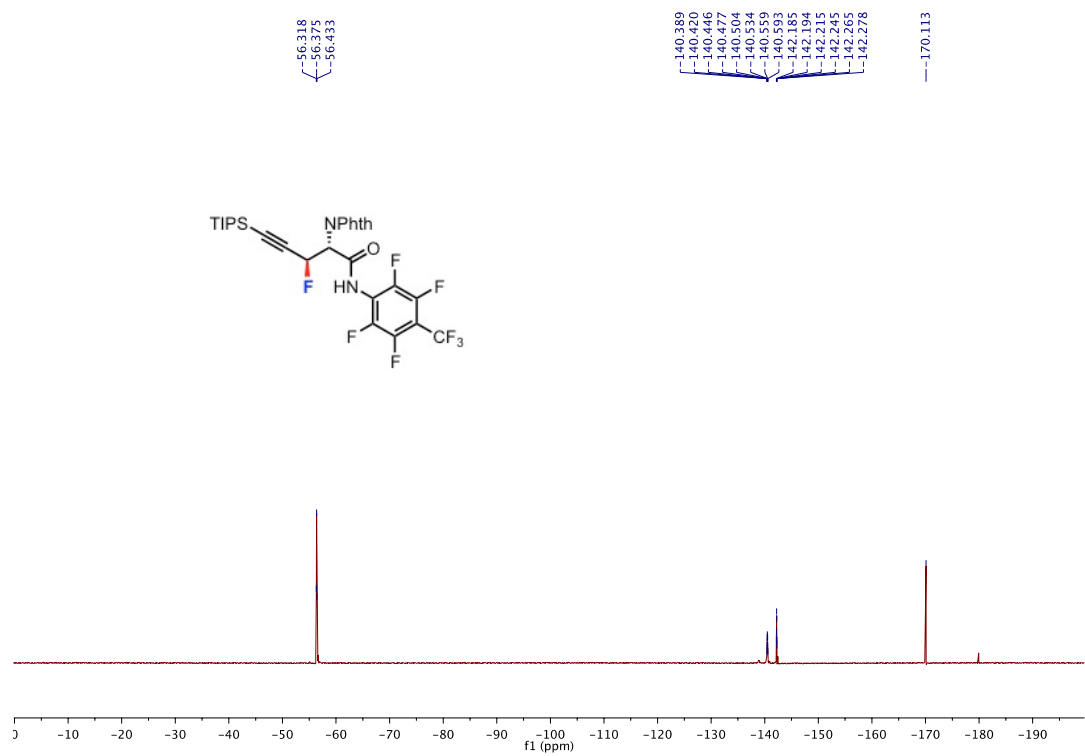

## X-ray Crystallographic Data of 2c

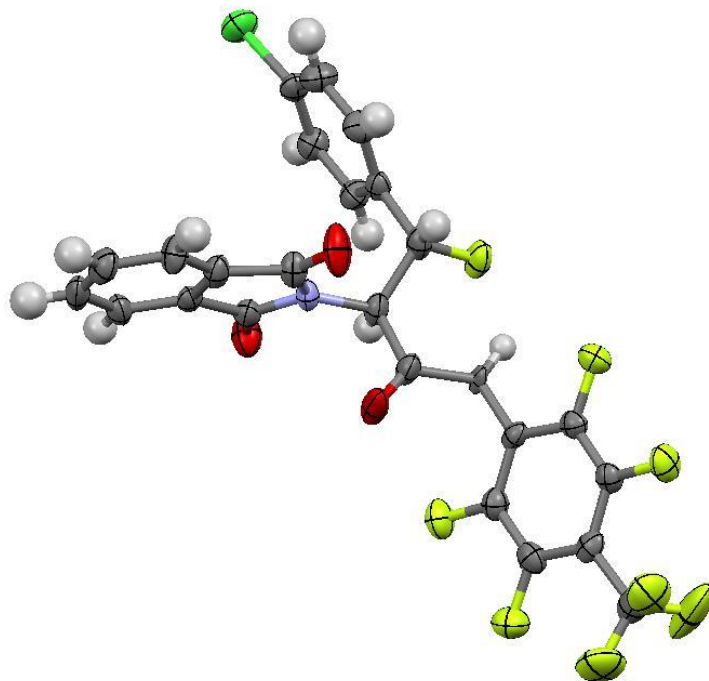

Table 1. Crystal data and structure refinement for 2c.

|                                 |                                                                   |                               |
|---------------------------------|-------------------------------------------------------------------|-------------------------------|
| Identification code             | 2c                                                                |                               |
| Empirical formula               | $C_{24}H_{11}ClF_8N_2O_3$                                         |                               |
| Formula weight                  | 562.80                                                            |                               |
| Temperature                     | 100.0 K                                                           |                               |
| Wavelength                      | 0.71073 Å                                                         |                               |
| Crystal system                  | Triclinic                                                         |                               |
| Space group                     | P1                                                                |                               |
| Unit cell dimensions            | $a = 8.4169(5)$ Å                                                 | $\alpha = 100.935(2)^\circ$ . |
|                                 | $b = 9.1537(5)$ Å                                                 | $\beta = 101.544(2)^\circ$ .  |
|                                 | $c = 15.6960(8)$ Å                                                | $\gamma = 104.301(2)^\circ$ . |
| Volume                          | $1111.12(11)$ Å <sup>3</sup>                                      |                               |
| Z                               | 2                                                                 |                               |
| Density (calculated)            | 1.682 Mg/m <sup>3</sup>                                           |                               |
| Absorption coefficient          | 0.272 mm <sup>-1</sup>                                            |                               |
| F(000)                          | 564                                                               |                               |
| Crystal size                    | 0.3 x 0.25 x 0.2 mm <sup>3</sup>                                  |                               |
| Theta range for data collection | 1.368 to 26.373°.                                                 |                               |
| Index ranges                    | $-6 \leq h \leq 10$ , $-11 \leq k \leq 11$ , $-19 \leq l \leq 19$ |                               |
| Reflections collected           | 11968                                                             |                               |

|                                   |                                             |
|-----------------------------------|---------------------------------------------|
| Independent reflections           | 6275 [R(int) = 0.0352]                      |
| Completeness to theta = 26.000°   | 99.6 %                                      |
| Absorption correction             | Semi-empirical from equivalents             |
| Max. and min. transmission        | 0.0932 and 0.0596                           |
| Refinement method                 | Full-matrix least-squares on F <sup>2</sup> |
| Data / restraints / parameters    | 6275 / 3 / 685                              |
| Goodness-of-fit on F <sup>2</sup> | 1.040                                       |
| Final R indices [I>2sigma(I)]     | R1 = 0.0419, wR2 = 0.1199                   |
| R indices (all data)              | R1 = 0.0526, wR2 = 0.1347                   |
| Absolute structure parameter      | 0.15(5)                                     |
| Extinction coefficient            | n/a                                         |
| Largest diff. peak and hole       | 0.390 and -0.379 e.Å <sup>-3</sup>          |



Table 2. Atomic coordinates ( $\times 10^4$ ) and equivalent isotropic displacement parameters ( $\text{\AA}^2 \times 10^3$ ) for **2c**.  
 $U(\text{eq})$  is defined as one third of the trace of the orthogonalized  $U^{ij}$  tensor.

|       | x        | y        | z       | U(eq)  |
|-------|----------|----------|---------|--------|
| Cl(2) | 11029(2) | -1359(2) | 9375(1) | 50(1)  |
| Cl(1) | -751(2)  | 11527(2) | 636(1)  | 55(1)  |
| F(9)  | 6400(4)  | 378(3)   | 5951(2) | 40(1)  |
| F(12) | 2588(4)  | 4621(4)  | 3527(2) | 47(1)  |
| F(10) | 616(5)   | 1261(4)  | 5824(2) | 51(1)  |
| F(13) | 4836(4)  | 3678(4)  | 4559(2) | 42(1)  |
| F(5)  | 5349(4)  | 6778(3)  | 5493(2) | 43(1)  |
| F(4)  | 7391(4)  | 5658(3)  | 6548(2) | 47(1)  |
| F(11) | -1676(4) | 2092(4)  | 4758(3) | 60(1)  |
| F(1)  | 4103(4)  | 10014(4) | 4079(2) | 49(1)  |
| F(3)  | 11842(4) | 7694(4)  | 5272(2) | 58(1)  |
| F(2)  | 9777(5)  | 8708(4)  | 4211(2) | 51(1)  |
| O(6)  | 4056(5)  | 500(4)   | 8204(2) | 43(1)  |
| O(5)  | 8432(6)  | 4764(4)  | 8442(3) | 53(1)  |
| N(3)  | 6248(5)  | 2497(4)  | 8113(2) | 29(1)  |
| O(1)  | 5977(6)  | 9957(4)  | 1445(3) | 53(1)  |
| O(4)  | 3720(6)  | 3226(5)  | 7110(2) | 53(1)  |
| F(6)  | 10115(6) | 4597(5)  | 6605(3) | 75(1)  |
| O(3)  | 6624(6)  | 6981(5)  | 2942(2) | 54(1)  |
| N(1)  | 4376(5)  | 7972(4)  | 1900(3) | 30(1)  |
| N(4)  | 4048(6)  | 2050(5)  | 5778(3) | 38(1)  |
| O(2)  | 2580(7)  | 5648(4)  | 1931(3) | 60(1)  |
| F(15) | -2219(6) | 3980(7)  | 3786(4) | 101(2) |
| F(14) | -322(6)  | 5223(6)  | 3343(3) | 89(2)  |
| F(8)  | 12237(6) | 5970(6)  | 6345(3) | 80(1)  |
| C(2)  | 4360(6)  | 7444(5)  | 413(3)  | 31(1)  |
| N(2)  | 6365(6)  | 8293(5)  | 4255(3) | 36(1)  |
| C(32) | 7415(7)  | 3874(5)  | 8680(3) | 35(1)  |
| F(7)  | 11249(8) | 6913(6)  | 7402(3) | 116(2) |
| C(15) | 678(7)   | 8811(6)  | 2154(4) | 40(1)  |
| C(10) | 2337(7)  | 9677(5)  | 2620(3) | 33(1)  |
| C(31) | 7067(7)  | 3933(6)  | 9573(3) | 33(1)  |
| C(25) | 5173(7)  | 1695(6)  | 8556(3) | 32(1)  |

|        |          |          |          |        |
|--------|----------|----------|----------|--------|
| C(22)  | 8020(7)  | 6424(5)  | 5977(3)  | 34(1)  |
| C(6)   | 2484(8)  | 4810(6)  | -132(3)  | 46(1)  |
| C(3)   | 4648(7)  | 7453(7)  | -421(4)  | 40(1)  |
| C(23)  | 6952(6)  | 6981(5)  | 5431(3)  | 32(1)  |
| C(1)   | 5044(7)  | 8643(6)  | 1270(3)  | 34(1)  |
| C(35)  | 7281(6)  | -90(5)   | 7393(3)  | 31(1)  |
| C(45)  | 367(7)   | 3405(6)  | 4104(3)  | 34(1)  |
| C(44)  | -61(7)   | 2548(6)  | 4707(4)  | 38(1)  |
| C(33)  | 6029(7)  | 2100(5)  | 7155(3)  | 32(1)  |
| C(13)  | 420(7)   | 10824(6) | 1422(3)  | 38(1)  |
| C(46)  | 2051(7)  | 3785(5)  | 4080(3)  | 33(1)  |
| C(43)  | 1124(7)  | 2119(5)  | 5267(3)  | 35(1)  |
| C(7)   | 3302(7)  | 6132(6)  | 553(3)   | 37(1)  |
| C(26)  | 5744(6)  | 2636(6)  | 9511(3)  | 32(1)  |
| C(18)  | 7476(7)  | 7726(5)  | 4810(3)  | 31(1)  |
| C(39)  | 7891(7)  | -1722(6) | 8367(4)  | 39(1)  |
| F(16)  | -1473(9) | 2852(7)  | 2709(4)  | 161(4) |
| C(48)  | -935(8)  | 3849(7)  | 3471(4)  | 50(2)  |
| C(40)  | 6747(6)  | -1316(6) | 7766(4)  | 37(1)  |
| C(38)  | 9589(7)  | -897(6)  | 8592(3)  | 38(1)  |
| C(19)  | 9145(7)  | 7937(6)  | 4772(3)  | 36(1)  |
| C(42)  | 2799(7)  | 2489(5)  | 5234(3)  | 32(1)  |
| C(21)  | 9688(7)  | 6611(6)  | 5942(3)  | 34(1)  |
| C(16)  | 6030(7)  | 7878(6)  | 3333(3)  | 37(1)  |
| C(29)  | 7213(9)  | 4829(7)  | 11113(4) | 50(2)  |
| C(47)  | 3228(6)  | 3306(6)  | 4619(3)  | 31(1)  |
| C(11)  | 2994(7)  | 11134(6) | 2483(3)  | 38(1)  |
| C(41)  | 4470(7)  | 2519(6)  | 6696(3)  | 38(1)  |
| C(28)  | 5915(8)  | 3523(7)  | 11050(3) | 48(1)  |
| C(34)  | 6007(6)  | 401(5)   | 6792(3)  | 31(1)  |
| C(12)  | 2038(7)  | 11727(5) | 1895(3)  | 36(1)  |
| C(8)   | 4906(7)  | 8743(6)  | 2859(3)  | 34(1)  |
| C(9)   | 3408(7)  | 8980(6)  | 3209(3)  | 38(1)  |
| C(14)  | -272(7)  | 9392(6)  | 1558(4)  | 47(1)  |
| C(01W) | 3308(8)  | 6467(5)  | 1522(3)  | 36(1)  |
| C(37)  | 10162(7) | 300(6)   | 8207(4)  | 44(1)  |
| C(20)  | 10236(7) | 7410(6)  | 5335(3)  | 38(1)  |
| C(4)   | 3846(8)  | 6111(7)  | -1102(4) | 47(1)  |

|       |          |         |          |       |
|-------|----------|---------|----------|-------|
| C(27) | 5141(7)  | 2386(7) | 10239(4) | 43(1) |
| C(5)  | 2788(8)  | 4833(7) | -973(4)  | 46(1) |
| C(36) | 9004(7)  | 704(6)  | 7608(4)  | 40(1) |
| C(24) | 10847(9) | 6072(8) | 6589(4)  | 54(2) |
| C(30) | 7828(8)  | 5046(6) | 10380(3) | 43(1) |

---

Table 3. Bond lengths [ $\text{\AA}$ ] and angles [ $^\circ$ ] for **2c**.

---

|             |          |
|-------------|----------|
| Cl(2)-C(38) | 1.736(5) |
| Cl(1)-C(13) | 1.742(5) |
| F(9)-C(34)  | 1.422(5) |
| F(12)-C(46) | 1.335(6) |
| F(10)-C(43) | 1.345(6) |
| F(13)-C(47) | 1.339(6) |
| F(5)-C(23)  | 1.342(6) |
| F(4)-C(22)  | 1.348(6) |
| F(11)-C(44) | 1.343(6) |
| F(1)-C(9)   | 1.421(5) |
| F(3)-C(20)  | 1.339(7) |
| F(2)-C(19)  | 1.340(6) |
| O(6)-C(25)  | 1.200(6) |
| O(5)-C(32)  | 1.198(7) |
| N(3)-C(32)  | 1.400(6) |
| N(3)-C(25)  | 1.399(7) |
| N(3)-C(33)  | 1.440(6) |
| O(1)-C(1)   | 1.209(6) |
| O(4)-C(41)  | 1.203(7) |
| F(6)-C(24)  | 1.345(8) |
| O(3)-C(16)  | 1.198(7) |
| N(1)-C(1)   | 1.397(6) |
| N(1)-C(8)   | 1.462(6) |
| N(1)-C(01W) | 1.387(6) |
| N(4)-H(4)   | 0.8800   |
| N(4)-C(42)  | 1.405(6) |
| N(4)-C(41)  | 1.368(6) |
| O(2)-C(01W) | 1.210(6) |
| F(15)-C(48) | 1.297(8) |
| F(14)-C(48) | 1.306(8) |
| F(8)-C(24)  | 1.320(8) |
| C(2)-C(3)   | 1.379(7) |
| C(2)-C(1)   | 1.471(7) |
| C(2)-C(7)   | 1.391(7) |
| N(2)-H(2)   | 0.8800   |
| N(2)-C(18)  | 1.411(6) |

|             |          |
|-------------|----------|
| N(2)-C(16)  | 1.376(6) |
| C(32)-C(31) | 1.482(7) |
| F(7)-C(24)  | 1.289(7) |
| C(15)-H(15) | 0.9500   |
| C(15)-C(10) | 1.392(7) |
| C(15)-C(14) | 1.377(8) |
| C(10)-C(11) | 1.387(7) |
| C(10)-C(9)  | 1.499(7) |
| C(31)-C(26) | 1.385(7) |
| C(31)-C(30) | 1.384(7) |
| C(25)-C(26) | 1.496(7) |
| C(22)-C(23) | 1.374(7) |
| C(22)-C(21) | 1.386(8) |
| C(6)-H(6)   | 0.9500   |
| C(6)-C(7)   | 1.375(7) |
| C(6)-C(5)   | 1.398(8) |
| C(3)-H(3)   | 0.9500   |
| C(3)-C(4)   | 1.383(8) |
| C(23)-C(18) | 1.372(7) |
| C(35)-C(40) | 1.381(7) |
| C(35)-C(34) | 1.495(7) |
| C(35)-C(36) | 1.391(7) |
| C(45)-C(44) | 1.387(8) |
| C(45)-C(46) | 1.383(8) |
| C(45)-C(48) | 1.514(8) |
| C(44)-C(43) | 1.377(8) |
| C(33)-H(33) | 1.0000   |
| C(33)-C(41) | 1.537(7) |
| C(33)-C(34) | 1.545(6) |
| C(13)-C(12) | 1.377(7) |
| C(13)-C(14) | 1.372(8) |
| C(46)-C(47) | 1.381(7) |
| C(43)-C(42) | 1.380(8) |
| C(7)-C(01W) | 1.492(7) |
| C(26)-C(27) | 1.375(8) |
| C(18)-C(19) | 1.385(8) |
| C(39)-H(39) | 0.9500   |
| C(39)-C(40) | 1.380(7) |

|                  |          |
|------------------|----------|
| C(39)-C(38)      | 1.378(7) |
| F(16)-C(48)      | 1.277(7) |
| C(40)-H(40)      | 0.9500   |
| C(38)-C(37)      | 1.380(8) |
| C(19)-C(20)      | 1.383(8) |
| C(42)-C(47)      | 1.380(7) |
| C(21)-C(20)      | 1.389(7) |
| C(21)-C(24)      | 1.503(8) |
| C(16)-C(8)       | 1.545(7) |
| C(29)-H(29)      | 0.9500   |
| C(29)-C(28)      | 1.378(9) |
| C(29)-C(30)      | 1.379(8) |
| C(11)-H(11)      | 0.9500   |
| C(11)-C(12)      | 1.380(7) |
| C(28)-H(28)      | 0.9500   |
| C(28)-C(27)      | 1.400(8) |
| C(34)-H(34)      | 1.0000   |
| C(12)-H(12)      | 0.9500   |
| C(8)-H(8)        | 1.0000   |
| C(8)-C(9)        | 1.518(8) |
| C(9)-H(9)        | 1.0000   |
| C(14)-H(14)      | 0.9500   |
| C(37)-H(37)      | 0.9500   |
| C(37)-C(36)      | 1.384(8) |
| C(4)-H(4A)       | 0.9500   |
| C(4)-C(5)        | 1.360(9) |
| C(27)-H(27)      | 0.9500   |
| C(5)-H(5)        | 0.9500   |
| C(36)-H(36)      | 0.9500   |
| C(30)-H(30)      | 0.9500   |
|                  |          |
| C(32)-N(3)-C(33) | 122.5(4) |
| C(25)-N(3)-C(32) | 112.6(4) |
| C(25)-N(3)-C(33) | 124.3(4) |
| C(1)-N(1)-C(8)   | 122.4(4) |
| C(01W)-N(1)-C(1) | 112.4(4) |
| C(01W)-N(1)-C(8) | 124.9(4) |
| C(42)-N(4)-H(4)  | 118.8    |

|                   |          |
|-------------------|----------|
| C(41)-N(4)-H(4)   | 118.8    |
| C(41)-N(4)-C(42)  | 122.4(4) |
| C(3)-C(2)-C(1)    | 130.7(5) |
| C(3)-C(2)-C(7)    | 120.8(5) |
| C(7)-C(2)-C(1)    | 108.4(4) |
| C(18)-N(2)-H(2)   | 118.9    |
| C(16)-N(2)-H(2)   | 118.9    |
| C(16)-N(2)-C(18)  | 122.2(4) |
| O(5)-C(32)-N(3)   | 124.2(5) |
| O(5)-C(32)-C(31)  | 130.7(5) |
| N(3)-C(32)-C(31)  | 105.1(4) |
| C(10)-C(15)-H(15) | 120.0    |
| C(14)-C(15)-H(15) | 120.0    |
| C(14)-C(15)-C(10) | 120.1(5) |
| C(15)-C(10)-C(9)  | 119.7(4) |
| C(11)-C(10)-C(15) | 118.8(5) |
| C(11)-C(10)-C(9)  | 121.4(5) |
| C(26)-C(31)-C(32) | 109.2(4) |
| C(30)-C(31)-C(32) | 130.0(5) |
| C(30)-C(31)-C(26) | 120.7(5) |
| O(6)-C(25)-N(3)   | 124.6(4) |
| O(6)-C(25)-C(26)  | 130.0(5) |
| N(3)-C(25)-C(26)  | 105.4(4) |
| F(4)-C(22)-C(23)  | 118.0(5) |
| F(4)-C(22)-C(21)  | 120.3(5) |
| C(23)-C(22)-C(21) | 121.7(5) |
| C(7)-C(6)-H(6)    | 121.5    |
| C(7)-C(6)-C(5)    | 117.0(5) |
| C(5)-C(6)-H(6)    | 121.5    |
| C(2)-C(3)-H(3)    | 121.4    |
| C(2)-C(3)-C(4)    | 117.2(5) |
| C(4)-C(3)-H(3)    | 121.4    |
| F(5)-C(23)-C(22)  | 119.5(5) |
| F(5)-C(23)-C(18)  | 118.8(5) |
| C(18)-C(23)-C(22) | 121.6(5) |
| O(1)-C(1)-N(1)    | 123.8(5) |
| O(1)-C(1)-C(2)    | 130.3(5) |
| N(1)-C(1)-C(2)    | 105.8(4) |

|                   |          |
|-------------------|----------|
| C(40)-C(35)-C(34) | 119.9(4) |
| C(40)-C(35)-C(36) | 119.2(5) |
| C(36)-C(35)-C(34) | 120.8(4) |
| C(44)-C(45)-C(48) | 122.4(5) |
| C(46)-C(45)-C(44) | 116.4(5) |
| C(46)-C(45)-C(48) | 121.1(5) |
| F(11)-C(44)-C(45) | 120.4(5) |
| F(11)-C(44)-C(43) | 117.5(5) |
| C(43)-C(44)-C(45) | 122.1(5) |
| N(3)-C(33)-H(33)  | 106.8    |
| N(3)-C(33)-C(41)  | 109.1(4) |
| N(3)-C(33)-C(34)  | 112.2(4) |
| C(41)-C(33)-H(33) | 106.8    |
| C(41)-C(33)-C(34) | 114.6(4) |
| C(34)-C(33)-H(33) | 106.8    |
| C(12)-C(13)-Cl(1) | 118.8(4) |
| C(14)-C(13)-Cl(1) | 120.0(4) |
| C(14)-C(13)-C(12) | 121.2(5) |
| F(12)-C(46)-C(45) | 120.8(5) |
| F(12)-C(46)-C(47) | 117.8(5) |
| C(47)-C(46)-C(45) | 121.5(5) |
| F(10)-C(43)-C(44) | 119.0(5) |
| F(10)-C(43)-C(42) | 119.7(5) |
| C(44)-C(43)-C(42) | 121.2(5) |
| C(2)-C(7)-C(01W)  | 107.8(4) |
| C(6)-C(7)-C(2)    | 121.6(5) |
| C(6)-C(7)-C(01W)  | 130.5(5) |
| C(31)-C(26)-C(25) | 107.7(4) |
| C(27)-C(26)-C(31) | 122.1(5) |
| C(27)-C(26)-C(25) | 130.2(5) |
| C(23)-C(18)-N(2)  | 120.9(5) |
| C(23)-C(18)-C(19) | 117.4(5) |
| C(19)-C(18)-N(2)  | 121.6(5) |
| C(40)-C(39)-H(39) | 120.3    |
| C(38)-C(39)-H(39) | 120.3    |
| C(38)-C(39)-C(40) | 119.3(5) |
| F(15)-C(48)-F(14) | 103.4(6) |
| F(15)-C(48)-C(45) | 112.8(5) |



|                   |          |
|-------------------|----------|
| F(14)-C(48)-C(45) | 112.1(5) |
| F(16)-C(48)-F(15) | 109.1(7) |
| F(16)-C(48)-F(14) | 108.5(6) |
| F(16)-C(48)-C(45) | 110.6(5) |
| C(35)-C(40)-H(40) | 119.6    |
| C(39)-C(40)-C(35) | 120.8(5) |
| C(39)-C(40)-H(40) | 119.6    |
| C(39)-C(38)-Cl(2) | 119.7(4) |
| C(39)-C(38)-C(37) | 121.0(5) |
| C(37)-C(38)-Cl(2) | 119.3(4) |
| F(2)-C(19)-C(18)  | 121.2(5) |
| F(2)-C(19)-C(20)  | 117.6(5) |
| C(20)-C(19)-C(18) | 121.1(5) |
| C(43)-C(42)-N(4)  | 123.3(5) |
| C(43)-C(42)-C(47) | 117.1(5) |
| C(47)-C(42)-N(4)  | 119.6(5) |
| C(22)-C(21)-C(20) | 116.7(5) |
| C(22)-C(21)-C(24) | 120.1(5) |
| C(20)-C(21)-C(24) | 123.0(6) |
| O(3)-C(16)-N(2)   | 122.7(5) |
| O(3)-C(16)-C(8)   | 123.5(5) |
| N(2)-C(16)-C(8)   | 113.7(4) |
| C(28)-C(29)-H(29) | 119.4    |
| C(28)-C(29)-C(30) | 121.1(5) |
| C(30)-C(29)-H(29) | 119.4    |
| F(13)-C(47)-C(46) | 119.2(4) |
| F(13)-C(47)-C(42) | 119.0(5) |
| C(42)-C(47)-C(46) | 121.7(5) |
| C(10)-C(11)-H(11) | 119.4    |
| C(12)-C(11)-C(10) | 121.2(5) |
| C(12)-C(11)-H(11) | 119.4    |
| O(4)-C(41)-N(4)   | 123.4(5) |
| O(4)-C(41)-C(33)  | 122.7(4) |
| N(4)-C(41)-C(33)  | 113.9(4) |
| C(29)-C(28)-H(28) | 119.2    |
| C(29)-C(28)-C(27) | 121.5(5) |
| C(27)-C(28)-H(28) | 119.2    |
| F(9)-C(34)-C(35)  | 110.0(4) |

|                   |          |
|-------------------|----------|
| F(9)-C(34)-C(33)  | 104.4(3) |
| F(9)-C(34)-H(34)  | 109.7    |
| C(35)-C(34)-C(33) | 113.1(4) |
| C(35)-C(34)-H(34) | 109.7    |
| C(33)-C(34)-H(34) | 109.7    |
| C(13)-C(12)-C(11) | 118.7(5) |
| C(13)-C(12)-H(12) | 120.7    |
| C(11)-C(12)-H(12) | 120.7    |
| N(1)-C(8)-C(16)   | 107.6(4) |
| N(1)-C(8)-H(8)    | 106.2    |
| N(1)-C(8)-C(9)    | 111.3(4) |
| C(16)-C(8)-H(8)   | 106.2    |
| C(9)-C(8)-C(16)   | 118.5(4) |
| C(9)-C(8)-H(8)    | 106.2    |
| F(1)-C(9)-C(10)   | 109.6(4) |
| F(1)-C(9)-C(8)    | 106.3(4) |
| F(1)-C(9)-H(9)    | 109.6    |
| C(10)-C(9)-C(8)   | 112.0(4) |
| C(10)-C(9)-H(9)   | 109.6    |
| C(8)-C(9)-H(9)    | 109.6    |
| C(15)-C(14)-H(14) | 120.0    |
| C(13)-C(14)-C(15) | 119.9(5) |
| C(13)-C(14)-H(14) | 120.0    |
| N(1)-C(01W)-C(7)  | 105.5(4) |
| O(2)-C(01W)-N(1)  | 124.7(5) |
| O(2)-C(01W)-C(7)  | 129.8(5) |
| C(38)-C(37)-H(37) | 120.4    |
| C(38)-C(37)-C(36) | 119.2(5) |
| C(36)-C(37)-H(37) | 120.4    |
| F(3)-C(20)-C(19)  | 117.5(5) |
| F(3)-C(20)-C(21)  | 121.1(5) |
| C(19)-C(20)-C(21) | 121.4(5) |
| C(3)-C(4)-H(4A)   | 118.9    |
| C(5)-C(4)-C(3)    | 122.2(5) |
| C(5)-C(4)-H(4A)   | 118.9    |
| C(26)-C(27)-C(28) | 116.7(5) |
| C(26)-C(27)-H(27) | 121.7    |
| C(28)-C(27)-H(27) | 121.7    |

|                   |          |
|-------------------|----------|
| C(6)-C(5)-H(5)    | 119.5    |
| C(4)-C(5)-C(6)    | 121.1(5) |
| C(4)-C(5)-H(5)    | 119.5    |
| C(35)-C(36)-H(36) | 119.8    |
| C(37)-C(36)-C(35) | 120.4(5) |
| C(37)-C(36)-H(36) | 119.8    |
| F(6)-C(24)-C(21)  | 111.0(5) |
| F(8)-C(24)-F(6)   | 102.4(5) |
| F(8)-C(24)-C(21)  | 113.2(6) |
| F(7)-C(24)-F(6)   | 107.0(6) |
| F(7)-C(24)-F(8)   | 109.7(6) |
| F(7)-C(24)-C(21)  | 112.9(5) |
| C(31)-C(30)-H(30) | 121.0    |
| C(29)-C(30)-C(31) | 117.9(6) |
| C(29)-C(30)-H(30) | 121.0    |

---

Symmetry transformations used to generate equivalent atoms:

Table 4. Anisotropic displacement parameters ( $\text{\AA}^2 \times 10^3$ ) for **2c**. The anisotropic displacement factor exponent takes the form:  $-2\pi^2 [ h^2 a^{*2} U^{11} + \dots + 2 h k a^* b^* U^{12} ]$

|       | U <sup>11</sup> | U <sup>22</sup> | U <sup>33</sup> | U <sup>23</sup> | U <sup>13</sup> | U <sup>12</sup> |
|-------|-----------------|-----------------|-----------------|-----------------|-----------------|-----------------|
| Cl(2) | 43(1)           | 58(1)           | 50(1)           | 14(1)           | -1(1)           | 25(1)           |
| Cl(1) | 52(1)           | 69(1)           | 56(1)           | 30(1)           | 9(1)            | 32(1)           |
| F(9)  | 57(2)           | 49(2)           | 23(1)           | 5(1)            | 12(1)           | 31(2)           |
| F(12) | 56(2)           | 52(2)           | 41(2)           | 26(1)           | 15(2)           | 15(2)           |
| F(10) | 65(2)           | 50(2)           | 43(2)           | 22(1)           | 21(2)           | 11(2)           |
| F(13) | 33(2)           | 51(2)           | 44(2)           | 12(1)           | 13(1)           | 14(1)           |
| F(5)  | 36(2)           | 52(2)           | 44(2)           | 12(1)           | 14(1)           | 18(1)           |
| F(4)  | 59(2)           | 50(2)           | 46(2)           | 27(2)           | 21(2)           | 25(2)           |
| F(11) | 34(2)           | 75(2)           | 67(2)           | 18(2)           | 17(2)           | 5(2)            |
| F(1)  | 64(2)           | 55(2)           | 28(2)           | 1(1)            | 6(2)            | 33(2)           |
| F(3)  | 36(2)           | 80(2)           | 60(2)           | 20(2)           | 13(2)           | 15(2)           |
| F(2)  | 62(2)           | 55(2)           | 42(2)           | 21(2)           | 23(2)           | 15(2)           |
| O(6)  | 33(2)           | 50(2)           | 37(2)           | 2(2)            | 9(2)            | 1(2)            |
| O(5)  | 71(3)           | 37(2)           | 37(2)           | 5(2)            | 14(2)           | -6(2)           |
| N(3)  | 31(2)           | 31(2)           | 23(2)           | 3(2)            | 7(2)            | 9(2)            |
| O(1)  | 61(3)           | 42(2)           | 44(2)           | 6(2)            | 18(2)           | -2(2)           |
| O(4)  | 70(3)           | 69(3)           | 28(2)           | 0(2)            | 8(2)            | 51(2)           |
| F(6)  | 91(3)           | 80(3)           | 82(3)           | 48(2)           | 28(2)           | 50(2)           |
| O(3)  | 76(3)           | 69(3)           | 28(2)           | 3(2)            | 7(2)            | 50(2)           |
| N(1)  | 39(2)           | 31(2)           | 21(2)           | 7(2)            | 7(2)            | 12(2)           |
| N(4)  | 53(3)           | 43(2)           | 24(2)           | 7(2)            | 8(2)            | 30(2)           |
| O(2)  | 99(4)           | 40(2)           | 39(2)           | 15(2)           | 28(2)           | 5(2)            |
| F(15) | 60(3)           | 145(4)          | 137(4)          | 79(4)           | 33(3)           | 62(3)           |
| F(14) | 81(3)           | 100(3)          | 107(4)          | 68(3)           | 11(3)           | 42(3)           |
| F(8)  | 61(3)           | 105(3)          | 99(3)           | 47(3)           | 18(2)           | 53(3)           |
| C(2)  | 31(2)           | 36(2)           | 32(2)           | 12(2)           | 7(2)            | 20(2)           |
| N(2)  | 51(3)           | 39(2)           | 24(2)           | 2(2)            | 5(2)            | 29(2)           |
| C(32) | 45(3)           | 30(2)           | 30(2)           | 9(2)            | 8(2)            | 13(2)           |
| F(7)  | 165(5)          | 134(4)          | 42(2)           | -22(2)          | -37(3)          | 115(4)          |
| C(15) | 37(3)           | 36(2)           | 49(3)           | 16(2)           | 10(2)           | 9(2)            |
| C(10) | 42(3)           | 36(2)           | 29(2)           | 6(2)            | 12(2)           | 22(2)           |
| C(31) | 39(3)           | 38(2)           | 23(2)           | 4(2)            | 2(2)            | 19(2)           |
| C(25) | 33(3)           | 40(3)           | 25(2)           | 6(2)            | 6(2)            | 15(2)           |

|        |        |        |       |        |        |        |
|--------|--------|--------|-------|--------|--------|--------|
| C(22)  | 42(3)  | 30(2)  | 28(2) | 7(2)   | 8(2)   | 11(2)  |
| C(6)   | 58(4)  | 40(3)  | 35(3) | 3(2)   | 8(3)   | 11(3)  |
| C(3)   | 43(3)  | 51(3)  | 36(3) | 15(2)  | 15(2)  | 21(3)  |
| C(23)  | 29(2)  | 34(2)  | 32(2) | 0(2)   | 9(2)   | 13(2)  |
| C(1)   | 35(3)  | 42(3)  | 32(2) | 14(2)  | 9(2)   | 20(2)  |
| C(35)  | 31(2)  | 32(2)  | 28(2) | 4(2)   | 7(2)   | 11(2)  |
| C(45)  | 33(3)  | 39(3)  | 23(2) | 1(2)   | 1(2)   | 9(2)   |
| C(44)  | 30(3)  | 37(3)  | 39(3) | 1(2)   | 4(2)   | 10(2)  |
| C(33)  | 40(3)  | 36(2)  | 21(2) | 4(2)   | 7(2)   | 16(2)  |
| C(13)  | 40(3)  | 43(3)  | 36(3) | 13(2)  | 8(2)   | 23(2)  |
| C(46)  | 45(3)  | 32(2)  | 24(2) | 7(2)   | 9(2)   | 13(2)  |
| C(43)  | 46(3)  | 30(2)  | 30(2) | 9(2)   | 16(2)  | 6(2)   |
| C(7)   | 45(3)  | 39(3)  | 30(2) | 10(2)  | 8(2)   | 18(2)  |
| C(26)  | 32(2)  | 43(3)  | 24(2) | 9(2)   | 6(2)   | 21(2)  |
| C(18)  | 39(3)  | 31(2)  | 22(2) | 3(2)   | 2(2)   | 15(2)  |
| C(39)  | 35(3)  | 35(2)  | 45(3) | 16(2)  | 5(2)   | 9(2)   |
| F(16)  | 211(7) | 138(5) | 78(3) | -60(3) | -97(4) | 129(5) |
| C(48)  | 47(4)  | 59(4)  | 41(3) | 5(3)   | -1(3)  | 28(3)  |
| C(40)  | 27(2)  | 38(3)  | 47(3) | 11(2)  | 7(2)   | 11(2)  |
| C(38)  | 35(3)  | 42(3)  | 40(3) | 9(2)   | 8(2)   | 21(2)  |
| C(19)  | 45(3)  | 31(2)  | 31(3) | 8(2)   | 10(2)  | 7(2)   |
| C(42)  | 42(3)  | 28(2)  | 26(2) | 2(2)   | 7(2)   | 16(2)  |
| C(21)  | 38(3)  | 35(2)  | 29(2) | 3(2)   | 2(2)   | 17(2)  |
| C(16)  | 47(3)  | 44(3)  | 22(2) | 5(2)   | 6(2)   | 21(3)  |
| C(29)  | 63(4)  | 55(3)  | 28(3) | -1(2)  | 1(3)   | 25(3)  |
| C(47)  | 29(3)  | 35(2)  | 25(2) | 5(2)   | 6(2)   | 8(2)   |
| C(11)  | 41(3)  | 35(2)  | 34(2) | 7(2)   | 7(2)   | 11(2)  |
| C(41)  | 47(3)  | 37(3)  | 29(2) | 8(2)   | 3(2)   | 18(2)  |
| C(28)  | 52(3)  | 74(4)  | 26(3) | 13(3)  | 16(3)  | 29(3)  |
| C(34)  | 33(2)  | 37(2)  | 25(2) | 7(2)   | 11(2)  | 14(2)  |
| C(12)  | 39(3)  | 31(2)  | 39(3) | 10(2)  | 10(2)  | 11(2)  |
| C(8)   | 46(3)  | 34(2)  | 22(2) | 5(2)   | 8(2)   | 15(2)  |
| C(9)   | 52(3)  | 38(3)  | 25(2) | 5(2)   | 10(2)  | 20(2)  |
| C(14)  | 36(3)  | 46(3)  | 53(3) | 15(3)  | 3(3)   | 10(3)  |
| C(01W) | 52(3)  | 30(2)  | 29(2) | 8(2)   | 12(2)  | 15(2)  |
| C(37)  | 28(3)  | 47(3)  | 57(3) | 17(3)  | 9(3)   | 11(2)  |
| C(20)  | 35(3)  | 40(3)  | 37(3) | 4(2)   | 9(2)   | 14(2)  |
| C(4)   | 60(4)  | 66(4)  | 27(3) | 14(3)  | 13(3)  | 39(3)  |

|       |       |       |       |       |       |       |
|-------|-------|-------|-------|-------|-------|-------|
| C(27) | 35(3) | 57(3) | 38(3) | 12(2) | 6(2)  | 16(3) |
| C(5)  | 52(3) | 47(3) | 32(3) | -2(2) | -1(3) | 19(3) |
| C(36) | 34(3) | 44(3) | 52(3) | 22(2) | 16(2) | 15(2) |
| C(24) | 59(4) | 57(4) | 40(3) | 2(3)  | -4(3) | 30(3) |
| C(30) | 52(3) | 42(3) | 31(3) | 1(2)  | 5(2)  | 16(3) |

---

Table 5. Hydrogen coordinates ( $\times 10^4$ ) and isotropic displacement parameters ( $\text{\AA}^2 \times 10^{-3}$ ) for **2c**.

|       | x     | y     | z     | U(eq) |
|-------|-------|-------|-------|-------|
| H(4)  | 4578  | 1450  | 5518  | 45    |
| H(2)  | 5869  | 8935  | 4507  | 44    |
| H(15) | 201   | 7817  | 2247  | 48    |
| H(6)  | 1745  | 3922  | -37   | 55    |
| H(3)  | 5367  | 8345  | -522  | 49    |
| H(33) | 7042  | 2787  | 7036  | 38    |
| H(39) | 7514  | -2563 | 8623  | 47    |
| H(40) | 5577  | -1885 | 7606  | 45    |
| H(29) | 7694  | 5591  | 11670 | 60    |
| H(11) | 4124  | 11735 | 2800  | 45    |
| H(28) | 5536  | 3393  | 11570 | 57    |
| H(34) | 4845  | -319  | 6698  | 37    |
| H(12) | 2486  | 12739 | 1818  | 43    |
| H(8)  | 5668  | 9807  | 2922  | 40    |
| H(9)  | 2697  | 7961  | 3254  | 45    |
| H(14) | -1406 | 8802  | 1242  | 56    |
| H(37) | 11339 | 841   | 8352  | 52    |
| H(4A) | 4041  | 6081  | -1680 | 56    |
| H(27) | 4244  | 1486  | 10194 | 52    |
| H(5)  | 2248  | 3941  | -1463 | 56    |
| H(36) | 9387  | 1528  | 7341  | 49    |
| H(30) | 8743  | 5932  | 10428 | 52    |
